# Supplementary material for: A Multilevel Analysis of Regressors of Access to Improved Drinking Water and Sanitation Facilities in Ghana
Source: J Environ Public Health. 2019 Jun 4;2019:3983869. doi: 10.1155/2019/3983869 (PMC6589203; doi:10.1155/2019/3983869)
Supplement: Supplementary Materials — “MultiLevelData.xlsx” is the minimal dataset supporting the findings of the study. [file 3983869.f1.xlsx]

## Sheet: Sheet1
ID	SexHHH	AgeHHH	EducationHHH	MaritalStatusHHH	SizeOFHousehold	Regions	PlaceOfResidence	WealthIndexHH	SourceOfDrinkingWater	TypeOfToiletFacility
1	Female	15-34 years	Middle/JSS/JHS	Never married/never lived together	15-34 years	Western	Rural	Richer	Improved source of drinking water	Unimproved
2	Female	15-34 years	Middle/JSS/JHS	Never married/never lived together	15-34 years	Western	Rural	Middle	Improved source of drinking water	Unimproved
3	Female	15-34 years	Middle/JSS/JHS	Never married/never lived together	15-34 years	Eastern	Rural	Richer	Improved source of drinking water	Unimproved
4	Female	15-34 years	Middle/JSS/JHS	Never married/never lived together	15-34 years	Eastern	Rural	Poorer	Improved source of drinking water	Unimproved
5	Female	15-34 years	Primary	Never married/never lived together	15-34 years	Eastern	Rural	Poorer	Improved source of drinking water	Unimproved
6	Female	15-34 years	Secondary/SSS/SHS	Never married/never lived together	15-34 years	Central	Rural	Middle	Improved source of drinking water	Unimproved
7	Female	15-34 years	Secondary/SSS/SHS	Never married/never lived together	15-34 years	Ashanti	Urban	Richest	Improved source of drinking water	Unimproved
8	Female	15-34 years	Secondary/SSS/SHS	Never married/never lived together	15-34 years	Ashanti	Urban	Richest	Improved source of drinking water	Unimproved
9	Female	15-34 years	Middle/JSS/JHS	Never married/never lived together	15-34 years	Ashanti	Urban	Richest	Improved source of drinking water	Unimproved
10	Female	15-34 years	Secondary/SSS/SHS	Never married/never lived together	15-34 years	Ashanti	Urban	Richest	Improved source of drinking water	Unimproved
11	Female	15-34 years	Higher	Never married/never lived together	15-34 years	Central	Urban	Richer	Improved source of drinking water	Unimproved
12	Female	15-34 years	Middle/JSS/JHS	Never married/never lived together	15-34 years	Volta	Rural	Middle	Improved source of drinking water	Unimproved
13	Female	15-34 years	Secondary/SSS/SHS	Never married/never lived together	15-34 years	Brong Ahafo	Urban	Middle	Improved source of drinking water	Unimproved
14	Female	15-34 years	Middle/JSS/JHS	Never married/never lived together	15-34 years	Brong Ahafo	Urban	Middle	Improved source of drinking water	Unimproved
15	Female	15-34 years	Secondary/SSS/SHS	Never married/never lived together	15-34 years	Northern	Urban	Middle	Improved source of drinking water	Unimproved
16	Female	15-34 years	Higher	Never married/never lived together	15-34 years	Northern	Urban	Middle	Improved source of drinking water	Unimproved
17	Female	15-34 years	Primary	Never married/never lived together	15-34 years	Northern	Urban	Middle	Improved source of drinking water	Unimproved
18	Female	15-34 years	Middle/JSS/JHS	Never married/never lived together	15-34 years	Brong Ahafo	Rural	Poorer	Improved source of drinking water	Unimproved
19	Female	15-34 years	Middle/JSS/JHS	Never married/never lived together	15-34 years	Eastern	Rural	Poorer	Unimproved source of drinking water	Unimproved
20	Female	15-34 years	Secondary/SSS/SHS	Never married/never lived together	15-34 years	Brong Ahafo	Urban	Richer	Improved source of drinking water	Unimproved
21	Female	15-34 years	Secondary/SSS/SHS	Never married/never lived together	15-34 years	Volta	Rural	Poorer	Improved source of drinking water	Unimproved
22	Female	15-34 years	Secondary/SSS/SHS	Never married/never lived together	15-34 years	Volta	Rural	Poorer	Improved source of drinking water	Unimproved
23	Female	15-34 years	Middle/JSS/JHS	Never married/never lived together	15-34 years	Volta	Rural	Middle	Improved source of drinking water	Unimproved
24	Female	15-34 years	Higher	Never married/never lived together	15-34 years	Volta	Rural	Richer	Improved source of drinking water	Unimproved
25	Female	15-34 years	Secondary/SSS/SHS	Never married/never lived together	15-34 years	Volta	Rural	Poorer	Improved source of drinking water	Unimproved
26	Female	15-34 years	Middle/JSS/JHS	Never married/never lived together	15-34 years	Volta	Rural	Middle	Improved source of drinking water	Unimproved
27	Female	15-34 years	Middle/JSS/JHS	Never married/never lived together	15-34 years	Volta	Rural	Middle	Improved source of drinking water	Unimproved
28	Female	15-34 years	Secondary/SSS/SHS	Never married/never lived together	15-34 years	Brong Ahafo	Urban	Poorer	Improved source of drinking water	Unimproved
29	Female	15-34 years	Primary	Never married/never lived together	15-34 years	Brong Ahafo	Urban	Middle	Improved source of drinking water	Unimproved
30	Female	15-34 years	Middle/JSS/JHS	Never married/never lived together	15-34 years	Brong Ahafo	Urban	Richer	Improved source of drinking water	Unimproved
31	Female	15-34 years	Secondary/SSS/SHS	Never married/never lived together	15-34 years	Greater Accra	Rural	Middle	Improved source of drinking water	Unimproved
32	Female	15-34 years	No education/preschool	Never married/never lived together	15-34 years	Ashanti	Urban	Richest	Improved source of drinking water	Unimproved
33	Female	15-34 years	Higher	Never married/never lived together	15-34 years	Brong Ahafo	Rural	Middle	Improved source of drinking water	Unimproved
34	Female	15-34 years	Secondary/SSS/SHS	Never married/never lived together	15-34 years	Greater Accra	Urban	Richer	Improved source of drinking water	Unimproved
35	Female	15-34 years	Secondary/SSS/SHS	Never married/never lived together	15-34 years	Central	Urban	Richest	Improved source of drinking water	Unimproved
36	Female	15-34 years	Higher	Never married/never lived together	15-34 years	Western	Urban	Richest	Improved source of drinking water	Improved
37	Female	15-34 years	Higher	Never married/never lived together	15-34 years	Western	Urban	Richest	Improved source of drinking water	Unimproved
38	Female	15-34 years	Secondary/SSS/SHS	Never married/never lived together	15-34 years	Eastern	Urban	Richest	Improved source of drinking water	Unimproved
39	Female	15-34 years	Secondary/SSS/SHS	Never married/never lived together	15-34 years	Eastern	Urban	Richer	Improved source of drinking water	Unimproved
40	Female	15-34 years	Primary	Never married/never lived together	15-34 years	Volta	Urban	Richer	Improved source of drinking water	Unimproved
41	Female	15-34 years	Secondary/SSS/SHS	Never married/never lived together	15-34 years	Volta	Urban	Richer	Improved source of drinking water	Unimproved
42	Female	15-34 years	Higher	Never married/never lived together	15-34 years	Volta	Urban	Richest	Improved source of drinking water	Unimproved
43	Female	15-34 years	Middle/JSS/JHS	Never married/never lived together	15-34 years	Greater Accra	Urban	Middle	Improved source of drinking water	Unimproved
44	Female	15-34 years	Middle/JSS/JHS	Never married/never lived together	15-34 years	Greater Accra	Urban	Middle	Improved source of drinking water	Unimproved
45	Female	15-34 years	Middle/JSS/JHS	Never married/never lived together	15-34 years	Greater Accra	Urban	Middle	Improved source of drinking water	Unimproved
46	Female	15-34 years	Secondary/SSS/SHS	Never married/never lived together	15-34 years	Greater Accra	Urban	Richest	Improved source of drinking water	Unimproved
47	Female	15-34 years	Middle/JSS/JHS	Never married/never lived together	15-34 years	Greater Accra	Urban	Richer	Improved source of drinking water	Unimproved
48	Female	15-34 years	Primary	Never married/never lived together	15-34 years	Brong Ahafo	Rural	Middle	Improved source of drinking water	Unimproved
49	Female	15-34 years	Secondary/SSS/SHS	Never married/never lived together	15-34 years	Central	Rural	Richer	Improved source of drinking water	Unimproved
50	Female	15-34 years	Secondary/SSS/SHS	Never married/never lived together	15-34 years	Central	Rural	Richer	Improved source of drinking water	Unimproved
51	Female	15-34 years	Secondary/SSS/SHS	Never married/never lived together	15-34 years	Western	Urban	Richer	Improved source of drinking water	Unimproved
52	Female	15-34 years	Secondary/SSS/SHS	Never married/never lived together	15-34 years	Western	Urban	Richer	Improved source of drinking water	Unimproved
53	Female	15-34 years	Higher	Never married/never lived together	15-34 years	Western	Urban	Richest	Improved source of drinking water	Improved
54	Female	15-34 years	Secondary/SSS/SHS	Never married/never lived together	15-34 years	Western	Urban	Richer	Improved source of drinking water	Unimproved
55	Female	15-34 years	Primary	Never married/never lived together	15-34 years	Western	Rural	Middle	Improved source of drinking water	Unimproved
56	Female	15-34 years	Middle/JSS/JHS	Never married/never lived together	15-34 years	Central	Rural	Poorer	Improved source of drinking water	Unimproved
57	Female	15-34 years	Higher	Never married/never lived together	15-34 years	Central	Rural	Richer	Improved source of drinking water	Unimproved
58	Female	15-34 years	Secondary/SSS/SHS	Never married/never lived together	15-34 years	Upper West	Urban	Richer	Improved source of drinking water	Unimproved
59	Female	15-34 years	No education/preschool	Never married/never lived together	15-34 years	Brong Ahafo	Rural	Poorer	Improved source of drinking water	Unimproved
60	Female	15-34 years	Higher	Never married/never lived together	15-34 years	Brong Ahafo	Rural	Middle	Improved source of drinking water	Unimproved
61	Female	15-34 years	Secondary/SSS/SHS	Never married/never lived together	15-34 years	Ashanti	Urban	Richer	Improved source of drinking water	Unimproved
62	Female	15-34 years	Middle/JSS/JHS	Never married/never lived together	15-34 years	Ashanti	Urban	Middle	Improved source of drinking water	Unimproved
63	Female	15-34 years	Secondary/SSS/SHS	Never married/never lived together	15-34 years	Western	Rural	Richest	Improved source of drinking water	Unimproved
64	Female	15-34 years	Secondary/SSS/SHS	Never married/never lived together	15-34 years	Western	Rural	Richer	Improved source of drinking water	Unimproved
65	Female	15-34 years	Higher	Never married/never lived together	15-34 years	Upper East	Urban	Richest	Improved source of drinking water	Unimproved
66	Female	15-34 years	Secondary/SSS/SHS	Never married/never lived together	15-34 years	Upper East	Urban	Poorest	Unimproved source of drinking water	Unimproved
67	Female	15-34 years	Primary	Never married/never lived together	15-34 years	Upper East	Urban	Middle	Improved source of drinking water	Unimproved
68	Female	15-34 years	Higher	Never married/never lived together	15-34 years	Brong Ahafo	Urban	Richest	Improved source of drinking water	Improved
69	Female	15-34 years	Secondary/SSS/SHS	Never married/never lived together	15-34 years	Western	Urban	Richer	Improved source of drinking water	Unimproved
70	Female	15-34 years	Primary	Never married/never lived together	15-34 years	Western	Urban	Richer	Improved source of drinking water	Unimproved
71	Female	15-34 years	Middle/JSS/JHS	Never married/never lived together	15-34 years	Eastern	Rural	Poorer	Improved source of drinking water	Unimproved
72	Female	15-34 years	Secondary/SSS/SHS	Never married/never lived together	15-34 years	Ashanti	Urban	Richest	Improved source of drinking water	Unimproved
73	Female	15-34 years	Middle/JSS/JHS	Never married/never lived together	15-34 years	Northern	Rural	Poorest	Unimproved source of drinking water	Unimproved
74	Female	15-34 years	Secondary/SSS/SHS	Never married/never lived together	15-34 years	Upper West	Rural	Poorer	Improved source of drinking water	Unimproved
75	Female	15-34 years	Secondary/SSS/SHS	Never married/never lived together	15-34 years	Northern	Urban	Poorer	Unimproved source of drinking water	Unimproved
76	Female	15-34 years	Primary	Never married/never lived together	15-34 years	Northern	Urban	Poorer	Improved source of drinking water	Unimproved
77	Female	15-34 years	Higher	Never married/never lived together	15-34 years	Western	Urban	Richest	Improved source of drinking water	Unimproved
78	Female	15-34 years	Higher	Never married/never lived together	15-34 years	Western	Urban	Richest	Improved source of drinking water	Unimproved
79	Female	15-34 years	Higher	Never married/never lived together	15-34 years	Western	Urban	Richest	Improved source of drinking water	Unimproved
80	Female	15-34 years	Higher	Never married/never lived together	15-34 years	Western	Urban	Richest	Improved source of drinking water	Unimproved
81	Female	15-34 years	Secondary/SSS/SHS	Never married/never lived together	15-34 years	Western	Urban	Richest	Improved source of drinking water	Unimproved
82	Female	15-34 years	Secondary/SSS/SHS	Never married/never lived together	15-34 years	Western	Urban	Richer	Improved source of drinking water	Unimproved
83	Female	15-34 years	Primary	Never married/never lived together	15-34 years	Greater Accra	Urban	Richer	Improved source of drinking water	Unimproved
84	Female	15-34 years	Middle/JSS/JHS	Never married/never lived together	15-34 years	Greater Accra	Urban	Middle	Improved source of drinking water	Unimproved
85	Female	15-34 years	Middle/JSS/JHS	Never married/never lived together	15-34 years	Greater Accra	Urban	Richest	Improved source of drinking water	Unimproved
86	Female	15-34 years	Middle/JSS/JHS	Never married/never lived together	15-34 years	Greater Accra	Urban	Richer	Improved source of drinking water	Unimproved
87	Female	15-34 years	Secondary/SSS/SHS	Never married/never lived together	15-34 years	Greater Accra	Urban	Richest	Improved source of drinking water	Unimproved
88	Female	15-34 years	No education/preschool	Never married/never lived together	15-34 years	Greater Accra	Urban	Middle	Improved source of drinking water	Unimproved
89	Female	15-34 years	Secondary/SSS/SHS	Never married/never lived together	15-34 years	Greater Accra	Urban	Richer	Improved source of drinking water	Unimproved
90	Female	15-34 years	Secondary/SSS/SHS	Never married/never lived together	15-34 years	Greater Accra	Urban	Richer	Improved source of drinking water	Unimproved
91	Female	15-34 years	Higher	Never married/never lived together	15-34 years	Ashanti	Urban	Poorer	Improved source of drinking water	Unimproved
92	Female	15-34 years	Middle/JSS/JHS	Never married/never lived together	15-34 years	Eastern	Urban	Richer	Improved source of drinking water	Unimproved
93	Female	15-34 years	No education/preschool	Never married/never lived together	15-34 years	Brong Ahafo	Rural	Poorer	Improved source of drinking water	Unimproved
94	Female	15-34 years	Higher	Never married/never lived together	15-34 years	Eastern	Urban	Richest	Improved source of drinking water	Unimproved
95	Female	15-34 years	Secondary/SSS/SHS	Never married/never lived together	15-34 years	Eastern	Urban	Richer	Improved source of drinking water	Unimproved
96	Female	15-34 years	Secondary/SSS/SHS	Never married/never lived together	15-34 years	Eastern	Urban	Richer	Improved source of drinking water	Unimproved
97	Female	15-34 years	Higher	Never married/never lived together	15-34 years	Eastern	Urban	Richest	Improved source of drinking water	Unimproved
98	Female	15-34 years	Secondary/SSS/SHS	Never married/never lived together	15-34 years	Greater Accra	Urban	Richer	Improved source of drinking water	Unimproved
99	Female	15-34 years	Secondary/SSS/SHS	Never married/never lived together	15-34 years	Brong Ahafo	Urban	Richer	Improved source of drinking water	Unimproved
100	Female	15-34 years	Primary	Never married/never lived together	15-34 years	Brong Ahafo	Urban	Richest	Improved source of drinking water	Unimproved
101	Female	15-34 years	Middle/JSS/JHS	Never married/never lived together	15-34 years	Brong Ahafo	Urban	Richer	Improved source of drinking water	Unimproved
102	Female	15-34 years	Secondary/SSS/SHS	Never married/never lived together	15-34 years	Brong Ahafo	Urban	Richest	Improved source of drinking water	Unimproved
103	Female	15-34 years	Middle/JSS/JHS	Never married/never lived together	15-34 years	Ashanti	Urban	Middle	Improved source of drinking water	Unimproved
104	Female	15-34 years	Middle/JSS/JHS	Never married/never lived together	15-34 years	Ashanti	Urban	Richer	Improved source of drinking water	Unimproved
105	Female	15-34 years	Secondary/SSS/SHS	Never married/never lived together	15-34 years	Ashanti	Urban	Richest	Improved source of drinking water	Unimproved
106	Female	15-34 years	Middle/JSS/JHS	Never married/never lived together	15-34 years	Ashanti	Urban	Richer	Improved source of drinking water	Unimproved
107	Female	15-34 years	Middle/JSS/JHS	Never married/never lived together	15-34 years	Ashanti	Urban	Richer	Improved source of drinking water	Unimproved
108	Female	15-34 years	Secondary/SSS/SHS	Never married/never lived together	15-34 years	Volta	Urban	Middle	Improved source of drinking water	Unimproved
109	Female	15-34 years	Middle/JSS/JHS	Never married/never lived together	15-34 years	Volta	Urban	Middle	Improved source of drinking water	Unimproved
110	Female	15-34 years	Higher	Never married/never lived together	15-34 years	Volta	Urban	Richest	Improved source of drinking water	Unimproved
111	Female	15-34 years	Middle/JSS/JHS	Never married/never lived together	15-34 years	Volta	Urban	Richer	Improved source of drinking water	Improved
112	Female	15-34 years	Secondary/SSS/SHS	Never married/never lived together	15-34 years	Western	Urban	Richer	Improved source of drinking water	Unimproved
113	Female	15-34 years	Secondary/SSS/SHS	Never married/never lived together	15-34 years	Western	Urban	Richest	Improved source of drinking water	Unimproved
114	Female	15-34 years	Middle/JSS/JHS	Never married/never lived together	15-34 years	Western	Urban	Richer	Improved source of drinking water	Unimproved
115	Female	15-34 years	Middle/JSS/JHS	Never married/never lived together	15-34 years	Volta	Rural	Poorer	Improved source of drinking water	Unimproved
116	Female	15-34 years	Middle/JSS/JHS	Never married/never lived together	15-34 years	Ashanti	Urban	Richer	Improved source of drinking water	Unimproved
117	Female	15-34 years	Middle/JSS/JHS	Never married/never lived together	15-34 years	Ashanti	Urban	Middle	Improved source of drinking water	Unimproved
118	Female	15-34 years	Middle/JSS/JHS	Never married/never lived together	15-34 years	Greater Accra	Rural	Poorest	Unimproved source of drinking water	Unimproved
119	Female	15-34 years	Middle/JSS/JHS	Never married/never lived together	15-34 years	Eastern	Rural	Richer	Improved source of drinking water	Unimproved
120	Female	15-34 years	Higher	Never married/never lived together	15-34 years	Eastern	Rural	Richer	Improved source of drinking water	Unimproved
121	Female	15-34 years	Higher	Never married/never lived together	15-34 years	Eastern	Rural	Richer	Improved source of drinking water	Unimproved
122	Female	15-34 years	No education/preschool	Never married/never lived together	15-34 years	Western	Urban	Richer	Improved source of drinking water	Unimproved
123	Female	15-34 years	Higher	Never married/never lived together	15-34 years	Western	Urban	Richer	Improved source of drinking water	Unimproved
124	Female	15-34 years	Higher	Never married/never lived together	15-34 years	Western	Urban	Richest	Improved source of drinking water	Unimproved
125	Female	15-34 years	Middle/JSS/JHS	Never married/never lived together	15-34 years	Ashanti	Urban	Richest	Improved source of drinking water	Unimproved
126	Female	15-34 years	Higher	Never married/never lived together	15-34 years	Ashanti	Urban	Richest	Improved source of drinking water	Unimproved
127	Female	15-34 years	Middle/JSS/JHS	Never married/never lived together	15-34 years	Ashanti	Urban	Richest	Improved source of drinking water	Improved
128	Female	15-34 years	Higher	Never married/never lived together	15-34 years	Ashanti	Urban	Richest	Improved source of drinking water	Unimproved
129	Female	15-34 years	Higher	Never married/never lived together	15-34 years	Ashanti	Urban	Richest	Improved source of drinking water	Improved
130	Female	15-34 years	Primary	Never married/never lived together	15-34 years	Ashanti	Urban	Richest	Improved source of drinking water	Unimproved
131	Female	15-34 years	Higher	Never married/never lived together	15-34 years	Ashanti	Urban	Richer	Improved source of drinking water	Improved
132	Female	15-34 years	Secondary/SSS/SHS	Never married/never lived together	15-34 years	Eastern	Urban	Richer	Improved source of drinking water	Unimproved
133	Female	15-34 years	Middle/JSS/JHS	Never married/never lived together	15-34 years	Eastern	Urban	Richer	Improved source of drinking water	Unimproved
134	Female	15-34 years	Primary	Never married/never lived together	15-34 years	Eastern	Urban	Richer	Improved source of drinking water	Unimproved
135	Female	15-34 years	Primary	Never married/never lived together	15-34 years	Eastern	Urban	Middle	Improved source of drinking water	Unimproved
136	Female	15-34 years	Secondary/SSS/SHS	Never married/never lived together	15-34 years	Greater Accra	Urban	Richer	Improved source of drinking water	Unimproved
137	Female	15-34 years	Higher	Never married/never lived together	15-34 years	Eastern	Urban	Richest	Improved source of drinking water	Unimproved
138	Female	15-34 years	Secondary/SSS/SHS	Never married/never lived together	15-34 years	Eastern	Urban	Richest	Improved source of drinking water	Unimproved
139	Female	15-34 years	Secondary/SSS/SHS	Never married/never lived together	15-34 years	Eastern	Rural	Middle	Improved source of drinking water	Unimproved
140	Female	15-34 years	Secondary/SSS/SHS	Never married/never lived together	15-34 years	Western	Urban	Richer	Improved source of drinking water	Unimproved
141	Female	15-34 years	Higher	Never married/never lived together	15-34 years	Central	Rural	Richer	Improved source of drinking water	Unimproved
142	Female	15-34 years	Secondary/SSS/SHS	Never married/never lived together	15-34 years	Central	Rural	Richer	Improved source of drinking water	Improved
143	Female	15-34 years	Higher	Never married/never lived together	15-34 years	Central	Rural	Richer	Improved source of drinking water	Unimproved
144	Female	15-34 years	Middle/JSS/JHS	Never married/never lived together	15-34 years	Brong Ahafo	Urban	Middle	Improved source of drinking water	Unimproved
145	Female	15-34 years	Secondary/SSS/SHS	Never married/never lived together	15-34 years	Brong Ahafo	Urban	Richer	Improved source of drinking water	Unimproved
146	Female	15-34 years	Secondary/SSS/SHS	Never married/never lived together	15-34 years	Brong Ahafo	Urban	Richer	Improved source of drinking water	Unimproved
147	Female	15-34 years	Middle/JSS/JHS	Never married/never lived together	15-34 years	Brong Ahafo	Urban	Middle	Improved source of drinking water	Unimproved
148	Female	15-34 years	Secondary/SSS/SHS	Never married/never lived together	15-34 years	Brong Ahafo	Urban	Middle	Improved source of drinking water	Unimproved
149	Female	15-34 years	Primary	Never married/never lived together	15-34 years	Brong Ahafo	Urban	Richer	Improved source of drinking water	Unimproved
150	Female	15-34 years	Secondary/SSS/SHS	Never married/never lived together	15-34 years	Greater Accra	Urban	Richer	Improved source of drinking water	Unimproved
151	Female	15-34 years	Secondary/SSS/SHS	Never married/never lived together	15-34 years	Greater Accra	Urban	Richer	Improved source of drinking water	Unimproved
152	Female	15-34 years	Secondary/SSS/SHS	Never married/never lived together	15-34 years	Greater Accra	Urban	Richer	Improved source of drinking water	Unimproved
153	Female	15-34 years	Secondary/SSS/SHS	Never married/never lived together	15-34 years	Brong Ahafo	Urban	Middle	Improved source of drinking water	Unimproved
154	Female	15-34 years	Secondary/SSS/SHS	Never married/never lived together	15-34 years	Brong Ahafo	Urban	Richer	Improved source of drinking water	Unimproved
155	Female	15-34 years	Middle/JSS/JHS	Never married/never lived together	15-34 years	Greater Accra	Urban	Middle	Improved source of drinking water	Unimproved
156	Female	15-34 years	Primary	Never married/never lived together	15-34 years	Greater Accra	Urban	Middle	Improved source of drinking water	Unimproved
157	Female	15-34 years	No education/preschool	Never married/never lived together	15-34 years	Greater Accra	Urban	Middle	Improved source of drinking water	Unimproved
158	Female	15-34 years	No education/preschool	Never married/never lived together	15-34 years	Western	Urban	Middle	Improved source of drinking water	Unimproved
159	Female	15-34 years	Secondary/SSS/SHS	Never married/never lived together	15-34 years	Western	Urban	Richest	Improved source of drinking water	Unimproved
160	Female	15-34 years	Secondary/SSS/SHS	Never married/never lived together	15-34 years	Western	Urban	Richer	Improved source of drinking water	Unimproved
161	Female	15-34 years	Secondary/SSS/SHS	Never married/never lived together	15-34 years	Greater Accra	Urban	Richest	Improved source of drinking water	Improved
162	Female	15-34 years	Secondary/SSS/SHS	Never married/never lived together	15-34 years	Greater Accra	Urban	Richest	Improved source of drinking water	Improved
163	Female	15-34 years	Higher	Never married/never lived together	15-34 years	Greater Accra	Urban	Richest	Improved source of drinking water	Improved
164	Female	15-34 years	Secondary/SSS/SHS	Never married/never lived together	15-34 years	Greater Accra	Urban	Richest	Improved source of drinking water	Unimproved
165	Female	15-34 years	Higher	Never married/never lived together	15-34 years	Greater Accra	Urban	Richest	Improved source of drinking water	Improved
166	Female	15-34 years	Middle/JSS/JHS	Never married/never lived together	15-34 years	Greater Accra	Urban	Richer	Improved source of drinking water	Unimproved
167	Female	15-34 years	Higher	Never married/never lived together	15-34 years	Greater Accra	Urban	Richest	Improved source of drinking water	Unimproved
168	Female	15-34 years	Secondary/SSS/SHS	Never married/never lived together	15-34 years	Western	Rural	Richer	Improved source of drinking water	Unimproved
169	Female	15-34 years	Middle/JSS/JHS	Never married/never lived together	15-34 years	Western	Rural	Richer	Improved source of drinking water	Unimproved
170	Female	15-34 years	Middle/JSS/JHS	Never married/never lived together	15-34 years	Western	Rural	Richer	Improved source of drinking water	Unimproved
171	Female	15-34 years	Middle/JSS/JHS	Never married/never lived together	15-34 years	Western	Rural	Middle	Improved source of drinking water	Unimproved
172	Female	15-34 years	No education/preschool	Never married/never lived together	15-34 years	Western	Rural	Richer	Improved source of drinking water	Unimproved
173	Female	15-34 years	Secondary/SSS/SHS	Never married/never lived together	15-34 years	Western	Rural	Richer	Improved source of drinking water	Unimproved
174	Female	15-34 years	Secondary/SSS/SHS	Never married/never lived together	15-34 years	Brong Ahafo	Rural	Poorer	Improved source of drinking water	Unimproved
175	Female	15-34 years	Middle/JSS/JHS	Never married/never lived together	15-34 years	Brong Ahafo	Rural	Poorer	Improved source of drinking water	Unimproved
176	Female	15-34 years	Middle/JSS/JHS	Never married/never lived together	15-34 years	Greater Accra	Urban	Middle	Improved source of drinking water	Unimproved
177	Female	15-34 years	Middle/JSS/JHS	Never married/never lived together	15-34 years	Greater Accra	Urban	Richer	Improved source of drinking water	Unimproved
178	Female	15-34 years	Middle/JSS/JHS	Never married/never lived together	15-34 years	Western	Urban	Richest	Improved source of drinking water	Improved
179	Female	15-34 years	Secondary/SSS/SHS	Never married/never lived together	15-34 years	Greater Accra	Urban	Richest	Improved source of drinking water	Unimproved
180	Female	15-34 years	Secondary/SSS/SHS	Never married/never lived together	15-34 years	Brong Ahafo	Urban	Middle	Improved source of drinking water	Unimproved
181	Female	15-34 years	Secondary/SSS/SHS	Never married/never lived together	15-34 years	Brong Ahafo	Urban	Middle	Improved source of drinking water	Unimproved
182	Female	15-34 years	Middle/JSS/JHS	Never married/never lived together	15-34 years	Brong Ahafo	Urban	Richer	Improved source of drinking water	Unimproved
183	Female	15-34 years	Middle/JSS/JHS	Never married/never lived together	15-34 years	Greater Accra	Urban	Richer	Improved source of drinking water	Unimproved
184	Female	15-34 years	Middle/JSS/JHS	Never married/never lived together	15-34 years	Central	Urban	Poorer	Improved source of drinking water	Unimproved
185	Female	15-34 years	Primary	Never married/never lived together	15-34 years	Brong Ahafo	Urban	Richer	Improved source of drinking water	Unimproved
186	Female	15-34 years	No education/preschool	Never married/never lived together	15-34 years	Brong Ahafo	Urban	Middle	Improved source of drinking water	Unimproved
187	Female	15-34 years	Secondary/SSS/SHS	Never married/never lived together	15-34 years	Brong Ahafo	Urban	Middle	Improved source of drinking water	Unimproved
188	Female	15-34 years	Secondary/SSS/SHS	Never married/never lived together	15-34 years	Greater Accra	Rural	Richer	Improved source of drinking water	Unimproved
189	Female	15-34 years	Secondary/SSS/SHS	Never married/never lived together	15-34 years	Greater Accra	Rural	Richer	Improved source of drinking water	Unimproved
190	Female	15-34 years	Higher	Never married/never lived together	15-34 years	Greater Accra	Rural	Richer	Improved source of drinking water	Unimproved
191	Female	15-34 years	Middle/JSS/JHS	Never married/never lived together	15-34 years	Central	Urban	Richer	Improved source of drinking water	Unimproved
192	Female	15-34 years	Higher	Never married/never lived together	15-34 years	Central	Urban	Richest	Improved source of drinking water	Unimproved
193	Female	15-34 years	Higher	Never married/never lived together	15-34 years	Central	Urban	Richest	Improved source of drinking water	Improved
194	Female	15-34 years	Middle/JSS/JHS	Never married/never lived together	15-34 years	Eastern	Urban	Richer	Improved source of drinking water	Unimproved
195	Female	15-34 years	Secondary/SSS/SHS	Never married/never lived together	15-34 years	Brong Ahafo	Urban	Middle	Improved source of drinking water	Unimproved
196	Female	15-34 years	Higher	Never married/never lived together	15-34 years	Northern	Urban	Richest	Improved source of drinking water	Unimproved
197	Female	15-34 years	Secondary/SSS/SHS	Never married/never lived together	15-34 years	Greater Accra	Urban	Middle	Improved source of drinking water	Unimproved
198	Female	15-34 years	Middle/JSS/JHS	Never married/never lived together	15-34 years	Greater Accra	Urban	Richest	Improved source of drinking water	Unimproved
199	Female	15-34 years	Primary	Never married/never lived together	15-34 years	Greater Accra	Urban	Richest	Improved source of drinking water	Unimproved
200	Female	15-34 years	Higher	Never married/never lived together	15-34 years	Western	Urban	Richer	Improved source of drinking water	Unimproved
201	Female	15-34 years	Secondary/SSS/SHS	Never married/never lived together	15-34 years	Upper East	Urban	Richer	Improved source of drinking water	Unimproved
202	Female	15-34 years	Middle/JSS/JHS	Never married/never lived together	15-34 years	Eastern	Urban	Middle	Improved source of drinking water	Unimproved
203	Female	15-34 years	Middle/JSS/JHS	Never married/never lived together	15-34 years	Volta	Rural	Richer	Improved source of drinking water	Unimproved
204	Female	15-34 years	Primary	Never married/never lived together	15-34 years	Eastern	Urban	Richer	Improved source of drinking water	Unimproved
205	Female	15-34 years	Secondary/SSS/SHS	Never married/never lived together	15-34 years	Eastern	Urban	Richest	Improved source of drinking water	Unimproved
206	Female	15-34 years	Higher	Never married/never lived together	15-34 years	Volta	Urban	Richest	Improved source of drinking water	Unimproved
207	Female	15-34 years	Higher	Never married/never lived together	15-34 years	Volta	Urban	Richer	Improved source of drinking water	Unimproved
208	Female	15-34 years	Higher	Never married/never lived together	15-34 years	Volta	Urban	Richest	Improved source of drinking water	Unimproved
209	Female	15-34 years	Middle/JSS/JHS	Never married/never lived together	15-34 years	Volta	Urban	Richer	Improved source of drinking water	Unimproved
210	Female	15-34 years	Secondary/SSS/SHS	Never married/never lived together	15-34 years	Volta	Urban	Richer	Improved source of drinking water	Unimproved
211	Female	15-34 years	Middle/JSS/JHS	Never married/never lived together	15-34 years	Brong Ahafo	Rural	Middle	Improved source of drinking water	Unimproved
212	Female	15-34 years	Middle/JSS/JHS	Never married/never lived together	15-34 years	Brong Ahafo	Rural	Poorer	Improved source of drinking water	Unimproved
213	Female	15-34 years	Middle/JSS/JHS	Never married/never lived together	15-34 years	Brong Ahafo	Rural	Poorer	Improved source of drinking water	Unimproved
214	Female	15-34 years	Secondary/SSS/SHS	Never married/never lived together	15-34 years	Greater Accra	Urban	Richest	Improved source of drinking water	Unimproved
215	Female	15-34 years	Higher	Never married/never lived together	15-34 years	Greater Accra	Urban	Richest	Improved source of drinking water	Unimproved
216	Female	15-34 years	Higher	Never married/never lived together	15-34 years	Greater Accra	Urban	Richest	Improved source of drinking water	Unimproved
217	Female	15-34 years	Higher	Never married/never lived together	15-34 years	Greater Accra	Urban	Richest	Improved source of drinking water	Improved
218	Female	15-34 years	Middle/JSS/JHS	Never married/never lived together	15-34 years	Upper East	Urban	Poorest	Improved source of drinking water	Unimproved
219	Female	15-34 years	Secondary/SSS/SHS	Never married/never lived together	15-34 years	Greater Accra	Urban	Richest	Improved source of drinking water	Improved
220	Female	15-34 years	Middle/JSS/JHS	Never married/never lived together	15-34 years	Greater Accra	Urban	Richest	Improved source of drinking water	Unimproved
221	Female	15-34 years	Primary	Never married/never lived together	15-34 years	Upper East	Rural	Poorest	Improved source of drinking water	Unimproved
222	Female	15-34 years	Middle/JSS/JHS	Never married/never lived together	15-34 years	Brong Ahafo	Urban	Poorer	Improved source of drinking water	Unimproved
223	Female	15-34 years	Higher	Never married/never lived together	15-34 years	Brong Ahafo	Urban	Richest	Improved source of drinking water	Improved
224	Female	15-34 years	Secondary/SSS/SHS	Never married/never lived together	15-34 years	Brong Ahafo	Urban	Middle	Improved source of drinking water	Unimproved
225	Female	15-34 years	Primary	Never married/never lived together	15-34 years	Brong Ahafo	Urban	Middle	Improved source of drinking water	Unimproved
226	Female	15-34 years	Middle/JSS/JHS	Never married/never lived together	15-34 years	Brong Ahafo	Urban	Poorer	Improved source of drinking water	Unimproved
227	Female	15-34 years	Secondary/SSS/SHS	Never married/never lived together	15-34 years	Upper East	Urban	Middle	Improved source of drinking water	Unimproved
228	Female	15-34 years	Secondary/SSS/SHS	Never married/never lived together	15-34 years	Ashanti	Urban	Richer	Improved source of drinking water	Unimproved
229	Female	15-34 years	Higher	Never married/never lived together	15-34 years	Ashanti	Urban	Richest	Improved source of drinking water	Unimproved
230	Female	15-34 years	Middle/JSS/JHS	Never married/never lived together	15-34 years	Central	Urban	Richer	Improved source of drinking water	Unimproved
231	Female	15-34 years	Middle/JSS/JHS	Never married/never lived together	15-34 years	Greater Accra	Urban	Richer	Improved source of drinking water	Unimproved
232	Female	15-34 years	Middle/JSS/JHS	Never married/never lived together	15-34 years	Greater Accra	Urban	Richest	Improved source of drinking water	Unimproved
233	Female	15-34 years	Secondary/SSS/SHS	Never married/never lived together	15-34 years	Volta	Urban	Richer	Improved source of drinking water	Unimproved
234	Female	15-34 years	Secondary/SSS/SHS	Never married/never lived together	15-34 years	Volta	Urban	Middle	Improved source of drinking water	Unimproved
235	Female	15-34 years	Primary	Never married/never lived together	15-34 years	Volta	Urban	Richest	Improved source of drinking water	Unimproved
236	Female	15-34 years	Middle/JSS/JHS	Never married/never lived together	15-34 years	Eastern	Rural	Poorer	Improved source of drinking water	Unimproved
237	Female	15-34 years	Secondary/SSS/SHS	Never married/never lived together	15-34 years	Eastern	Rural	Richer	Improved source of drinking water	Improved
238	Female	15-34 years	Secondary/SSS/SHS	Never married/never lived together	15-34 years	Eastern	Rural	Richer	Improved source of drinking water	Unimproved
239	Female	15-34 years	Middle/JSS/JHS	Never married/never lived together	15-34 years	Eastern	Rural	Middle	Improved source of drinking water	Unimproved
240	Female	15-34 years	Higher	Never married/never lived together	15-34 years	Greater Accra	Urban	Richer	Improved source of drinking water	Unimproved
241	Female	15-34 years	Middle/JSS/JHS	Never married/never lived together	15-34 years	Western	Urban	Middle	Improved source of drinking water	Unimproved
242	Female	15-34 years	Primary	Never married/never lived together	15-34 years	Central	Rural	Middle	Improved source of drinking water	Unimproved
243	Female	15-34 years	Middle/JSS/JHS	Never married/never lived together	15-34 years	Central	Rural	Poorer	Improved source of drinking water	Unimproved
244	Female	15-34 years	Middle/JSS/JHS	Never married/never lived together	15-34 years	Central	Rural	Richer	Improved source of drinking water	Unimproved
245	Female	15-34 years	Middle/JSS/JHS	Never married/never lived together	15-34 years	Central	Rural	Middle	Improved source of drinking water	Unimproved
246	Female	15-34 years	Middle/JSS/JHS	Never married/never lived together	15-34 years	Central	Rural	Middle	Improved source of drinking water	Unimproved
247	Female	15-34 years	Secondary/SSS/SHS	Never married/never lived together	15-34 years	Eastern	Urban	Richer	Improved source of drinking water	Unimproved
248	Female	15-34 years	Primary	Never married/never lived together	15-34 years	Eastern	Urban	Middle	Improved source of drinking water	Unimproved
249	Female	15-34 years	Middle/JSS/JHS	Never married/never lived together	15-34 years	Ashanti	Urban	Richer	Improved source of drinking water	Unimproved
250	Female	15-34 years	Secondary/SSS/SHS	Never married/never lived together	15-34 years	Ashanti	Urban	Richest	Improved source of drinking water	Unimproved
251	Female	15-34 years	Middle/JSS/JHS	Never married/never lived together	15-34 years	Ashanti	Urban	Richer	Improved source of drinking water	Unimproved
252	Female	15-34 years	No education/preschool	Never married/never lived together	15-34 years	Greater Accra	Urban	Middle	Improved source of drinking water	Unimproved
253	Female	15-34 years	Higher	Never married/never lived together	15-34 years	Greater Accra	Urban	Richest	Improved source of drinking water	Improved
254	Female	15-34 years	No education/preschool	Never married/never lived together	15-34 years	Eastern	Urban	Middle	Unimproved source of drinking water	Unimproved
255	Female	15-34 years	Secondary/SSS/SHS	Never married/never lived together	15-34 years	Eastern	Urban	Richest	Improved source of drinking water	Unimproved
256	Female	15-34 years	Secondary/SSS/SHS	Never married/never lived together	15-34 years	Eastern	Urban	Richer	Improved source of drinking water	Unimproved
257	Female	15-34 years	Middle/JSS/JHS	Never married/never lived together	15-34 years	Eastern	Urban	Middle	Improved source of drinking water	Unimproved
258	Female	15-34 years	Middle/JSS/JHS	Never married/never lived together	15-34 years	Eastern	Urban	Richest	Improved source of drinking water	Unimproved
259	Female	15-34 years	Middle/JSS/JHS	Never married/never lived together	15-34 years	Eastern	Urban	Richest	Improved source of drinking water	Unimproved
260	Female	15-34 years	Middle/JSS/JHS	Never married/never lived together	15-34 years	Eastern	Urban	Richest	Improved source of drinking water	Unimproved
261	Female	15-34 years	Higher	Never married/never lived together	15-34 years	Central	Urban	Richer	Improved source of drinking water	Unimproved
262	Female	15-34 years	Higher	Never married/never lived together	15-34 years	Central	Urban	Richest	Improved source of drinking water	Unimproved
263	Female	15-34 years	Higher	Never married/never lived together	15-34 years	Central	Urban	Richest	Improved source of drinking water	Unimproved
264	Female	15-34 years	Middle/JSS/JHS	Never married/never lived together	15-34 years	Brong Ahafo	Urban	Richer	Improved source of drinking water	Unimproved
265	Female	15-34 years	Middle/JSS/JHS	Never married/never lived together	15-34 years	Brong Ahafo	Urban	Middle	Improved source of drinking water	Unimproved
266	Female	15-34 years	Secondary/SSS/SHS	Never married/never lived together	15-34 years	Brong Ahafo	Urban	Poorer	Improved source of drinking water	Unimproved
267	Female	15-34 years	Middle/JSS/JHS	Never married/never lived together	15-34 years	Brong Ahafo	Urban	Richest	Improved source of drinking water	Unimproved
268	Female	15-34 years	Middle/JSS/JHS	Never married/never lived together	15-34 years	Eastern	Rural	Middle	Improved source of drinking water	Unimproved
269	Female	15-34 years	Middle/JSS/JHS	Never married/never lived together	15-34 years	Volta	Rural	Middle	Improved source of drinking water	Unimproved
270	Female	15-34 years	Primary	Never married/never lived together	15-34 years	Volta	Rural	Middle	Improved source of drinking water	Unimproved
271	Female	15-34 years	Middle/JSS/JHS	Never married/never lived together	15-34 years	Ashanti	Urban	Middle	Improved source of drinking water	Unimproved
272	Female	15-34 years	Middle/JSS/JHS	Never married/never lived together	15-34 years	Ashanti	Urban	Richer	Improved source of drinking water	Unimproved
273	Female	15-34 years	Middle/JSS/JHS	Never married/never lived together	15-34 years	Volta	Rural	Poorer	Improved source of drinking water	Unimproved
274	Female	15-34 years	Middle/JSS/JHS	Never married/never lived together	15-34 years	Volta	Rural	Poorer	Unimproved source of drinking water	Unimproved
275	Female	15-34 years	Secondary/SSS/SHS	Never married/never lived together	15-34 years	Volta	Urban	Middle	Unimproved source of drinking water	Unimproved
276	Female	15-34 years	Higher	Never married/never lived together	15-34 years	Volta	Urban	Richest	Improved source of drinking water	Improved
277	Female	15-34 years	Middle/JSS/JHS	Never married/never lived together	15-34 years	Western	Urban	Richest	Improved source of drinking water	Unimproved
278	Female	15-34 years	Middle/JSS/JHS	Never married/never lived together	15-34 years	Western	Urban	Richest	Improved source of drinking water	Improved
279	Female	15-34 years	Higher	Never married/never lived together	15-34 years	Brong Ahafo	Rural	Middle	Improved source of drinking water	Improved
280	Female	15-34 years	Secondary/SSS/SHS	Never married/never lived together	15-34 years	Eastern	Rural	Poorer	Improved source of drinking water	Unimproved
281	Female	15-34 years	Middle/JSS/JHS	Never married/never lived together	15-34 years	Central	Urban	Richest	Improved source of drinking water	Unimproved
282	Female	15-34 years	Secondary/SSS/SHS	Never married/never lived together	15-34 years	Central	Urban	Richest	Improved source of drinking water	Unimproved
283	Female	15-34 years	Secondary/SSS/SHS	Never married/never lived together	15-34 years	Central	Urban	Richest	Improved source of drinking water	Unimproved
284	Female	15-34 years	Higher	Never married/never lived together	15-34 years	Central	Urban	Richest	Improved source of drinking water	Unimproved
285	Female	15-34 years	Secondary/SSS/SHS	Never married/never lived together	15-34 years	Upper East	Rural	Poorer	Improved source of drinking water	Unimproved
286	Female	15-34 years	Higher	Never married/never lived together	15-34 years	Greater Accra	Rural	Richest	Improved source of drinking water	Unimproved
287	Female	15-34 years	Primary	Never married/never lived together	15-34 years	Greater Accra	Rural	Poorer	Improved source of drinking water	Unimproved
288	Female	15-34 years	Higher	Never married/never lived together	15-34 years	Upper East	Urban	Richest	Improved source of drinking water	Unimproved
289	Female	15-34 years	Higher	Never married/never lived together	15-34 years	Upper East	Urban	Richest	Improved source of drinking water	Unimproved
290	Female	15-34 years	Secondary/SSS/SHS	Never married/never lived together	15-34 years	Greater Accra	Urban	Richer	Improved source of drinking water	Unimproved
291	Female	15-34 years	Middle/JSS/JHS	Never married/never lived together	15-34 years	Volta	Rural	Poorer	Improved source of drinking water	Unimproved
292	Female	15-34 years	Middle/JSS/JHS	Never married/never lived together	15-34 years	Eastern	Rural	Middle	Improved source of drinking water	Unimproved
293	Female	15-34 years	Primary	Never married/never lived together	15-34 years	Central	Urban	Poorer	Improved source of drinking water	Unimproved
294	Female	15-34 years	Secondary/SSS/SHS	Never married/never lived together	15-34 years	Ashanti	Urban	Richer	Improved source of drinking water	Unimproved
295	Female	15-34 years	Primary	Never married/never lived together	15-34 years	Ashanti	Urban	Middle	Improved source of drinking water	Unimproved
296	Female	15-34 years	Higher	Never married/never lived together	15-34 years	Ashanti	Urban	Richer	Improved source of drinking water	Unimproved
297	Female	15-34 years	Primary	Never married/never lived together	15-34 years	Western	Rural	Richer	Improved source of drinking water	Unimproved
298	Female	15-34 years	Middle/JSS/JHS	Never married/never lived together	15-34 years	Western	Rural	Middle	Improved source of drinking water	Unimproved
299	Female	15-34 years	No education/preschool	Never married/never lived together	15-34 years	Western	Rural	Middle	Improved source of drinking water	Unimproved
300	Female	15-34 years	Middle/JSS/JHS	Never married/never lived together	15-34 years	Ashanti	Urban	Richest	Improved source of drinking water	Unimproved
301	Female	15-34 years	Middle/JSS/JHS	Never married/never lived together	15-34 years	Western	Urban	Richer	Improved source of drinking water	Unimproved
302	Female	15-34 years	Middle/JSS/JHS	Never married/never lived together	15-34 years	Brong Ahafo	Urban	Richer	Improved source of drinking water	Unimproved
303	Female	15-34 years	Middle/JSS/JHS	Never married/never lived together	15-34 years	Eastern	Urban	Richest	Improved source of drinking water	Unimproved
304	Female	15-34 years	Primary	Never married/never lived together	15-34 years	Eastern	Urban	Middle	Improved source of drinking water	Unimproved
305	Female	15-34 years	Middle/JSS/JHS	Never married/never lived together	15-34 years	Greater Accra	Urban	Middle	Improved source of drinking water	Unimproved
306	Female	15-34 years	No education/preschool	Never married/never lived together	15-34 years	Greater Accra	Urban	Middle	Improved source of drinking water	Unimproved
307	Female	15-34 years	Primary	Never married/never lived together	15-34 years	Greater Accra	Urban	Richer	Improved source of drinking water	Unimproved
308	Female	15-34 years	No education/preschool	Never married/never lived together	15-34 years	Greater Accra	Urban	Middle	Improved source of drinking water	Unimproved
309	Female	15-34 years	Secondary/SSS/SHS	Never married/never lived together	15-34 years	Ashanti	Urban	Richest	Improved source of drinking water	Unimproved
310	Female	15-34 years	Middle/JSS/JHS	Never married/never lived together	15-34 years	Western	Urban	Poorer	Improved source of drinking water	Unimproved
311	Female	15-34 years	Middle/JSS/JHS	Never married/never lived together	15-34 years	Western	Urban	Richest	Improved source of drinking water	Unimproved
312	Female	15-34 years	Higher	Never married/never lived together	15-34 years	Upper West	Rural	Middle	Improved source of drinking water	Unimproved
313	Female	15-34 years	Higher	Never married/never lived together	15-34 years	Upper West	Rural	Richer	Improved source of drinking water	Unimproved
314	Female	15-34 years	Higher	Never married/never lived together	15-34 years	Upper West	Rural	Middle	Improved source of drinking water	Unimproved
315	Female	15-34 years	Primary	Never married/never lived together	15-34 years	Eastern	Rural	Poorer	Unimproved source of drinking water	Unimproved
316	Female	15-34 years	Middle/JSS/JHS	Never married/never lived together	15-34 years	Eastern	Rural	Poorest	Unimproved source of drinking water	Unimproved
317	Female	15-34 years	Middle/JSS/JHS	Never married/never lived together	15-34 years	Central	Rural	Middle	Improved source of drinking water	Unimproved
318	Female	15-34 years	Secondary/SSS/SHS	Never married/never lived together	15-34 years	Central	Rural	Richer	Improved source of drinking water	Unimproved
319	Female	15-34 years	Secondary/SSS/SHS	Never married/never lived together	15-34 years	Greater Accra	Urban	Richest	Improved source of drinking water	Improved
320	Female	15-34 years	Middle/JSS/JHS	Never married/never lived together	15-34 years	Greater Accra	Urban	Middle	Improved source of drinking water	Unimproved
321	Female	15-34 years	Secondary/SSS/SHS	Never married/never lived together	15-34 years	Eastern	Urban	Richer	Improved source of drinking water	Unimproved
322	Female	15-34 years	Middle/JSS/JHS	Never married/never lived together	15-34 years	Eastern	Urban	Richer	Improved source of drinking water	Unimproved
323	Female	15-34 years	Middle/JSS/JHS	Never married/never lived together	15-34 years	Eastern	Urban	Richer	Improved source of drinking water	Unimproved
324	Female	15-34 years	Middle/JSS/JHS	Never married/never lived together	15-34 years	Upper West	Urban	Middle	Improved source of drinking water	Unimproved
325	Female	15-34 years	Primary	Never married/never lived together	15-34 years	Ashanti	Rural	Middle	Improved source of drinking water	Unimproved
326	Female	15-34 years	Higher	Never married/never lived together	15-34 years	Central	Urban	Richest	Improved source of drinking water	Unimproved
327	Female	15-34 years	Higher	Never married/never lived together	15-34 years	Central	Urban	Richest	Improved source of drinking water	Unimproved
328	Female	15-34 years	Middle/JSS/JHS	Never married/never lived together	15-34 years	Ashanti	Rural	Richer	Improved source of drinking water	Unimproved
329	Female	15-34 years	Secondary/SSS/SHS	Never married/never lived together	15-34 years	Ashanti	Rural	Richer	Improved source of drinking water	Unimproved
330	Female	15-34 years	Secondary/SSS/SHS	Never married/never lived together	15-34 years	Eastern	Urban	Richest	Improved source of drinking water	Unimproved
331	Female	15-34 years	Middle/JSS/JHS	Never married/never lived together	15-34 years	Central	Rural	Middle	Improved source of drinking water	Unimproved
332	Female	15-34 years	Higher	Never married/never lived together	15-34 years	Greater Accra	Urban	Richest	Improved source of drinking water	Unimproved
333	Female	15-34 years	Secondary/SSS/SHS	Never married/never lived together	15-34 years	Greater Accra	Urban	Richest	Improved source of drinking water	Unimproved
334	Female	15-34 years	Middle/JSS/JHS	Never married/never lived together	15-34 years	Ashanti	Urban	Richer	Improved source of drinking water	Improved
335	Female	15-34 years	Secondary/SSS/SHS	Never married/never lived together	15-34 years	Northern	Urban	Richest	Improved source of drinking water	Unimproved
336	Female	15-34 years	Middle/JSS/JHS	Never married/never lived together	15-34 years	Northern	Urban	Richer	Improved source of drinking water	Unimproved
337	Female	15-34 years	Secondary/SSS/SHS	Never married/never lived together	15-34 years	Northern	Urban	Richest	Improved source of drinking water	Improved
338	Female	15-34 years	Higher	Never married/never lived together	15-34 years	Ashanti	Rural	Richer	Improved source of drinking water	Unimproved
339	Female	15-34 years	Higher	Never married/never lived together	15-34 years	Ashanti	Rural	Richer	Improved source of drinking water	Unimproved
340	Female	15-34 years	Primary	Never married/never lived together	15-34 years	Eastern	Rural	Poorer	Unimproved source of drinking water	Unimproved
341	Female	15-34 years	Secondary/SSS/SHS	Never married/never lived together	15-34 years	Eastern	Urban	Richer	Improved source of drinking water	Unimproved
342	Female	15-34 years	Middle/JSS/JHS	Never married/never lived together	15-34 years	Eastern	Urban	Middle	Improved source of drinking water	Improved
343	Female	15-34 years	Middle/JSS/JHS	Never married/never lived together	15-34 years	Eastern	Urban	Middle	Improved source of drinking water	Unimproved
344	Female	15-34 years	No education/preschool	Never married/never lived together	15-34 years	Volta	Rural	Poorer	Improved source of drinking water	Unimproved
345	Female	15-34 years	Higher	Never married/never lived together	15-34 years	Greater Accra	Urban	Richest	Improved source of drinking water	Improved
346	Female	15-34 years	Middle/JSS/JHS	Never married/never lived together	15-34 years	Greater Accra	Urban	Richest	Improved source of drinking water	Improved
347	Female	15-34 years	Secondary/SSS/SHS	Never married/never lived together	15-34 years	Greater Accra	Urban	Richer	Improved source of drinking water	Unimproved
348	Female	15-34 years	Higher	Never married/never lived together	15-34 years	Greater Accra	Urban	Richest	Improved source of drinking water	Improved
349	Female	15-34 years	No education/preschool	Never married/never lived together	15-34 years	Greater Accra	Urban	Richer	Improved source of drinking water	Unimproved
350	Female	15-34 years	Middle/JSS/JHS	Never married/never lived together	15-34 years	Western	Rural	Middle	Improved source of drinking water	Unimproved
351	Female	15-34 years	Secondary/SSS/SHS	Never married/never lived together	15-34 years	Greater Accra	Urban	Richest	Improved source of drinking water	Unimproved
352	Female	15-34 years	Higher	Never married/never lived together	15-34 years	Greater Accra	Urban	Richest	Improved source of drinking water	Improved
353	Female	15-34 years	Secondary/SSS/SHS	Never married/never lived together	15-34 years	Greater Accra	Urban	Richest	Improved source of drinking water	Unimproved
354	Female	15-34 years	Secondary/SSS/SHS	Never married/never lived together	15-34 years	Northern	Rural	Richer	Improved source of drinking water	Unimproved
355	Female	15-34 years	Middle/JSS/JHS	Never married/never lived together	15-34 years	Central	Urban	Richest	Improved source of drinking water	Unimproved
356	Female	15-34 years	Higher	Never married/never lived together	15-34 years	Central	Urban	Richest	Improved source of drinking water	Improved
357	Female	15-34 years	Secondary/SSS/SHS	Never married/never lived together	15-34 years	Central	Urban	Richer	Improved source of drinking water	Unimproved
358	Female	15-34 years	Middle/JSS/JHS	Never married/never lived together	15-34 years	Western	Rural	Poorer	Improved source of drinking water	Unimproved
359	Female	15-34 years	Secondary/SSS/SHS	Never married/never lived together	15-34 years	Upper East	Urban	Richer	Improved source of drinking water	Unimproved
360	Female	15-34 years	Middle/JSS/JHS	Never married/never lived together	15-34 years	Volta	Urban	Middle	Improved source of drinking water	Unimproved
361	Female	15-34 years	Middle/JSS/JHS	Never married/never lived together	15-34 years	Brong Ahafo	Rural	Poorer	Improved source of drinking water	Unimproved
362	Female	15-34 years	Secondary/SSS/SHS	Never married/never lived together	15-34 years	Western	Urban	Richer	Improved source of drinking water	Unimproved
363	Female	15-34 years	Middle/JSS/JHS	Never married/never lived together	15-34 years	Western	Urban	Richest	Improved source of drinking water	Unimproved
364	Female	15-34 years	Primary	Never married/never lived together	15-34 years	Western	Urban	Richer	Improved source of drinking water	Unimproved
365	Female	15-34 years	Middle/JSS/JHS	Never married/never lived together	15-34 years	Western	Rural	Middle	Improved source of drinking water	Unimproved
366	Female	15-34 years	Middle/JSS/JHS	Never married/never lived together	15-34 years	Western	Rural	Poorer	Improved source of drinking water	Unimproved
367	Female	15-34 years	Middle/JSS/JHS	Never married/never lived together	15-34 years	Western	Rural	Middle	Improved source of drinking water	Unimproved
368	Female	15-34 years	Middle/JSS/JHS	Never married/never lived together	15-34 years	Western	Rural	Middle	Improved source of drinking water	Unimproved
369	Female	15-34 years	Middle/JSS/JHS	Never married/never lived together	15-34 years	Eastern	Rural	Middle	Improved source of drinking water	Unimproved
370	Female	15-34 years	Higher	Never married/never lived together	15-34 years	Eastern	Rural	Richer	Improved source of drinking water	Unimproved
371	Female	15-34 years	Secondary/SSS/SHS	Never married/never lived together	15-34 years	Eastern	Rural	Middle	Improved source of drinking water	Unimproved
372	Female	15-34 years	Secondary/SSS/SHS	Never married/never lived together	15-34 years	Central	Rural	Middle	Improved source of drinking water	Unimproved
373	Female	15-34 years	Secondary/SSS/SHS	Never married/never lived together	15-34 years	Central	Rural	Middle	Improved source of drinking water	Unimproved
374	Female	15-34 years	Secondary/SSS/SHS	Never married/never lived together	15-34 years	Central	Rural	Richer	Improved source of drinking water	Unimproved
375	Female	15-34 years	No education/preschool	Never married/never lived together	15-34 years	Central	Rural	Richer	Improved source of drinking water	Unimproved
376	Female	15-34 years	Middle/JSS/JHS	Never married/never lived together	15-34 years	Upper West	Urban	Middle	Improved source of drinking water	Unimproved
377	Female	15-34 years	Middle/JSS/JHS	Never married/never lived together	15-34 years	Volta	Rural	Poorest	Improved source of drinking water	Unimproved
378	Female	15-34 years	Secondary/SSS/SHS	Never married/never lived together	15-34 years	Upper East	Urban	Middle	Improved source of drinking water	Unimproved
379	Female	15-34 years	Middle/JSS/JHS	Never married/never lived together	15-34 years	Ashanti	Urban	Richest	Improved source of drinking water	Unimproved
380	Female	15-34 years	No education/preschool	Never married/never lived together	15-34 years	Ashanti	Urban	Middle	Improved source of drinking water	Unimproved
381	Female	15-34 years	Middle/JSS/JHS	Never married/never lived together	15-34 years	Central	Rural	Middle	Improved source of drinking water	Unimproved
382	Female	15-34 years	No education/preschool	Never married/never lived together	15-34 years	Central	Rural	Poorer	Improved source of drinking water	Unimproved
383	Female	15-34 years	Middle/JSS/JHS	Never married/never lived together	15-34 years	Northern	Urban	Middle	Improved source of drinking water	Unimproved
384	Female	15-34 years	Middle/JSS/JHS	Never married/never lived together	15-34 years	Volta	Urban	Richer	Improved source of drinking water	Unimproved
385	Female	15-34 years	Middle/JSS/JHS	Never married/never lived together	15-34 years	Western	Urban	Richest	Improved source of drinking water	Unimproved
386	Female	15-34 years	Higher	Never married/never lived together	15-34 years	Greater Accra	Urban	Richest	Improved source of drinking water	Unimproved
387	Female	15-34 years	Higher	Never married/never lived together	15-34 years	Greater Accra	Urban	Richest	Improved source of drinking water	Improved
388	Female	15-34 years	Middle/JSS/JHS	Never married/never lived together	15-34 years	Greater Accra	Urban	Richer	Improved source of drinking water	Unimproved
389	Female	15-34 years	Higher	Never married/never lived together	15-34 years	Greater Accra	Urban	Richest	Improved source of drinking water	Improved
390	Female	15-34 years	Secondary/SSS/SHS	Never married/never lived together	15-34 years	Volta	Rural	Richer	Improved source of drinking water	Improved
391	Female	15-34 years	Middle/JSS/JHS	Never married/never lived together	15-34 years	Upper East	Urban	Middle	Improved source of drinking water	Unimproved
392	Female	15-34 years	Secondary/SSS/SHS	Never married/never lived together	15-34 years	Upper East	Urban	Richest	Improved source of drinking water	Unimproved
393	Female	15-34 years	Higher	Never married/never lived together	15-34 years	Central	Urban	Richer	Improved source of drinking water	Unimproved
394	Female	15-34 years	Secondary/SSS/SHS	Never married/never lived together	15-34 years	Central	Urban	Richer	Improved source of drinking water	Unimproved
395	Female	15-34 years	Secondary/SSS/SHS	Never married/never lived together	15-34 years	Central	Urban	Middle	Improved source of drinking water	Unimproved
396	Female	15-34 years	Middle/JSS/JHS	Never married/never lived together	15-34 years	Central	Urban	Richer	Improved source of drinking water	Unimproved
397	Female	15-34 years	Middle/JSS/JHS	Never married/never lived together	15-34 years	Volta	Rural	Middle	Improved source of drinking water	Unimproved
398	Female	15-34 years	Middle/JSS/JHS	Never married/never lived together	15-34 years	Volta	Rural	Middle	Improved source of drinking water	Unimproved
399	Female	15-34 years	Higher	Never married/never lived together	15-34 years	Greater Accra	Urban	Richest	Improved source of drinking water	Unimproved
400	Female	15-34 years	Secondary/SSS/SHS	Never married/never lived together	15-34 years	Volta	Rural	Middle	Improved source of drinking water	Unimproved
401	Female	15-34 years	Secondary/SSS/SHS	Never married/never lived together	15-34 years	Volta	Rural	Middle	Improved source of drinking water	Unimproved
402	Female	15-34 years	Higher	Never married/never lived together	15-34 years	Brong Ahafo	Urban	Richer	Improved source of drinking water	Unimproved
403	Female	15-34 years	Secondary/SSS/SHS	Never married/never lived together	15-34 years	Brong Ahafo	Urban	Richest	Improved source of drinking water	Unimproved
404	Female	15-34 years	Higher	Never married/never lived together	15-34 years	Brong Ahafo	Urban	Richer	Improved source of drinking water	Unimproved
405	Female	15-34 years	Secondary/SSS/SHS	Never married/never lived together	15-34 years	Brong Ahafo	Urban	Richest	Improved source of drinking water	Unimproved
406	Female	15-34 years	Higher	Never married/never lived together	15-34 years	Brong Ahafo	Urban	Richest	Improved source of drinking water	Unimproved
407	Female	15-34 years	Secondary/SSS/SHS	Never married/never lived together	15-34 years	Western	Urban	Richer	Improved source of drinking water	Unimproved
408	Female	15-34 years	Primary	Never married/never lived together	15-34 years	Western	Urban	Middle	Improved source of drinking water	Unimproved
409	Female	15-34 years	Primary	Never married/never lived together	15-34 years	Eastern	Rural	Poorer	Improved source of drinking water	Unimproved
410	Female	15-34 years	Middle/JSS/JHS	Never married/never lived together	15-34 years	Eastern	Rural	Richer	Improved source of drinking water	Unimproved
411	Female	15-34 years	Middle/JSS/JHS	Never married/never lived together	15-34 years	Volta	Urban	Middle	Unimproved source of drinking water	Unimproved
412	Female	15-34 years	Middle/JSS/JHS	Never married/never lived together	15-34 years	Volta	Urban	Middle	Improved source of drinking water	Unimproved
413	Female	15-34 years	Middle/JSS/JHS	Never married/never lived together	15-34 years	Greater Accra	Urban	Richer	Improved source of drinking water	Unimproved
414	Female	15-34 years	Primary	Never married/never lived together	15-34 years	Greater Accra	Urban	Middle	Improved source of drinking water	Unimproved
415	Female	15-34 years	Middle/JSS/JHS	Never married/never lived together	15-34 years	Volta	Rural	Middle	Improved source of drinking water	Unimproved
416	Female	15-34 years	Middle/JSS/JHS	Never married/never lived together	15-34 years	Greater Accra	Urban	Middle	Improved source of drinking water	Unimproved
417	Female	15-34 years	Middle/JSS/JHS	Never married/never lived together	15-34 years	Western	Rural	Richer	Improved source of drinking water	Unimproved
418	Female	15-34 years	Secondary/SSS/SHS	Never married/never lived together	15-34 years	Western	Rural	Middle	Improved source of drinking water	Unimproved
419	Female	15-34 years	Secondary/SSS/SHS	Never married/never lived together	15-34 years	Central	Urban	Richer	Improved source of drinking water	Unimproved
420	Female	15-34 years	Secondary/SSS/SHS	Never married/never lived together	15-34 years	Central	Urban	Richer	Improved source of drinking water	Unimproved
421	Female	15-34 years	Higher	Never married/never lived together	15-34 years	Eastern	Urban	Richest	Improved source of drinking water	Unimproved
422	Female	15-34 years	Secondary/SSS/SHS	Never married/never lived together	15-34 years	Eastern	Urban	Richer	Improved source of drinking water	Unimproved
423	Female	15-34 years	Secondary/SSS/SHS	Never married/never lived together	15-34 years	Eastern	Urban	Richest	Improved source of drinking water	Improved
424	Female	15-34 years	Higher	Never married/never lived together	15-34 years	Eastern	Urban	Richest	Improved source of drinking water	Improved
425	Female	15-34 years	Middle/JSS/JHS	Never married/never lived together	15-34 years	Greater Accra	Urban	Richer	Improved source of drinking water	Unimproved
426	Female	15-34 years	Higher	Never married/never lived together	15-34 years	Greater Accra	Urban	Richest	Improved source of drinking water	Unimproved
427	Female	15-34 years	Secondary/SSS/SHS	Never married/never lived together	15-34 years	Ashanti	Urban	Richer	Improved source of drinking water	Unimproved
428	Female	15-34 years	Secondary/SSS/SHS	Never married/never lived together	15-34 years	Ashanti	Urban	Richest	Improved source of drinking water	Unimproved
429	Female	15-34 years	Middle/JSS/JHS	Never married/never lived together	15-34 years	Ashanti	Urban	Richer	Improved source of drinking water	Unimproved
430	Female	15-34 years	Middle/JSS/JHS	Never married/never lived together	15-34 years	Northern	Urban	Poorer	Improved source of drinking water	Unimproved
431	Female	15-34 years	No education/preschool	Never married/never lived together	15-34 years	Northern	Urban	Middle	Improved source of drinking water	Unimproved
432	Female	15-34 years	Middle/JSS/JHS	Never married/never lived together	15-34 years	Greater Accra	Urban	Richer	Improved source of drinking water	Unimproved
433	Female	15-34 years	Middle/JSS/JHS	Never married/never lived together	15-34 years	Ashanti	Urban	Richest	Improved source of drinking water	Unimproved
434	Female	15-34 years	Middle/JSS/JHS	Never married/never lived together	15-34 years	Ashanti	Urban	Richer	Improved source of drinking water	Unimproved
435	Female	15-34 years	Higher	Never married/never lived together	15-34 years	Central	Rural	Richer	Improved source of drinking water	Unimproved
436	Female	15-34 years	Secondary/SSS/SHS	Never married/never lived together	15-34 years	Central	Rural	Middle	Improved source of drinking water	Unimproved
437	Female	15-34 years	Middle/JSS/JHS	Never married/never lived together	15-34 years	Central	Rural	Middle	Improved source of drinking water	Unimproved
438	Female	15-34 years	Higher	Never married/never lived together	15-34 years	Greater Accra	Urban	Richest	Improved source of drinking water	Improved
439	Female	15-34 years	Middle/JSS/JHS	Never married/never lived together	15-34 years	Greater Accra	Urban	Richest	Improved source of drinking water	Improved
440	Female	15-34 years	Higher	Never married/never lived together	15-34 years	Greater Accra	Urban	Richest	Improved source of drinking water	Unimproved
441	Female	15-34 years	Higher	Never married/never lived together	15-34 years	Upper East	Urban	Richer	Improved source of drinking water	Unimproved
442	Female	15-34 years	Middle/JSS/JHS	Never married/never lived together	15-34 years	Volta	Urban	Middle	Unimproved source of drinking water	Unimproved
443	Female	15-34 years	Primary	Never married/never lived together	15-34 years	Volta	Urban	Poorest	Improved source of drinking water	Unimproved
444	Female	15-34 years	Middle/JSS/JHS	Never married/never lived together	15-34 years	Ashanti	Rural	Middle	Improved source of drinking water	Unimproved
445	Female	15-34 years	Higher	Never married/never lived together	15-34 years	Ashanti	Rural	Richer	Improved source of drinking water	Unimproved
446	Female	15-34 years	Middle/JSS/JHS	Never married/never lived together	15-34 years	Western	Urban	Richer	Improved source of drinking water	Unimproved
447	Female	15-34 years	Secondary/SSS/SHS	Never married/never lived together	15-34 years	Western	Urban	Richer	Improved source of drinking water	Unimproved
448	Female	15-34 years	No education/preschool	Never married/never lived together	15-34 years	Western	Rural	Middle	Improved source of drinking water	Unimproved
449	Female	15-34 years	Middle/JSS/JHS	Never married/never lived together	15-34 years	Western	Rural	Poorer	Improved source of drinking water	Unimproved
450	Female	15-34 years	Middle/JSS/JHS	Never married/never lived together	15-34 years	Western	Rural	Middle	Improved source of drinking water	Unimproved
451	Female	15-34 years	Middle/JSS/JHS	Never married/never lived together	15-34 years	Western	Rural	Richer	Improved source of drinking water	Unimproved
452	Female	15-34 years	Middle/JSS/JHS	Never married/never lived together	15-34 years	Eastern	Rural	Middle	Improved source of drinking water	Unimproved
453	Female	15-34 years	Secondary/SSS/SHS	Never married/never lived together	15-34 years	Ashanti	Urban	Richer	Improved source of drinking water	Unimproved
454	Female	15-34 years	Middle/JSS/JHS	Never married/never lived together	15-34 years	Ashanti	Urban	Richest	Improved source of drinking water	Unimproved
455	Female	15-34 years	No education/preschool	Never married/never lived together	15-34 years	Ashanti	Urban	Richest	Improved source of drinking water	Unimproved
456	Female	15-34 years	Secondary/SSS/SHS	Never married/never lived together	15-34 years	Ashanti	Urban	Middle	Improved source of drinking water	Unimproved
457	Female	15-34 years	Higher	Never married/never lived together	15-34 years	Ashanti	Urban	Richest	Improved source of drinking water	Improved
458	Female	15-34 years	Middle/JSS/JHS	Never married/never lived together	15-34 years	Ashanti	Urban	Richest	Improved source of drinking water	Improved
459	Female	15-34 years	Primary	Never married/never lived together	15-34 years	Western	Rural	Poorer	Unimproved source of drinking water	Unimproved
460	Female	15-34 years	Higher	Never married/never lived together	15-34 years	Greater Accra	Urban	Richest	Improved source of drinking water	Improved
461	Female	15-34 years	Middle/JSS/JHS	Never married/never lived together	15-34 years	Western	Rural	Richer	Improved source of drinking water	Unimproved
462	Female	15-34 years	Middle/JSS/JHS	Never married/never lived together	15-34 years	Ashanti	Urban	Richer	Improved source of drinking water	Unimproved
463	Female	15-34 years	Middle/JSS/JHS	Never married/never lived together	15-34 years	Ashanti	Rural	Richer	Improved source of drinking water	Unimproved
464	Female	15-34 years	Secondary/SSS/SHS	Never married/never lived together	15-34 years	Ashanti	Rural	Middle	Improved source of drinking water	Unimproved
465	Female	15-34 years	Middle/JSS/JHS	Never married/never lived together	15-34 years	Central	Urban	Richer	Improved source of drinking water	Unimproved
466	Female	15-34 years	Secondary/SSS/SHS	Never married/never lived together	15-34 years	Central	Urban	Middle	Improved source of drinking water	Unimproved
467	Female	15-34 years	Middle/JSS/JHS	Never married/never lived together	15-34 years	Central	Urban	Poorer	Improved source of drinking water	Unimproved
468	Female	15-34 years	Secondary/SSS/SHS	Never married/never lived together	15-34 years	Central	Urban	Richer	Improved source of drinking water	Unimproved
469	Female	15-34 years	Middle/JSS/JHS	Never married/never lived together	15-34 years	Central	Urban	Richest	Improved source of drinking water	Unimproved
470	Female	15-34 years	Higher	Never married/never lived together	15-34 years	Brong Ahafo	Urban	Richest	Improved source of drinking water	Unimproved
471	Female	15-34 years	Middle/JSS/JHS	Never married/never lived together	15-34 years	Brong Ahafo	Urban	Richer	Improved source of drinking water	Unimproved
472	Female	15-34 years	Primary	Never married/never lived together	15-34 years	Brong Ahafo	Urban	Richer	Improved source of drinking water	Unimproved
473	Female	15-34 years	Higher	Never married/never lived together	15-34 years	Brong Ahafo	Urban	Richer	Improved source of drinking water	Unimproved
474	Female	15-34 years	Primary	Never married/never lived together	15-34 years	Brong Ahafo	Urban	Richest	Improved source of drinking water	Unimproved
475	Female	15-34 years	Higher	Never married/never lived together	15-34 years	Upper West	Urban	Richer	Improved source of drinking water	Unimproved
476	Female	15-34 years	Secondary/SSS/SHS	Never married/never lived together	15-34 years	Western	Urban	Richer	Improved source of drinking water	Unimproved
477	Female	15-34 years	Secondary/SSS/SHS	Never married/never lived together	15-34 years	Greater Accra	Urban	Richer	Improved source of drinking water	Unimproved
478	Female	15-34 years	Primary	Never married/never lived together	15-34 years	Volta	Rural	Middle	Improved source of drinking water	Unimproved
479	Female	15-34 years	Middle/JSS/JHS	Never married/never lived together	15-34 years	Brong Ahafo	Urban	Middle	Unimproved source of drinking water	Unimproved
480	Female	15-34 years	Middle/JSS/JHS	Never married/never lived together	15-34 years	Upper East	Urban	Richest	Improved source of drinking water	Unimproved
481	Female	15-34 years	Higher	Never married/never lived together	15-34 years	Upper East	Urban	Richer	Improved source of drinking water	Unimproved
482	Female	15-34 years	Higher	Never married/never lived together	15-34 years	Upper East	Urban	Middle	Improved source of drinking water	Unimproved
483	Female	15-34 years	Secondary/SSS/SHS	Never married/never lived together	15-34 years	Greater Accra	Urban	Richest	Improved source of drinking water	Unimproved
484	Female	15-34 years	Primary	Never married/never lived together	15-34 years	Ashanti	Urban	Richest	Improved source of drinking water	Unimproved
485	Female	15-34 years	Secondary/SSS/SHS	Never married/never lived together	15-34 years	Ashanti	Urban	Richest	Improved source of drinking water	Unimproved
486	Female	15-34 years	Middle/JSS/JHS	Never married/never lived together	15-34 years	Volta	Rural	Middle	Improved source of drinking water	Unimproved
487	Female	15-34 years	Middle/JSS/JHS	Never married/never lived together	15-34 years	Volta	Rural	Richer	Improved source of drinking water	Unimproved
488	Female	15-34 years	Secondary/SSS/SHS	Never married/never lived together	15-34 years	Volta	Rural	Middle	Improved source of drinking water	Unimproved
489	Female	15-34 years	Primary	Never married/never lived together	15-34 years	Volta	Rural	Middle	Improved source of drinking water	Unimproved
490	Female	15-34 years	Secondary/SSS/SHS	Never married/never lived together	15-34 years	Volta	Rural	Middle	Improved source of drinking water	Improved
491	Female	15-34 years	Secondary/SSS/SHS	Never married/never lived together	15-34 years	Volta	Urban	Richest	Improved source of drinking water	Improved
492	Female	15-34 years	Higher	Never married/never lived together	15-34 years	Volta	Urban	Richer	Improved source of drinking water	Unimproved
493	Female	15-34 years	No education/preschool	Never married/never lived together	15-34 years	Eastern	Urban	Richest	Improved source of drinking water	Unimproved
494	Female	15-34 years	Middle/JSS/JHS	Never married/never lived together	15-34 years	Volta	Urban	Middle	Improved source of drinking water	Unimproved
495	Female	15-34 years	Higher	Never married/never lived together	15-34 years	Northern	Urban	Richest	Improved source of drinking water	Improved
496	Female	15-34 years	Middle/JSS/JHS	Never married/never lived together	15-34 years	Brong Ahafo	Urban	Poorer	Unimproved source of drinking water	Unimproved
497	Female	15-34 years	Higher	Never married/never lived together	15-34 years	Western	Rural	Richer	Improved source of drinking water	Unimproved
498	Female	15-34 years	Middle/JSS/JHS	Never married/never lived together	15-34 years	Western	Rural	Middle	Improved source of drinking water	Unimproved
499	Female	15-34 years	Primary	Never married/never lived together	15-34 years	Western	Rural	Poorer	Improved source of drinking water	Unimproved
500	Female	15-34 years	Secondary/SSS/SHS	Never married/never lived together	15-34 years	Western	Rural	Poorer	Improved source of drinking water	Unimproved
501	Female	15-34 years	Middle/JSS/JHS	Never married/never lived together	15-34 years	Western	Rural	Poorer	Improved source of drinking water	Unimproved
502	Female	15-34 years	Secondary/SSS/SHS	Never married/never lived together	15-34 years	Eastern	Rural	Richer	Improved source of drinking water	Unimproved
503	Female	15-34 years	Middle/JSS/JHS	Never married/never lived together	15-34 years	Volta	Rural	Poorer	Improved source of drinking water	Unimproved
504	Female	15-34 years	Higher	Never married/never lived together	15-34 years	Volta	Rural	Richer	Improved source of drinking water	Unimproved
505	Female	15-34 years	Higher	Never married/never lived together	15-34 years	Volta	Rural	Richer	Improved source of drinking water	Unimproved
506	Female	15-34 years	Secondary/SSS/SHS	Never married/never lived together	15-34 years	Ashanti	Urban	Richest	Improved source of drinking water	Unimproved
507	Female	15-34 years	Higher	Never married/never lived together	15-34 years	Ashanti	Urban	Richest	Improved source of drinking water	Unimproved
508	Female	15-34 years	Middle/JSS/JHS	Never married/never lived together	15-34 years	Ashanti	Urban	Middle	Improved source of drinking water	Unimproved
509	Female	15-34 years	Higher	Never married/never lived together	15-34 years	Ashanti	Urban	Richer	Improved source of drinking water	Unimproved
510	Male	15-34 years	Secondary/SSS/SHS	Never married/never lived together	15-34 years	Western	Rural	Middle	Improved source of drinking water	Unimproved
511	Male	15-34 years	Middle/JSS/JHS	Never married/never lived together	15-34 years	Eastern	Rural	Middle	Improved source of drinking water	Unimproved
512	Male	15-34 years	Secondary/SSS/SHS	Never married/never lived together	15-34 years	Ashanti	Urban	Richest	Improved source of drinking water	Unimproved
513	Male	15-34 years	Middle/JSS/JHS	Never married/never lived together	15-34 years	Ashanti	Urban	Richer	Improved source of drinking water	Unimproved
514	Male	15-34 years	Secondary/SSS/SHS	Never married/never lived together	15-34 years	Ashanti	Urban	Richer	Improved source of drinking water	Improved
515	Male	15-34 years	Higher	Never married/never lived together	15-34 years	Ashanti	Urban	Richest	Improved source of drinking water	Unimproved
516	Male	15-34 years	Middle/JSS/JHS	Never married/never lived together	15-34 years	Ashanti	Urban	Richest	Improved source of drinking water	Unimproved
517	Male	15-34 years	Middle/JSS/JHS	Never married/never lived together	15-34 years	Central	Urban	Richer	Improved source of drinking water	Unimproved
518	Male	15-34 years	No education/preschool	Never married/never lived together	15-34 years	Central	Urban	Richer	Improved source of drinking water	Unimproved
519	Male	15-34 years	Middle/JSS/JHS	Never married/never lived together	15-34 years	Northern	Rural	Poorest	Improved source of drinking water	Unimproved
520	Male	15-34 years	Secondary/SSS/SHS	Never married/never lived together	15-34 years	Ashanti	Urban	Richer	Improved source of drinking water	Unimproved
521	Male	15-34 years	Secondary/SSS/SHS	Never married/never lived together	15-34 years	Ashanti	Urban	Richer	Improved source of drinking water	Unimproved
522	Male	15-34 years	Secondary/SSS/SHS	Never married/never lived together	15-34 years	Ashanti	Urban	Middle	Improved source of drinking water	Unimproved
523	Male	15-34 years	Secondary/SSS/SHS	Never married/never lived together	15-34 years	Ashanti	Urban	Richer	Improved source of drinking water	Unimproved
524	Male	15-34 years	Middle/JSS/JHS	Never married/never lived together	15-34 years	Ashanti	Urban	Richest	Improved source of drinking water	Unimproved
525	Male	15-34 years	Middle/JSS/JHS	Never married/never lived together	15-34 years	Ashanti	Urban	Richer	Improved source of drinking water	Unimproved
526	Male	15-34 years	Secondary/SSS/SHS	Never married/never lived together	15-34 years	Central	Rural	Richest	Improved source of drinking water	Unimproved
527	Male	15-34 years	Secondary/SSS/SHS	Never married/never lived together	15-34 years	Central	Rural	Middle	Improved source of drinking water	Unimproved
528	Male	15-34 years	Middle/JSS/JHS	Never married/never lived together	15-34 years	Central	Rural	Middle	Improved source of drinking water	Unimproved
529	Male	15-34 years	Middle/JSS/JHS	Never married/never lived together	15-34 years	Ashanti	Urban	Richer	Improved source of drinking water	Unimproved
530	Male	15-34 years	Higher	Never married/never lived together	15-34 years	Ashanti	Urban	Richest	Improved source of drinking water	Unimproved
531	Male	15-34 years	Middle/JSS/JHS	Never married/never lived together	15-34 years	Ashanti	Urban	Richest	Improved source of drinking water	Unimproved
532	Male	15-34 years	Secondary/SSS/SHS	Never married/never lived together	15-34 years	Central	Urban	Middle	Improved source of drinking water	Unimproved
533	Male	15-34 years	Secondary/SSS/SHS	Never married/never lived together	15-34 years	Central	Urban	Richest	Improved source of drinking water	Unimproved
534	Male	15-34 years	Secondary/SSS/SHS	Never married/never lived together	15-34 years	Central	Urban	Richer	Improved source of drinking water	Unimproved
535	Male	15-34 years	Secondary/SSS/SHS	Never married/never lived together	15-34 years	Central	Urban	Richer	Improved source of drinking water	Unimproved
536	Male	15-34 years	Middle/JSS/JHS	Never married/never lived together	15-34 years	Volta	Rural	Poorer	Unimproved source of drinking water	Unimproved
537	Male	15-34 years	Middle/JSS/JHS	Never married/never lived together	15-34 years	Brong Ahafo	Rural	Poorest	Improved source of drinking water	Unimproved
538	Male	15-34 years	Higher	Never married/never lived together	15-34 years	Brong Ahafo	Urban	Richest	Improved source of drinking water	Unimproved
539	Male	15-34 years	Secondary/SSS/SHS	Never married/never lived together	15-34 years	Brong Ahafo	Urban	Middle	Improved source of drinking water	Unimproved
540	Male	15-34 years	Middle/JSS/JHS	Never married/never lived together	15-34 years	Brong Ahafo	Urban	Middle	Improved source of drinking water	Unimproved
541	Male	15-34 years	Middle/JSS/JHS	Never married/never lived together	15-34 years	Brong Ahafo	Urban	Poorer	Improved source of drinking water	Improved
542	Male	15-34 years	Middle/JSS/JHS	Never married/never lived together	15-34 years	Brong Ahafo	Urban	Poorer	Improved source of drinking water	Unimproved
543	Male	15-34 years	Higher	Never married/never lived together	15-34 years	Northern	Urban	Richest	Improved source of drinking water	Unimproved
544	Male	15-34 years	Higher	Never married/never lived together	15-34 years	Northern	Urban	Middle	Improved source of drinking water	Unimproved
545	Male	15-34 years	Secondary/SSS/SHS	Never married/never lived together	15-34 years	Northern	Urban	Middle	Improved source of drinking water	Unimproved
546	Male	15-34 years	Higher	Never married/never lived together	15-34 years	Brong Ahafo	Rural	Richer	Improved source of drinking water	Unimproved
547	Male	15-34 years	Middle/JSS/JHS	Never married/never lived together	15-34 years	Brong Ahafo	Rural	Poorer	Improved source of drinking water	Unimproved
548	Male	15-34 years	Primary	Never married/never lived together	15-34 years	Eastern	Rural	Poorer	Unimproved source of drinking water	Unimproved
549	Male	15-34 years	Primary	Never married/never lived together	15-34 years	Brong Ahafo	Urban	Middle	Improved source of drinking water	Unimproved
550	Male	15-34 years	Secondary/SSS/SHS	Never married/never lived together	15-34 years	Brong Ahafo	Urban	Middle	Improved source of drinking water	Unimproved
551	Male	15-34 years	Primary	Never married/never lived together	15-34 years	Brong Ahafo	Urban	Richer	Improved source of drinking water	Unimproved
552	Male	15-34 years	Secondary/SSS/SHS	Never married/never lived together	15-34 years	Brong Ahafo	Urban	Richer	Improved source of drinking water	Unimproved
553	Male	15-34 years	No education/preschool	Never married/never lived together	15-34 years	Brong Ahafo	Urban	Richer	Improved source of drinking water	Unimproved
554	Male	15-34 years	Higher	Never married/never lived together	15-34 years	Volta	Rural	Middle	Improved source of drinking water	Unimproved
555	Male	15-34 years	Higher	Never married/never lived together	15-34 years	Volta	Rural	Middle	Improved source of drinking water	Unimproved
556	Male	15-34 years	Middle/JSS/JHS	Never married/never lived together	15-34 years	Volta	Rural	Poorer	Improved source of drinking water	Unimproved
557	Male	15-34 years	Primary	Never married/never lived together	15-34 years	Ashanti	Rural	Poorer	Unimproved source of drinking water	Unimproved
558	Male	15-34 years	Higher	Never married/never lived together	15-34 years	Upper East	Rural	Poorest	Improved source of drinking water	Unimproved
559	Male	15-34 years	Primary	Never married/never lived together	15-34 years	Upper East	Rural	Poorest	Improved source of drinking water	Unimproved
560	Male	15-34 years	Middle/JSS/JHS	Never married/never lived together	15-34 years	Brong Ahafo	Urban	Richer	Improved source of drinking water	Unimproved
561	Male	15-34 years	Secondary/SSS/SHS	Never married/never lived together	15-34 years	Brong Ahafo	Urban	Richest	Improved source of drinking water	Unimproved
562	Male	15-34 years	Middle/JSS/JHS	Never married/never lived together	15-34 years	Brong Ahafo	Urban	Richest	Improved source of drinking water	Unimproved
563	Male	15-34 years	Secondary/SSS/SHS	Never married/never lived together	15-34 years	Brong Ahafo	Urban	Richer	Improved source of drinking water	Unimproved
564	Male	15-34 years	Middle/JSS/JHS	Never married/never lived together	15-34 years	Upper East	Rural	Poorest	Improved source of drinking water	Unimproved
565	Male	15-34 years	Primary	Never married/never lived together	15-34 years	Upper East	Rural	Poorest	Unimproved source of drinking water	Unimproved
566	Male	15-34 years	Middle/JSS/JHS	Never married/never lived together	15-34 years	Central	Urban	Richer	Improved source of drinking water	Unimproved
567	Male	15-34 years	No education/preschool	Never married/never lived together	15-34 years	Eastern	Rural	Poorer	Unimproved source of drinking water	Unimproved
568	Male	15-34 years	Middle/JSS/JHS	Never married/never lived together	15-34 years	Eastern	Rural	Poorer	Unimproved source of drinking water	Unimproved
569	Male	15-34 years	Middle/JSS/JHS	Never married/never lived together	15-34 years	Eastern	Rural	Middle	Improved source of drinking water	Unimproved
570	Male	15-34 years	Middle/JSS/JHS	Never married/never lived together	15-34 years	Northern	Rural	Poorest	Unimproved source of drinking water	Unimproved
571	Male	15-34 years	No education/preschool	Never married/never lived together	15-34 years	Northern	Rural	Poorest	Unimproved source of drinking water	Unimproved
572	Male	15-34 years	Secondary/SSS/SHS	Never married/never lived together	15-34 years	Northern	Rural	Poorest	Unimproved source of drinking water	Unimproved
573	Male	15-34 years	Primary	Never married/never lived together	15-34 years	Northern	Rural	Poorest	Unimproved source of drinking water	Unimproved
574	Male	15-34 years	Higher	Never married/never lived together	15-34 years	Greater Accra	Rural	Richer	Improved source of drinking water	Unimproved
575	Male	15-34 years	Secondary/SSS/SHS	Never married/never lived together	15-34 years	Greater Accra	Rural	Richer	Improved source of drinking water	Unimproved
576	Male	15-34 years	Secondary/SSS/SHS	Never married/never lived together	15-34 years	Greater Accra	Rural	Richer	Improved source of drinking water	Unimproved
577	Male	15-34 years	Middle/JSS/JHS	Never married/never lived together	15-34 years	Ashanti	Urban	Richer	Improved source of drinking water	Unimproved
578	Male	15-34 years	Higher	Never married/never lived together	15-34 years	Ashanti	Urban	Richest	Improved source of drinking water	Unimproved
579	Male	15-34 years	Primary	Never married/never lived together	15-34 years	Brong Ahafo	Rural	Middle	Improved source of drinking water	Unimproved
580	Male	15-34 years	Middle/JSS/JHS	Never married/never lived together	15-34 years	Volta	Rural	Poorest	Unimproved source of drinking water	Unimproved
581	Male	15-34 years	Middle/JSS/JHS	Never married/never lived together	15-34 years	Volta	Rural	Poorer	Unimproved source of drinking water	Unimproved
582	Male	15-34 years	Middle/JSS/JHS	Never married/never lived together	15-34 years	Eastern	Rural	Poorer	Unimproved source of drinking water	Unimproved
583	Male	15-34 years	No education/preschool	Never married/never lived together	15-34 years	Eastern	Rural	Poorest	Unimproved source of drinking water	Unimproved
584	Male	15-34 years	Secondary/SSS/SHS	Never married/never lived together	15-34 years	Greater Accra	Urban	Richest	Improved source of drinking water	Unimproved
585	Male	15-34 years	Secondary/SSS/SHS	Never married/never lived together	15-34 years	Greater Accra	Urban	Middle	Improved source of drinking water	Unimproved
586	Male	15-34 years	Middle/JSS/JHS	Never married/never lived together	15-34 years	Central	Urban	Middle	Improved source of drinking water	Unimproved
587	Male	15-34 years	Middle/JSS/JHS	Never married/never lived together	15-34 years	Central	Urban	Middle	Improved source of drinking water	Unimproved
588	Male	15-34 years	No education/preschool	Never married/never lived together	15-34 years	Central	Rural	Middle	Unimproved source of drinking water	Unimproved
589	Male	15-34 years	Secondary/SSS/SHS	Never married/never lived together	15-34 years	Western	Urban	Richest	Improved source of drinking water	Unimproved
590	Male	15-34 years	Secondary/SSS/SHS	Never married/never lived together	15-34 years	Western	Urban	Richest	Improved source of drinking water	Unimproved
591	Male	15-34 years	Middle/JSS/JHS	Never married/never lived together	15-34 years	Western	Urban	Richest	Improved source of drinking water	Unimproved
592	Male	15-34 years	Higher	Never married/never lived together	15-34 years	Western	Urban	Richest	Improved source of drinking water	Unimproved
593	Male	15-34 years	Middle/JSS/JHS	Never married/never lived together	15-34 years	Northern	Urban	Middle	Improved source of drinking water	Unimproved
594	Male	15-34 years	Higher	Never married/never lived together	15-34 years	Northern	Urban	Middle	Improved source of drinking water	Unimproved
595	Male	15-34 years	Middle/JSS/JHS	Never married/never lived together	15-34 years	Volta	Urban	Richest	Improved source of drinking water	Unimproved
596	Male	15-34 years	Higher	Never married/never lived together	15-34 years	Volta	Urban	Richer	Improved source of drinking water	Improved
597	Male	15-34 years	Higher	Never married/never lived together	15-34 years	Central	Rural	Richer	Improved source of drinking water	Unimproved
598	Male	15-34 years	Secondary/SSS/SHS	Never married/never lived together	15-34 years	Eastern	Urban	Middle	Improved source of drinking water	Unimproved
599	Male	15-34 years	Secondary/SSS/SHS	Never married/never lived together	15-34 years	Eastern	Urban	Richest	Improved source of drinking water	Unimproved
600	Male	15-34 years	Primary	Never married/never lived together	15-34 years	Eastern	Urban	Middle	Improved source of drinking water	Unimproved
601	Male	15-34 years	Middle/JSS/JHS	Never married/never lived together	15-34 years	Volta	Urban	Richest	Improved source of drinking water	Unimproved
602	Male	15-34 years	Middle/JSS/JHS	Never married/never lived together	15-34 years	Volta	Urban	Poorest	Improved source of drinking water	Unimproved
603	Male	15-34 years	Higher	Never married/never lived together	15-34 years	Volta	Urban	Richest	Improved source of drinking water	Unimproved
604	Male	15-34 years	Primary	Never married/never lived together	15-34 years	Volta	Urban	Richer	Improved source of drinking water	Unimproved
605	Male	15-34 years	Higher	Never married/never lived together	15-34 years	Upper East	Rural	Middle	Improved source of drinking water	Unimproved
606	Male	15-34 years	Higher	Never married/never lived together	15-34 years	Upper East	Rural	Middle	Improved source of drinking water	Unimproved
607	Male	15-34 years	Secondary/SSS/SHS	Never married/never lived together	15-34 years	Brong Ahafo	Rural	Middle	Unimproved source of drinking water	Unimproved
608	Male	15-34 years	Middle/JSS/JHS	Never married/never lived together	15-34 years	Brong Ahafo	Rural	Middle	Improved source of drinking water	Unimproved
609	Male	15-34 years	Secondary/SSS/SHS	Never married/never lived together	15-34 years	Greater Accra	Urban	Richest	Improved source of drinking water	Unimproved
610	Male	15-34 years	Secondary/SSS/SHS	Never married/never lived together	15-34 years	Greater Accra	Urban	Richest	Improved source of drinking water	Unimproved
611	Male	15-34 years	Primary	Never married/never lived together	15-34 years	Upper West	Rural	Poorest	Improved source of drinking water	Unimproved
612	Male	15-34 years	Middle/JSS/JHS	Never married/never lived together	15-34 years	Upper West	Rural	Poorer	Improved source of drinking water	Unimproved
613	Male	15-34 years	No education/preschool	Never married/never lived together	15-34 years	Brong Ahafo	Rural	Poorer	Improved source of drinking water	Unimproved
614	Male	15-34 years	Middle/JSS/JHS	Never married/never lived together	15-34 years	Brong Ahafo	Rural	Poorer	Improved source of drinking water	Unimproved
615	Male	15-34 years	Higher	Never married/never lived together	15-34 years	Central	Rural	Richest	Improved source of drinking water	Unimproved
616	Male	15-34 years	Secondary/SSS/SHS	Never married/never lived together	15-34 years	Central	Rural	Middle	Improved source of drinking water	Unimproved
617	Male	15-34 years	Secondary/SSS/SHS	Never married/never lived together	15-34 years	Central	Rural	Richer	Improved source of drinking water	Unimproved
618	Male	15-34 years	Secondary/SSS/SHS	Never married/never lived together	15-34 years	Western	Urban	Richest	Improved source of drinking water	Unimproved
619	Male	15-34 years	Middle/JSS/JHS	Never married/never lived together	15-34 years	Western	Urban	Richer	Improved source of drinking water	Unimproved
620	Male	15-34 years	Middle/JSS/JHS	Never married/never lived together	15-34 years	Western	Urban	Richest	Improved source of drinking water	Unimproved
621	Male	15-34 years	Secondary/SSS/SHS	Never married/never lived together	15-34 years	Western	Urban	Richest	Improved source of drinking water	Unimproved
622	Male	15-34 years	Secondary/SSS/SHS	Never married/never lived together	15-34 years	Western	Urban	Middle	Improved source of drinking water	Unimproved
623	Male	15-34 years	Secondary/SSS/SHS	Never married/never lived together	15-34 years	Western	Urban	Richer	Improved source of drinking water	Unimproved
624	Male	15-34 years	Secondary/SSS/SHS	Never married/never lived together	15-34 years	Western	Urban	Richer	Improved source of drinking water	Unimproved
625	Male	15-34 years	Secondary/SSS/SHS	Never married/never lived together	15-34 years	Western	Urban	Richest	Improved source of drinking water	Unimproved
626	Male	15-34 years	Secondary/SSS/SHS	Never married/never lived together	15-34 years	Western	Rural	Middle	Improved source of drinking water	Unimproved
627	Male	15-34 years	Secondary/SSS/SHS	Never married/never lived together	15-34 years	Western	Rural	Middle	Improved source of drinking water	Unimproved
628	Male	15-34 years	Secondary/SSS/SHS	Never married/never lived together	15-34 years	Western	Rural	Middle	Improved source of drinking water	Unimproved
629	Male	15-34 years	Middle/JSS/JHS	Never married/never lived together	15-34 years	Western	Rural	Middle	Improved source of drinking water	Unimproved
630	Male	15-34 years	Middle/JSS/JHS	Never married/never lived together	15-34 years	Volta	Rural	Poorer	Improved source of drinking water	Unimproved
631	Male	15-34 years	Middle/JSS/JHS	Never married/never lived together	15-34 years	Central	Rural	Poorer	Improved source of drinking water	Unimproved
632	Male	15-34 years	Higher	Never married/never lived together	15-34 years	Central	Rural	Middle	Improved source of drinking water	Unimproved
633	Male	15-34 years	Primary	Never married/never lived together	15-34 years	Eastern	Rural	Poorer	Unimproved source of drinking water	Unimproved
634	Male	15-34 years	Secondary/SSS/SHS	Never married/never lived together	15-34 years	Upper West	Urban	Poorest	Improved source of drinking water	Unimproved
635	Male	15-34 years	Middle/JSS/JHS	Never married/never lived together	15-34 years	Upper West	Urban	Poorer	Improved source of drinking water	Unimproved
636	Male	15-34 years	Higher	Never married/never lived together	15-34 years	Upper West	Urban	Poorest	Improved source of drinking water	Unimproved
637	Male	15-34 years	Higher	Never married/never lived together	15-34 years	Upper West	Urban	Richer	Improved source of drinking water	Unimproved
638	Male	15-34 years	Higher	Never married/never lived together	15-34 years	Upper West	Urban	Richer	Improved source of drinking water	Improved
639	Male	15-34 years	Secondary/SSS/SHS	Never married/never lived together	15-34 years	Brong Ahafo	Rural	Poorer	Improved source of drinking water	Unimproved
640	Male	15-34 years	Middle/JSS/JHS	Never married/never lived together	15-34 years	Brong Ahafo	Rural	Poorer	Improved source of drinking water	Unimproved
641	Male	15-34 years	Middle/JSS/JHS	Never married/never lived together	15-34 years	Ashanti	Urban	Richer	Improved source of drinking water	Unimproved
642	Male	15-34 years	Middle/JSS/JHS	Never married/never lived together	15-34 years	Upper West	Rural	Poorest	Improved source of drinking water	Unimproved
643	Male	15-34 years	No education/preschool	Never married/never lived together	15-34 years	Upper West	Rural	Poorest	Improved source of drinking water	Unimproved
644	Male	15-34 years	Middle/JSS/JHS	Never married/never lived together	15-34 years	Northern	Rural	Poorer	Improved source of drinking water	Unimproved
645	Male	15-34 years	Middle/JSS/JHS	Never married/never lived together	15-34 years	Northern	Rural	Poorer	Improved source of drinking water	Unimproved
646	Male	15-34 years	Higher	Never married/never lived together	15-34 years	Northern	Rural	Middle	Improved source of drinking water	Unimproved
647	Male	15-34 years	Middle/JSS/JHS	Never married/never lived together	15-34 years	Western	Rural	Richer	Improved source of drinking water	Unimproved
648	Male	15-34 years	Middle/JSS/JHS	Never married/never lived together	15-34 years	Western	Rural	Middle	Improved source of drinking water	Unimproved
649	Male	15-34 years	Middle/JSS/JHS	Never married/never lived together	15-34 years	Western	Rural	Middle	Improved source of drinking water	Unimproved
650	Male	15-34 years	Higher	Never married/never lived together	15-34 years	Upper East	Urban	Richer	Unimproved source of drinking water	Unimproved
651	Male	15-34 years	Secondary/SSS/SHS	Never married/never lived together	15-34 years	Upper East	Urban	Richest	Improved source of drinking water	Unimproved
652	Male	15-34 years	Secondary/SSS/SHS	Never married/never lived together	15-34 years	Upper East	Urban	Richer	Improved source of drinking water	Unimproved
653	Male	15-34 years	Secondary/SSS/SHS	Never married/never lived together	15-34 years	Upper East	Urban	Middle	Improved source of drinking water	Unimproved
654	Male	15-34 years	Middle/JSS/JHS	Never married/never lived together	15-34 years	Brong Ahafo	Urban	Poorer	Improved source of drinking water	Unimproved
655	Male	15-34 years	Middle/JSS/JHS	Never married/never lived together	15-34 years	Brong Ahafo	Urban	Middle	Improved source of drinking water	Unimproved
656	Male	15-34 years	Middle/JSS/JHS	Never married/never lived together	15-34 years	Western	Urban	Richer	Improved source of drinking water	Unimproved
657	Male	15-34 years	Middle/JSS/JHS	Never married/never lived together	15-34 years	Western	Urban	Richest	Improved source of drinking water	Unimproved
658	Male	15-34 years	Primary	Never married/never lived together	15-34 years	Western	Urban	Middle	Improved source of drinking water	Unimproved
659	Male	15-34 years	Middle/JSS/JHS	Never married/never lived together	15-34 years	Eastern	Rural	Middle	Improved source of drinking water	Unimproved
660	Male	15-34 years	Middle/JSS/JHS	Never married/never lived together	15-34 years	Eastern	Rural	Middle	Improved source of drinking water	Improved
661	Male	15-34 years	Secondary/SSS/SHS	Never married/never lived together	15-34 years	Ashanti	Urban	Richest	Improved source of drinking water	Improved
662	Male	15-34 years	Middle/JSS/JHS	Never married/never lived together	15-34 years	Ashanti	Urban	Richest	Improved source of drinking water	Unimproved
663	Male	15-34 years	Higher	Never married/never lived together	15-34 years	Ashanti	Urban	Richest	Improved source of drinking water	Unimproved
664	Male	15-34 years	Higher	Never married/never lived together	15-34 years	Ashanti	Urban	Richest	Improved source of drinking water	Unimproved
665	Male	15-34 years	Secondary/SSS/SHS	Never married/never lived together	15-34 years	Ashanti	Urban	Richest	Improved source of drinking water	Improved
666	Male	15-34 years	Middle/JSS/JHS	Never married/never lived together	15-34 years	Northern	Rural	Poorer	Unimproved source of drinking water	Unimproved
667	Male	15-34 years	Higher	Never married/never lived together	15-34 years	Northern	Rural	Middle	Improved source of drinking water	Unimproved
668	Male	15-34 years	Middle/JSS/JHS	Never married/never lived together	15-34 years	Northern	Rural	Poorer	Improved source of drinking water	Unimproved
669	Male	15-34 years	Higher	Never married/never lived together	15-34 years	Northern	Rural	Poorer	Improved source of drinking water	Unimproved
670	Male	15-34 years	Higher	Never married/never lived together	15-34 years	Ashanti	Rural	Richer	Improved source of drinking water	Unimproved
671	Male	15-34 years	Higher	Never married/never lived together	15-34 years	Ashanti	Rural	Richer	Improved source of drinking water	Unimproved
672	Male	15-34 years	Primary	Never married/never lived together	15-34 years	Ashanti	Rural	Poorer	Improved source of drinking water	Unimproved
673	Male	15-34 years	Middle/JSS/JHS	Never married/never lived together	15-34 years	Ashanti	Rural	Middle	Improved source of drinking water	Unimproved
674	Male	15-34 years	Primary	Never married/never lived together	15-34 years	Ashanti	Rural	Poorer	Improved source of drinking water	Unimproved
675	Male	15-34 years	Primary	Never married/never lived together	15-34 years	Western	Rural	Middle	Unimproved source of drinking water	Unimproved
676	Male	15-34 years	Middle/JSS/JHS	Never married/never lived together	15-34 years	Western	Rural	Middle	Unimproved source of drinking water	Unimproved
677	Male	15-34 years	Middle/JSS/JHS	Never married/never lived together	15-34 years	Western	Rural	Middle	Unimproved source of drinking water	Unimproved
678	Male	15-34 years	Secondary/SSS/SHS	Never married/never lived together	15-34 years	Upper West	Urban	Richer	Improved source of drinking water	Unimproved
679	Male	15-34 years	Secondary/SSS/SHS	Never married/never lived together	15-34 years	Upper West	Urban	Richest	Improved source of drinking water	Unimproved
680	Male	15-34 years	Primary	Never married/never lived together	15-34 years	Upper West	Urban	Richer	Improved source of drinking water	Unimproved
681	Male	15-34 years	Higher	Never married/never lived together	15-34 years	Upper West	Urban	Richer	Improved source of drinking water	Unimproved
682	Male	15-34 years	Higher	Never married/never lived together	15-34 years	Northern	Urban	Richer	Improved source of drinking water	Unimproved
683	Male	15-34 years	Secondary/SSS/SHS	Never married/never lived together	15-34 years	Northern	Urban	Middle	Improved source of drinking water	Unimproved
684	Male	15-34 years	Secondary/SSS/SHS	Never married/never lived together	15-34 years	Northern	Urban	Middle	Unimproved source of drinking water	Unimproved
685	Male	15-34 years	Secondary/SSS/SHS	Never married/never lived together	15-34 years	Northern	Urban	Richest	Improved source of drinking water	Unimproved
686	Male	15-34 years	Secondary/SSS/SHS	Never married/never lived together	15-34 years	Northern	Urban	Middle	Unimproved source of drinking water	Unimproved
687	Male	15-34 years	Higher	Never married/never lived together	15-34 years	Northern	Urban	Richer	Improved source of drinking water	Unimproved
688	Male	15-34 years	Secondary/SSS/SHS	Never married/never lived together	15-34 years	Northern	Urban	Richest	Improved source of drinking water	Unimproved
689	Male	15-34 years	Higher	Never married/never lived together	15-34 years	Northern	Urban	Richer	Improved source of drinking water	Unimproved
690	Male	15-34 years	Primary	Never married/never lived together	15-34 years	Northern	Urban	Poorer	Improved source of drinking water	Unimproved
691	Male	15-34 years	Higher	Never married/never lived together	15-34 years	Northern	Urban	Richer	Improved source of drinking water	Unimproved
692	Male	15-34 years	Middle/JSS/JHS	Never married/never lived together	15-34 years	Eastern	Urban	Richer	Improved source of drinking water	Unimproved
693	Male	15-34 years	Middle/JSS/JHS	Never married/never lived together	15-34 years	Eastern	Urban	Richer	Improved source of drinking water	Unimproved
694	Male	15-34 years	Primary	Never married/never lived together	15-34 years	Brong Ahafo	Urban	Richer	Improved source of drinking water	Unimproved
695	Male	15-34 years	Primary	Never married/never lived together	15-34 years	Western	Urban	Richer	Improved source of drinking water	Unimproved
696	Male	15-34 years	Higher	Never married/never lived together	15-34 years	Western	Urban	Richest	Improved source of drinking water	Unimproved
697	Male	15-34 years	Secondary/SSS/SHS	Never married/never lived together	15-34 years	Western	Urban	Richer	Improved source of drinking water	Unimproved
698	Male	15-34 years	Higher	Never married/never lived together	15-34 years	Western	Urban	Richest	Improved source of drinking water	Unimproved
699	Male	15-34 years	Secondary/SSS/SHS	Never married/never lived together	15-34 years	Western	Urban	Richest	Improved source of drinking water	Unimproved
700	Male	15-34 years	Middle/JSS/JHS	Never married/never lived together	15-34 years	Western	Urban	Richer	Improved source of drinking water	Unimproved
701	Male	15-34 years	Middle/JSS/JHS	Never married/never lived together	15-34 years	Western	Urban	Middle	Improved source of drinking water	Unimproved
702	Male	15-34 years	Middle/JSS/JHS	Never married/never lived together	15-34 years	Greater Accra	Urban	Richer	Improved source of drinking water	Unimproved
703	Male	15-34 years	Middle/JSS/JHS	Never married/never lived together	15-34 years	Greater Accra	Urban	Richer	Improved source of drinking water	Unimproved
704	Male	15-34 years	Primary	Never married/never lived together	15-34 years	Greater Accra	Urban	Richer	Improved source of drinking water	Unimproved
705	Male	15-34 years	Middle/JSS/JHS	Never married/never lived together	15-34 years	Greater Accra	Urban	Richer	Improved source of drinking water	Unimproved
706	Male	15-34 years	Primary	Never married/never lived together	15-34 years	Greater Accra	Urban	Richer	Improved source of drinking water	Unimproved
707	Male	15-34 years	Secondary/SSS/SHS	Never married/never lived together	15-34 years	Greater Accra	Urban	Richer	Improved source of drinking water	Unimproved
708	Male	15-34 years	Primary	Never married/never lived together	15-34 years	Greater Accra	Urban	Middle	Improved source of drinking water	Unimproved
709	Male	15-34 years	Higher	Never married/never lived together	15-34 years	Brong Ahafo	Rural	Middle	Improved source of drinking water	Unimproved
710	Male	15-34 years	Primary	Never married/never lived together	15-34 years	Upper East	Rural	Poorer	Improved source of drinking water	Unimproved
711	Male	15-34 years	Higher	Never married/never lived together	15-34 years	Upper East	Rural	Poorest	Improved source of drinking water	Unimproved
712	Male	15-34 years	Middle/JSS/JHS	Never married/never lived together	15-34 years	Upper East	Rural	Poorest	Improved source of drinking water	Unimproved
713	Male	15-34 years	Middle/JSS/JHS	Never married/never lived together	15-34 years	Brong Ahafo	Rural	Poorer	Unimproved source of drinking water	Unimproved
714	Male	15-34 years	Primary	Never married/never lived together	15-34 years	Upper East	Rural	Poorest	Improved source of drinking water	Unimproved
715	Male	15-34 years	Middle/JSS/JHS	Never married/never lived together	15-34 years	Greater Accra	Urban	Richer	Improved source of drinking water	Unimproved
716	Male	15-34 years	Higher	Never married/never lived together	15-34 years	Greater Accra	Urban	Richest	Improved source of drinking water	Unimproved
717	Male	15-34 years	Higher	Never married/never lived together	15-34 years	Greater Accra	Urban	Richest	Improved source of drinking water	Improved
718	Male	15-34 years	Secondary/SSS/SHS	Never married/never lived together	15-34 years	Greater Accra	Urban	Richer	Improved source of drinking water	Unimproved
719	Male	15-34 years	Middle/JSS/JHS	Never married/never lived together	15-34 years	Greater Accra	Urban	Richer	Improved source of drinking water	Unimproved
720	Male	15-34 years	Higher	Never married/never lived together	15-34 years	Greater Accra	Urban	Richest	Improved source of drinking water	Improved
721	Male	15-34 years	Secondary/SSS/SHS	Never married/never lived together	15-34 years	Greater Accra	Urban	Richer	Improved source of drinking water	Unimproved
722	Male	15-34 years	Secondary/SSS/SHS	Never married/never lived together	15-34 years	Greater Accra	Urban	Richest	Improved source of drinking water	Unimproved
723	Male	15-34 years	Higher	Never married/never lived together	15-34 years	Greater Accra	Urban	Richer	Improved source of drinking water	Unimproved
724	Male	15-34 years	Secondary/SSS/SHS	Never married/never lived together	15-34 years	Greater Accra	Urban	Richest	Improved source of drinking water	Unimproved
725	Male	15-34 years	Higher	Never married/never lived together	15-34 years	Greater Accra	Urban	Richest	Improved source of drinking water	Unimproved
726	Male	15-34 years	Higher	Never married/never lived together	15-34 years	Greater Accra	Urban	Richest	Improved source of drinking water	Improved
727	Male	15-34 years	Secondary/SSS/SHS	Never married/never lived together	15-34 years	Ashanti	Urban	Richer	Improved source of drinking water	Unimproved
728	Male	15-34 years	Middle/JSS/JHS	Never married/never lived together	15-34 years	Central	Urban	Richer	Improved source of drinking water	Unimproved
729	Male	15-34 years	Middle/JSS/JHS	Never married/never lived together	15-34 years	Central	Urban	Richer	Improved source of drinking water	Unimproved
730	Male	15-34 years	Secondary/SSS/SHS	Never married/never lived together	15-34 years	Central	Urban	Middle	Improved source of drinking water	Unimproved
731	Male	15-34 years	Secondary/SSS/SHS	Never married/never lived together	15-34 years	Central	Urban	Richest	Improved source of drinking water	Unimproved
732	Male	15-34 years	Secondary/SSS/SHS	Never married/never lived together	15-34 years	Upper West	Rural	Poorer	Improved source of drinking water	Unimproved
733	Male	15-34 years	Middle/JSS/JHS	Never married/never lived together	15-34 years	Upper West	Rural	Poorer	Improved source of drinking water	Unimproved
734	Male	15-34 years	No education/preschool	Never married/never lived together	15-34 years	Upper West	Rural	Poorest	Improved source of drinking water	Unimproved
735	Male	15-34 years	Middle/JSS/JHS	Never married/never lived together	15-34 years	Upper West	Rural	Poorer	Improved source of drinking water	Unimproved
736	Male	15-34 years	No education/preschool	Never married/never lived together	15-34 years	Northern	Rural	Poorest	Improved source of drinking water	Unimproved
737	Male	15-34 years	Middle/JSS/JHS	Never married/never lived together	15-34 years	Brong Ahafo	Rural	Middle	Improved source of drinking water	Unimproved
738	Male	15-34 years	Middle/JSS/JHS	Never married/never lived together	15-34 years	Brong Ahafo	Rural	Poorer	Improved source of drinking water	Unimproved
739	Male	15-34 years	Middle/JSS/JHS	Never married/never lived together	15-34 years	Eastern	Urban	Richer	Unimproved source of drinking water	Unimproved
740	Male	15-34 years	Higher	Never married/never lived together	15-34 years	Eastern	Urban	Richer	Improved source of drinking water	Unimproved
741	Male	15-34 years	Higher	Never married/never lived together	15-34 years	Greater Accra	Urban	Richest	Improved source of drinking water	Unimproved
742	Male	15-34 years	Higher	Never married/never lived together	15-34 years	Greater Accra	Urban	Richest	Improved source of drinking water	Unimproved
743	Male	15-34 years	Higher	Never married/never lived together	15-34 years	Greater Accra	Urban	Richest	Improved source of drinking water	Unimproved
744	Male	15-34 years	Primary	Never married/never lived together	15-34 years	Brong Ahafo	Urban	Poorer	Improved source of drinking water	Unimproved
745	Male	15-34 years	Higher	Never married/never lived together	15-34 years	Brong Ahafo	Urban	Richest	Improved source of drinking water	Unimproved
746	Male	15-34 years	Secondary/SSS/SHS	Never married/never lived together	15-34 years	Brong Ahafo	Urban	Middle	Improved source of drinking water	Unimproved
747	Male	15-34 years	Higher	Never married/never lived together	15-34 years	Brong Ahafo	Urban	Richest	Improved source of drinking water	Unimproved
748	Male	15-34 years	Higher	Never married/never lived together	15-34 years	Brong Ahafo	Urban	Richest	Improved source of drinking water	Unimproved
749	Male	15-34 years	Middle/JSS/JHS	Never married/never lived together	15-34 years	Brong Ahafo	Urban	Richer	Improved source of drinking water	Unimproved
750	Male	15-34 years	Middle/JSS/JHS	Never married/never lived together	15-34 years	Brong Ahafo	Urban	Richest	Improved source of drinking water	Unimproved
751	Male	15-34 years	Higher	Never married/never lived together	15-34 years	Brong Ahafo	Urban	Richest	Improved source of drinking water	Unimproved
752	Male	15-34 years	No education/preschool	Never married/never lived together	15-34 years	Brong Ahafo	Rural	Middle	Improved source of drinking water	Unimproved
753	Male	15-34 years	Middle/JSS/JHS	Never married/never lived together	15-34 years	Brong Ahafo	Rural	Middle	Improved source of drinking water	Unimproved
754	Male	15-34 years	Middle/JSS/JHS	Never married/never lived together	15-34 years	Ashanti	Urban	Richest	Improved source of drinking water	Unimproved
755	Male	15-34 years	Middle/JSS/JHS	Never married/never lived together	15-34 years	Ashanti	Urban	Richer	Improved source of drinking water	Unimproved
756	Male	15-34 years	Secondary/SSS/SHS	Never married/never lived together	15-34 years	Ashanti	Urban	Richer	Improved source of drinking water	Improved
757	Male	15-34 years	Middle/JSS/JHS	Never married/never lived together	15-34 years	Ashanti	Urban	Richest	Improved source of drinking water	Unimproved
758	Male	15-34 years	Middle/JSS/JHS	Never married/never lived together	15-34 years	Ashanti	Urban	Richest	Improved source of drinking water	Unimproved
759	Male	15-34 years	Middle/JSS/JHS	Never married/never lived together	15-34 years	Volta	Urban	Middle	Improved source of drinking water	Improved
760	Male	15-34 years	Secondary/SSS/SHS	Never married/never lived together	15-34 years	Western	Urban	Richer	Improved source of drinking water	Unimproved
761	Male	15-34 years	Primary	Never married/never lived together	15-34 years	Western	Urban	Richest	Improved source of drinking water	Unimproved
762	Male	15-34 years	Higher	Never married/never lived together	15-34 years	Western	Urban	Richest	Improved source of drinking water	Improved
763	Male	15-34 years	Secondary/SSS/SHS	Never married/never lived together	15-34 years	Western	Urban	Richer	Improved source of drinking water	Unimproved
764	Male	15-34 years	Primary	Never married/never lived together	15-34 years	Western	Urban	Middle	Improved source of drinking water	Unimproved
765	Male	15-34 years	Secondary/SSS/SHS	Never married/never lived together	15-34 years	Western	Urban	Richest	Improved source of drinking water	Unimproved
766	Male	15-34 years	Secondary/SSS/SHS	Never married/never lived together	15-34 years	Western	Urban	Richest	Improved source of drinking water	Unimproved
767	Male	15-34 years	Secondary/SSS/SHS	Never married/never lived together	15-34 years	Western	Urban	Richest	Improved source of drinking water	Unimproved
768	Male	15-34 years	No education/preschool	Never married/never lived together	15-34 years	Ashanti	Urban	Richest	Improved source of drinking water	Unimproved
769	Male	15-34 years	Higher	Never married/never lived together	15-34 years	Ashanti	Urban	Richest	Improved source of drinking water	Unimproved
770	Male	15-34 years	Middle/JSS/JHS	Never married/never lived together	15-34 years	Ashanti	Urban	Richer	Improved source of drinking water	Unimproved
771	Male	15-34 years	Secondary/SSS/SHS	Never married/never lived together	15-34 years	Ashanti	Urban	Middle	Improved source of drinking water	Unimproved
772	Male	15-34 years	No education/preschool	Never married/never lived together	15-34 years	Upper West	Urban	Poorer	Improved source of drinking water	Unimproved
773	Male	15-34 years	Higher	Never married/never lived together	15-34 years	Upper West	Urban	Poorer	Improved source of drinking water	Unimproved
774	Male	15-34 years	Middle/JSS/JHS	Never married/never lived together	15-34 years	Greater Accra	Rural	Poorest	Unimproved source of drinking water	Unimproved
775	Male	15-34 years	Primary	Never married/never lived together	15-34 years	Greater Accra	Rural	Poorer	Improved source of drinking water	Unimproved
776	Male	15-34 years	Higher	Never married/never lived together	15-34 years	Greater Accra	Rural	Richer	Improved source of drinking water	Unimproved
777	Male	15-34 years	Higher	Never married/never lived together	15-34 years	Greater Accra	Rural	Middle	Improved source of drinking water	Unimproved
778	Male	15-34 years	Primary	Never married/never lived together	15-34 years	Greater Accra	Rural	Poorer	Improved source of drinking water	Unimproved
779	Male	15-34 years	Middle/JSS/JHS	Never married/never lived together	15-34 years	Eastern	Rural	Middle	Improved source of drinking water	Unimproved
780	Male	15-34 years	Middle/JSS/JHS	Never married/never lived together	15-34 years	Eastern	Rural	Poorer	Improved source of drinking water	Unimproved
781	Male	15-34 years	Higher	Never married/never lived together	15-34 years	Eastern	Rural	Richest	Improved source of drinking water	Unimproved
782	Male	15-34 years	Primary	Never married/never lived together	15-34 years	Greater Accra	Urban	Richer	Improved source of drinking water	Unimproved
783	Male	15-34 years	Primary	Never married/never lived together	15-34 years	Western	Urban	Richer	Improved source of drinking water	Unimproved
784	Male	15-34 years	Secondary/SSS/SHS	Never married/never lived together	15-34 years	Western	Urban	Richest	Improved source of drinking water	Unimproved
785	Male	15-34 years	Middle/JSS/JHS	Never married/never lived together	15-34 years	Ashanti	Urban	Richest	Improved source of drinking water	Unimproved
786	Male	15-34 years	Higher	Never married/never lived together	15-34 years	Ashanti	Urban	Richer	Improved source of drinking water	Unimproved
787	Male	15-34 years	Middle/JSS/JHS	Never married/never lived together	15-34 years	Ashanti	Urban	Richest	Improved source of drinking water	Unimproved
788	Male	15-34 years	Secondary/SSS/SHS	Never married/never lived together	15-34 years	Ashanti	Urban	Richest	Improved source of drinking water	Unimproved
789	Male	15-34 years	Higher	Never married/never lived together	15-34 years	Eastern	Urban	Richer	Improved source of drinking water	Unimproved
790	Male	15-34 years	Middle/JSS/JHS	Never married/never lived together	15-34 years	Eastern	Urban	Richer	Improved source of drinking water	Unimproved
791	Male	15-34 years	Higher	Never married/never lived together	15-34 years	Eastern	Urban	Richer	Improved source of drinking water	Unimproved
792	Male	15-34 years	Primary	Never married/never lived together	15-34 years	Eastern	Urban	Richer	Improved source of drinking water	Unimproved
793	Male	15-34 years	Middle/JSS/JHS	Never married/never lived together	15-34 years	Eastern	Urban	Middle	Improved source of drinking water	Unimproved
794	Male	15-34 years	Secondary/SSS/SHS	Never married/never lived together	15-34 years	Eastern	Urban	Richest	Improved source of drinking water	Improved
795	Male	15-34 years	Secondary/SSS/SHS	Never married/never lived together	15-34 years	Eastern	Urban	Middle	Improved source of drinking water	Unimproved
796	Male	15-34 years	Primary	Never married/never lived together	15-34 years	Eastern	Urban	Poorer	Improved source of drinking water	Unimproved
797	Male	15-34 years	No education/preschool	Never married/never lived together	15-34 years	Eastern	Rural	Middle	Improved source of drinking water	Unimproved
798	Male	15-34 years	Middle/JSS/JHS	Never married/never lived together	15-34 years	Eastern	Rural	Middle	Unimproved source of drinking water	Unimproved
799	Male	15-34 years	Middle/JSS/JHS	Never married/never lived together	15-34 years	Eastern	Rural	Poorer	Improved source of drinking water	Unimproved
800	Male	15-34 years	Middle/JSS/JHS	Never married/never lived together	15-34 years	Eastern	Rural	Middle	Improved source of drinking water	Unimproved
801	Male	15-34 years	Middle/JSS/JHS	Never married/never lived together	15-34 years	Western	Urban	Richer	Improved source of drinking water	Unimproved
802	Male	15-34 years	Secondary/SSS/SHS	Never married/never lived together	15-34 years	Western	Urban	Richest	Improved source of drinking water	Unimproved
803	Male	15-34 years	Primary	Never married/never lived together	15-34 years	Western	Urban	Richer	Unimproved source of drinking water	Unimproved
804	Male	15-34 years	Higher	Never married/never lived together	15-34 years	Central	Rural	Richest	Improved source of drinking water	Improved
805	Male	15-34 years	Middle/JSS/JHS	Never married/never lived together	15-34 years	Central	Rural	Richer	Improved source of drinking water	Unimproved
806	Male	15-34 years	Higher	Never married/never lived together	15-34 years	Brong Ahafo	Urban	Middle	Improved source of drinking water	Unimproved
807	Male	15-34 years	Primary	Never married/never lived together	15-34 years	Greater Accra	Rural	Middle	Improved source of drinking water	Unimproved
808	Male	15-34 years	Primary	Never married/never lived together	15-34 years	Greater Accra	Rural	Middle	Improved source of drinking water	Unimproved
809	Male	15-34 years	Primary	Never married/never lived together	15-34 years	Greater Accra	Rural	Middle	Improved source of drinking water	Unimproved
810	Male	15-34 years	Primary	Never married/never lived together	15-34 years	Greater Accra	Rural	Middle	Improved source of drinking water	Unimproved
811	Male	15-34 years	Secondary/SSS/SHS	Never married/never lived together	15-34 years	Brong Ahafo	Urban	Richer	Improved source of drinking water	Unimproved
812	Male	15-34 years	Secondary/SSS/SHS	Never married/never lived together	15-34 years	Brong Ahafo	Urban	Richer	Improved source of drinking water	Unimproved
813	Male	15-34 years	Secondary/SSS/SHS	Never married/never lived together	15-34 years	Brong Ahafo	Urban	Richer	Improved source of drinking water	Unimproved
814	Male	15-34 years	Higher	Never married/never lived together	15-34 years	Brong Ahafo	Urban	Richer	Improved source of drinking water	Unimproved
815	Male	15-34 years	Middle/JSS/JHS	Never married/never lived together	15-34 years	Brong Ahafo	Urban	Richer	Improved source of drinking water	Unimproved
816	Male	15-34 years	Secondary/SSS/SHS	Never married/never lived together	15-34 years	Greater Accra	Urban	Richer	Improved source of drinking water	Unimproved
817	Male	15-34 years	Middle/JSS/JHS	Never married/never lived together	15-34 years	Greater Accra	Urban	Middle	Improved source of drinking water	Unimproved
818	Male	15-34 years	Higher	Never married/never lived together	15-34 years	Greater Accra	Urban	Richest	Improved source of drinking water	Unimproved
819	Male	15-34 years	Higher	Never married/never lived together	15-34 years	Greater Accra	Urban	Richest	Improved source of drinking water	Unimproved
820	Male	15-34 years	Secondary/SSS/SHS	Never married/never lived together	15-34 years	Greater Accra	Urban	Middle	Improved source of drinking water	Unimproved
821	Male	15-34 years	Secondary/SSS/SHS	Never married/never lived together	15-34 years	Greater Accra	Urban	Richest	Improved source of drinking water	Unimproved
822	Male	15-34 years	Higher	Never married/never lived together	15-34 years	Greater Accra	Urban	Richest	Improved source of drinking water	Unimproved
823	Male	15-34 years	Middle/JSS/JHS	Never married/never lived together	15-34 years	Greater Accra	Urban	Richer	Improved source of drinking water	Unimproved
824	Male	15-34 years	Middle/JSS/JHS	Never married/never lived together	15-34 years	Brong Ahafo	Urban	Richer	Improved source of drinking water	Unimproved
825	Male	15-34 years	Higher	Never married/never lived together	15-34 years	Brong Ahafo	Urban	Richest	Improved source of drinking water	Unimproved
826	Male	15-34 years	Middle/JSS/JHS	Never married/never lived together	15-34 years	Brong Ahafo	Urban	Richer	Improved source of drinking water	Unimproved
827	Male	15-34 years	Middle/JSS/JHS	Never married/never lived together	15-34 years	Greater Accra	Urban	Richer	Improved source of drinking water	Unimproved
828	Male	15-34 years	Middle/JSS/JHS	Never married/never lived together	15-34 years	Greater Accra	Urban	Richer	Improved source of drinking water	Unimproved
829	Male	15-34 years	No education/preschool	Never married/never lived together	15-34 years	Greater Accra	Urban	Richer	Improved source of drinking water	Unimproved
830	Male	15-34 years	Secondary/SSS/SHS	Never married/never lived together	15-34 years	Greater Accra	Urban	Richest	Improved source of drinking water	Unimproved
831	Male	15-34 years	Middle/JSS/JHS	Never married/never lived together	15-34 years	Greater Accra	Urban	Richer	Improved source of drinking water	Unimproved
832	Male	15-34 years	Secondary/SSS/SHS	Never married/never lived together	15-34 years	Greater Accra	Urban	Richest	Improved source of drinking water	Unimproved
833	Male	15-34 years	Middle/JSS/JHS	Never married/never lived together	15-34 years	Greater Accra	Urban	Middle	Improved source of drinking water	Unimproved
834	Male	15-34 years	Secondary/SSS/SHS	Never married/never lived together	15-34 years	Greater Accra	Urban	Richest	Improved source of drinking water	Unimproved
835	Male	15-34 years	Middle/JSS/JHS	Never married/never lived together	15-34 years	Greater Accra	Urban	Richer	Improved source of drinking water	Unimproved
836	Male	15-34 years	Middle/JSS/JHS	Never married/never lived together	15-34 years	Central	Rural	Poorer	Unimproved source of drinking water	Unimproved
837	Male	15-34 years	Middle/JSS/JHS	Never married/never lived together	15-34 years	Central	Rural	Middle	Improved source of drinking water	Unimproved
838	Male	15-34 years	Secondary/SSS/SHS	Never married/never lived together	15-34 years	Volta	Rural	Poorer	Improved source of drinking water	Unimproved
839	Male	15-34 years	Secondary/SSS/SHS	Never married/never lived together	15-34 years	Western	Urban	Richer	Improved source of drinking water	Unimproved
840	Male	15-34 years	Secondary/SSS/SHS	Never married/never lived together	15-34 years	Western	Urban	Middle	Improved source of drinking water	Unimproved
841	Male	15-34 years	Middle/JSS/JHS	Never married/never lived together	15-34 years	Western	Urban	Richer	Improved source of drinking water	Unimproved
842	Male	15-34 years	Primary	Never married/never lived together	15-34 years	Western	Urban	Richer	Improved source of drinking water	Unimproved
843	Male	15-34 years	Secondary/SSS/SHS	Never married/never lived together	15-34 years	Western	Urban	Middle	Improved source of drinking water	Unimproved
844	Male	15-34 years	Middle/JSS/JHS	Never married/never lived together	15-34 years	Brong Ahafo	Rural	Middle	Improved source of drinking water	Unimproved
845	Male	15-34 years	Higher	Never married/never lived together	15-34 years	Brong Ahafo	Rural	Richer	Improved source of drinking water	Unimproved
846	Male	15-34 years	Higher	Never married/never lived together	15-34 years	Brong Ahafo	Rural	Middle	Improved source of drinking water	Unimproved
847	Male	15-34 years	Middle/JSS/JHS	Never married/never lived together	15-34 years	Brong Ahafo	Rural	Middle	Improved source of drinking water	Unimproved
848	Male	15-34 years	Higher	Never married/never lived together	15-34 years	Greater Accra	Urban	Richest	Improved source of drinking water	Improved
849	Male	15-34 years	Secondary/SSS/SHS	Never married/never lived together	15-34 years	Greater Accra	Urban	Richest	Improved source of drinking water	Improved
850	Male	15-34 years	Higher	Never married/never lived together	15-34 years	Western	Rural	Richer	Improved source of drinking water	Unimproved
851	Male	15-34 years	Secondary/SSS/SHS	Never married/never lived together	15-34 years	Western	Rural	Middle	Improved source of drinking water	Unimproved
852	Male	15-34 years	Secondary/SSS/SHS	Never married/never lived together	15-34 years	Western	Rural	Middle	Improved source of drinking water	Unimproved
853	Male	15-34 years	Higher	Never married/never lived together	15-34 years	Western	Rural	Richer	Improved source of drinking water	Unimproved
854	Male	15-34 years	Higher	Never married/never lived together	15-34 years	Upper West	Urban	Richer	Improved source of drinking water	Unimproved
855	Male	15-34 years	Higher	Never married/never lived together	15-34 years	Upper West	Urban	Poorer	Improved source of drinking water	Unimproved
856	Male	15-34 years	Higher	Never married/never lived together	15-34 years	Upper West	Urban	Richest	Improved source of drinking water	Unimproved
857	Male	15-34 years	Higher	Never married/never lived together	15-34 years	Upper West	Urban	Richer	Improved source of drinking water	Unimproved
858	Male	15-34 years	Higher	Never married/never lived together	15-34 years	Upper West	Urban	Richest	Improved source of drinking water	Improved
859	Male	15-34 years	Secondary/SSS/SHS	Never married/never lived together	15-34 years	Upper West	Urban	Middle	Improved source of drinking water	Unimproved
860	Male	15-34 years	Middle/JSS/JHS	Never married/never lived together	15-34 years	Western	Rural	Richer	Improved source of drinking water	Unimproved
861	Male	15-34 years	Higher	Never married/never lived together	15-34 years	Brong Ahafo	Rural	Richer	Improved source of drinking water	Unimproved
862	Male	15-34 years	Middle/JSS/JHS	Never married/never lived together	15-34 years	Brong Ahafo	Rural	Poorest	Improved source of drinking water	Unimproved
863	Male	15-34 years	Higher	Never married/never lived together	15-34 years	Ashanti	Rural	Middle	Improved source of drinking water	Unimproved
864	Male	15-34 years	Secondary/SSS/SHS	Never married/never lived together	15-34 years	Greater Accra	Urban	Richest	Improved source of drinking water	Unimproved
865	Male	15-34 years	Middle/JSS/JHS	Never married/never lived together	15-34 years	Greater Accra	Urban	Richer	Improved source of drinking water	Unimproved
866	Male	15-34 years	Primary	Never married/never lived together	15-34 years	Western	Urban	Richer	Improved source of drinking water	Unimproved
867	Male	15-34 years	Higher	Never married/never lived together	15-34 years	Western	Urban	Richest	Improved source of drinking water	Improved
868	Male	15-34 years	Higher	Never married/never lived together	15-34 years	Western	Urban	Richest	Improved source of drinking water	Unimproved
869	Male	15-34 years	Middle/JSS/JHS	Never married/never lived together	15-34 years	Western	Urban	Richest	Improved source of drinking water	Unimproved
870	Male	15-34 years	Middle/JSS/JHS	Never married/never lived together	15-34 years	Western	Urban	Richest	Improved source of drinking water	Improved
871	Male	15-34 years	Higher	Never married/never lived together	15-34 years	Western	Urban	Richest	Improved source of drinking water	Unimproved
872	Male	15-34 years	Secondary/SSS/SHS	Never married/never lived together	15-34 years	Western	Urban	Richer	Improved source of drinking water	Unimproved
873	Male	15-34 years	Secondary/SSS/SHS	Never married/never lived together	15-34 years	Greater Accra	Urban	Richest	Improved source of drinking water	Unimproved
874	Male	15-34 years	Primary	Never married/never lived together	15-34 years	Greater Accra	Urban	Richer	Improved source of drinking water	Unimproved
875	Male	15-34 years	Secondary/SSS/SHS	Never married/never lived together	15-34 years	Greater Accra	Urban	Richest	Improved source of drinking water	Unimproved
876	Male	15-34 years	Middle/JSS/JHS	Never married/never lived together	15-34 years	Greater Accra	Urban	Richest	Improved source of drinking water	Unimproved
877	Male	15-34 years	Secondary/SSS/SHS	Never married/never lived together	15-34 years	Northern	Urban	Richest	Improved source of drinking water	Unimproved
878	Male	15-34 years	Secondary/SSS/SHS	Never married/never lived together	15-34 years	Northern	Urban	Richer	Improved source of drinking water	Unimproved
879	Male	15-34 years	Secondary/SSS/SHS	Never married/never lived together	15-34 years	Northern	Urban	Richer	Improved source of drinking water	Unimproved
880	Male	15-34 years	Higher	Never married/never lived together	15-34 years	Northern	Urban	Richer	Improved source of drinking water	Unimproved
881	Male	15-34 years	Higher	Never married/never lived together	15-34 years	Northern	Urban	Richest	Improved source of drinking water	Unimproved
882	Male	15-34 years	Middle/JSS/JHS	Never married/never lived together	15-34 years	Brong Ahafo	Urban	Richest	Improved source of drinking water	Unimproved
883	Male	15-34 years	Middle/JSS/JHS	Never married/never lived together	15-34 years	Brong Ahafo	Urban	Richer	Improved source of drinking water	Unimproved
884	Male	15-34 years	Middle/JSS/JHS	Never married/never lived together	15-34 years	Greater Accra	Urban	Richest	Improved source of drinking water	Unimproved
885	Male	15-34 years	Secondary/SSS/SHS	Never married/never lived together	15-34 years	Greater Accra	Urban	Richer	Improved source of drinking water	Unimproved
886	Male	15-34 years	Higher	Never married/never lived together	15-34 years	Central	Urban	Richest	Improved source of drinking water	Unimproved
887	Male	15-34 years	Middle/JSS/JHS	Never married/never lived together	15-34 years	Upper East	Urban	Poorer	Improved source of drinking water	Unimproved
888	Male	15-34 years	Secondary/SSS/SHS	Never married/never lived together	15-34 years	Upper East	Urban	Poorest	Improved source of drinking water	Unimproved
889	Male	15-34 years	Middle/JSS/JHS	Never married/never lived together	15-34 years	Brong Ahafo	Urban	Middle	Improved source of drinking water	Unimproved
890	Male	15-34 years	Secondary/SSS/SHS	Never married/never lived together	15-34 years	Brong Ahafo	Urban	Middle	Improved source of drinking water	Unimproved
891	Male	15-34 years	Middle/JSS/JHS	Never married/never lived together	15-34 years	Brong Ahafo	Urban	Middle	Improved source of drinking water	Unimproved
892	Male	15-34 years	Secondary/SSS/SHS	Never married/never lived together	15-34 years	Brong Ahafo	Urban	Middle	Improved source of drinking water	Unimproved
893	Male	15-34 years	Higher	Never married/never lived together	15-34 years	Brong Ahafo	Urban	Richer	Improved source of drinking water	Unimproved
894	Male	15-34 years	Secondary/SSS/SHS	Never married/never lived together	15-34 years	Ashanti	Rural	Poorer	Improved source of drinking water	Unimproved
895	Male	15-34 years	Secondary/SSS/SHS	Never married/never lived together	15-34 years	Ashanti	Rural	Middle	Improved source of drinking water	Unimproved
896	Male	15-34 years	Higher	Never married/never lived together	15-34 years	Ashanti	Rural	Middle	Improved source of drinking water	Unimproved
897	Male	15-34 years	Secondary/SSS/SHS	Never married/never lived together	15-34 years	Greater Accra	Rural	Richer	Improved source of drinking water	Unimproved
898	Male	15-34 years	Secondary/SSS/SHS	Never married/never lived together	15-34 years	Greater Accra	Rural	Middle	Improved source of drinking water	Unimproved
899	Male	15-34 years	Higher	Never married/never lived together	15-34 years	Greater Accra	Rural	Middle	Improved source of drinking water	Unimproved
900	Male	15-34 years	Middle/JSS/JHS	Never married/never lived together	15-34 years	Brong Ahafo	Rural	Poorer	Improved source of drinking water	Unimproved
901	Male	15-34 years	No education/preschool	Never married/never lived together	15-34 years	Brong Ahafo	Rural	Poorer	Improved source of drinking water	Unimproved
902	Male	15-34 years	Secondary/SSS/SHS	Never married/never lived together	15-34 years	Central	Urban	Richest	Improved source of drinking water	Improved
903	Male	15-34 years	Higher	Never married/never lived together	15-34 years	Central	Urban	Richest	Improved source of drinking water	Unimproved
904	Male	15-34 years	Secondary/SSS/SHS	Never married/never lived together	15-34 years	Eastern	Urban	Richest	Improved source of drinking water	Unimproved
905	Male	15-34 years	Higher	Never married/never lived together	15-34 years	Ashanti	Urban	Richest	Improved source of drinking water	Improved
906	Male	15-34 years	Higher	Never married/never lived together	15-34 years	Ashanti	Urban	Richest	Improved source of drinking water	Improved
907	Male	15-34 years	Secondary/SSS/SHS	Never married/never lived together	15-34 years	Upper East	Rural	Poorest	Improved source of drinking water	Unimproved
908	Male	15-34 years	Secondary/SSS/SHS	Never married/never lived together	15-34 years	Upper East	Rural	Poorest	Unimproved source of drinking water	Unimproved
909	Male	15-34 years	Middle/JSS/JHS	Never married/never lived together	15-34 years	Ashanti	Urban	Richest	Improved source of drinking water	Unimproved
910	Male	15-34 years	Middle/JSS/JHS	Never married/never lived together	15-34 years	Ashanti	Urban	Richest	Improved source of drinking water	Unimproved
911	Male	15-34 years	Middle/JSS/JHS	Never married/never lived together	15-34 years	Ashanti	Urban	Richest	Improved source of drinking water	Unimproved
912	Male	15-34 years	Secondary/SSS/SHS	Never married/never lived together	15-34 years	Northern	Urban	Richer	Improved source of drinking water	Unimproved
913	Male	15-34 years	Middle/JSS/JHS	Never married/never lived together	15-34 years	Northern	Urban	Middle	Improved source of drinking water	Unimproved
914	Male	15-34 years	Higher	Never married/never lived together	15-34 years	Ashanti	Rural	Middle	Unimproved source of drinking water	Unimproved
915	Male	15-34 years	Primary	Never married/never lived together	15-34 years	Ashanti	Rural	Poorest	Unimproved source of drinking water	Unimproved
916	Male	15-34 years	Primary	Never married/never lived together	15-34 years	Central	Rural	Poorest	Improved source of drinking water	Unimproved
917	Male	15-34 years	Middle/JSS/JHS	Never married/never lived together	15-34 years	Central	Rural	Poorest	Improved source of drinking water	Unimproved
918	Male	15-34 years	Higher	Never married/never lived together	15-34 years	Greater Accra	Urban	Richer	Improved source of drinking water	Unimproved
919	Male	15-34 years	Middle/JSS/JHS	Never married/never lived together	15-34 years	Greater Accra	Urban	Middle	Improved source of drinking water	Unimproved
920	Male	15-34 years	Middle/JSS/JHS	Never married/never lived together	15-34 years	Greater Accra	Urban	Middle	Improved source of drinking water	Unimproved
921	Male	15-34 years	Higher	Never married/never lived together	15-34 years	Greater Accra	Urban	Richest	Improved source of drinking water	Improved
922	Male	15-34 years	Secondary/SSS/SHS	Never married/never lived together	15-34 years	Western	Urban	Richer	Improved source of drinking water	Improved
923	Male	15-34 years	Secondary/SSS/SHS	Never married/never lived together	15-34 years	Upper East	Urban	Poorer	Improved source of drinking water	Unimproved
924	Male	15-34 years	Secondary/SSS/SHS	Never married/never lived together	15-34 years	Upper East	Urban	Poorer	Improved source of drinking water	Unimproved
925	Male	15-34 years	Primary	Never married/never lived together	15-34 years	Upper East	Urban	Middle	Improved source of drinking water	Unimproved
926	Male	15-34 years	Primary	Never married/never lived together	15-34 years	Upper East	Rural	Poorer	Improved source of drinking water	Unimproved
927	Male	15-34 years	Secondary/SSS/SHS	Never married/never lived together	15-34 years	Eastern	Urban	Middle	Improved source of drinking water	Unimproved
928	Male	15-34 years	Primary	Never married/never lived together	15-34 years	Eastern	Urban	Richer	Improved source of drinking water	Unimproved
929	Male	15-34 years	Secondary/SSS/SHS	Never married/never lived together	15-34 years	Eastern	Urban	Richer	Improved source of drinking water	Unimproved
930	Male	15-34 years	Middle/JSS/JHS	Never married/never lived together	15-34 years	Eastern	Urban	Richer	Improved source of drinking water	Unimproved
931	Male	15-34 years	Middle/JSS/JHS	Never married/never lived together	15-34 years	Eastern	Urban	Richest	Improved source of drinking water	Unimproved
932	Male	15-34 years	Middle/JSS/JHS	Never married/never lived together	15-34 years	Eastern	Urban	Richer	Improved source of drinking water	Unimproved
933	Male	15-34 years	Higher	Never married/never lived together	15-34 years	Eastern	Urban	Richer	Improved source of drinking water	Unimproved
934	Male	15-34 years	Secondary/SSS/SHS	Never married/never lived together	15-34 years	Eastern	Urban	Richest	Improved source of drinking water	Unimproved
935	Male	15-34 years	Higher	Never married/never lived together	15-34 years	Eastern	Urban	Richest	Improved source of drinking water	Unimproved
936	Male	15-34 years	Higher	Never married/never lived together	15-34 years	Eastern	Urban	Richest	Improved source of drinking water	Unimproved
937	Male	15-34 years	Middle/JSS/JHS	Never married/never lived together	15-34 years	Eastern	Urban	Richest	Improved source of drinking water	Unimproved
938	Male	15-34 years	Middle/JSS/JHS	Never married/never lived together	15-34 years	Eastern	Urban	Middle	Improved source of drinking water	Unimproved
939	Male	15-34 years	Secondary/SSS/SHS	Never married/never lived together	15-34 years	Brong Ahafo	Rural	Middle	Improved source of drinking water	Unimproved
940	Male	15-34 years	Middle/JSS/JHS	Never married/never lived together	15-34 years	Brong Ahafo	Rural	Middle	Improved source of drinking water	Unimproved
941	Male	15-34 years	Secondary/SSS/SHS	Never married/never lived together	15-34 years	Volta	Urban	Richer	Improved source of drinking water	Unimproved
942	Male	15-34 years	Middle/JSS/JHS	Never married/never lived together	15-34 years	Northern	Urban	Poorest	Unimproved source of drinking water	Unimproved
943	Male	15-34 years	Primary	Never married/never lived together	15-34 years	Northern	Urban	Poorest	Unimproved source of drinking water	Unimproved
944	Male	15-34 years	Primary	Never married/never lived together	15-34 years	Northern	Urban	Poorer	Unimproved source of drinking water	Unimproved
945	Male	15-34 years	Primary	Never married/never lived together	15-34 years	Northern	Urban	Poorest	Unimproved source of drinking water	Unimproved
946	Male	15-34 years	Primary	Never married/never lived together	15-34 years	Ashanti	Urban	Poorer	Improved source of drinking water	Unimproved
947	Male	15-34 years	Middle/JSS/JHS	Never married/never lived together	15-34 years	Ashanti	Urban	Richer	Improved source of drinking water	Unimproved
948	Male	15-34 years	Higher	Never married/never lived together	15-34 years	Ashanti	Urban	Richest	Improved source of drinking water	Unimproved
949	Male	15-34 years	Primary	Never married/never lived together	15-34 years	Ashanti	Urban	Richer	Improved source of drinking water	Unimproved
950	Male	15-34 years	Secondary/SSS/SHS	Never married/never lived together	15-34 years	Brong Ahafo	Rural	Middle	Improved source of drinking water	Unimproved
951	Male	15-34 years	Higher	Never married/never lived together	15-34 years	Brong Ahafo	Rural	Middle	Improved source of drinking water	Unimproved
952	Male	15-34 years	Middle/JSS/JHS	Never married/never lived together	15-34 years	Brong Ahafo	Rural	Middle	Improved source of drinking water	Unimproved
953	Male	15-34 years	Secondary/SSS/SHS	Never married/never lived together	15-34 years	Greater Accra	Urban	Richest	Improved source of drinking water	Unimproved
954	Male	15-34 years	Primary	Never married/never lived together	15-34 years	Greater Accra	Urban	Richer	Improved source of drinking water	Unimproved
955	Male	15-34 years	Higher	Never married/never lived together	15-34 years	Greater Accra	Urban	Richest	Improved source of drinking water	Unimproved
956	Male	15-34 years	Middle/JSS/JHS	Never married/never lived together	15-34 years	Eastern	Rural	Poorer	Improved source of drinking water	Unimproved
957	Male	15-34 years	Higher	Never married/never lived together	15-34 years	Upper East	Urban	Poorer	Improved source of drinking water	Unimproved
958	Male	15-34 years	Higher	Never married/never lived together	15-34 years	Upper East	Urban	Richest	Improved source of drinking water	Unimproved
959	Male	15-34 years	Middle/JSS/JHS	Never married/never lived together	15-34 years	Greater Accra	Urban	Richest	Improved source of drinking water	Unimproved
960	Male	15-34 years	Secondary/SSS/SHS	Never married/never lived together	15-34 years	Greater Accra	Urban	Richest	Improved source of drinking water	Unimproved
961	Male	15-34 years	Secondary/SSS/SHS	Never married/never lived together	15-34 years	Brong Ahafo	Urban	Middle	Improved source of drinking water	Unimproved
962	Male	15-34 years	Secondary/SSS/SHS	Never married/never lived together	15-34 years	Upper East	Urban	Middle	Improved source of drinking water	Unimproved
963	Male	15-34 years	Secondary/SSS/SHS	Never married/never lived together	15-34 years	Upper East	Urban	Middle	Improved source of drinking water	Unimproved
964	Male	15-34 years	Secondary/SSS/SHS	Never married/never lived together	15-34 years	Upper East	Urban	Poorer	Improved source of drinking water	Unimproved
965	Male	15-34 years	Middle/JSS/JHS	Never married/never lived together	15-34 years	Ashanti	Urban	Richer	Improved source of drinking water	Unimproved
966	Male	15-34 years	Middle/JSS/JHS	Never married/never lived together	15-34 years	Ashanti	Urban	Richer	Improved source of drinking water	Unimproved
967	Male	15-34 years	Middle/JSS/JHS	Never married/never lived together	15-34 years	Ashanti	Urban	Richest	Improved source of drinking water	Unimproved
968	Male	15-34 years	Higher	Never married/never lived together	15-34 years	Ashanti	Urban	Richest	Improved source of drinking water	Unimproved
969	Male	15-34 years	Middle/JSS/JHS	Never married/never lived together	15-34 years	Greater Accra	Urban	Richest	Improved source of drinking water	Unimproved
970	Male	15-34 years	Higher	Never married/never lived together	15-34 years	Greater Accra	Urban	Richest	Improved source of drinking water	Unimproved
971	Male	15-34 years	Secondary/SSS/SHS	Never married/never lived together	15-34 years	Greater Accra	Urban	Richest	Improved source of drinking water	Unimproved
972	Male	15-34 years	Higher	Never married/never lived together	15-34 years	Greater Accra	Urban	Richest	Improved source of drinking water	Unimproved
973	Male	15-34 years	Middle/JSS/JHS	Never married/never lived together	15-34 years	Greater Accra	Urban	Richer	Improved source of drinking water	Unimproved
974	Male	15-34 years	Secondary/SSS/SHS	Never married/never lived together	15-34 years	Eastern	Rural	Richer	Improved source of drinking water	Unimproved
975	Male	15-34 years	No education/preschool	Never married/never lived together	15-34 years	Upper East	Rural	Poorest	Improved source of drinking water	Unimproved
976	Male	15-34 years	Secondary/SSS/SHS	Never married/never lived together	15-34 years	Greater Accra	Urban	Richest	Improved source of drinking water	Unimproved
977	Male	15-34 years	Middle/JSS/JHS	Never married/never lived together	15-34 years	Greater Accra	Urban	Richer	Improved source of drinking water	Unimproved
978	Male	15-34 years	Higher	Never married/never lived together	15-34 years	Greater Accra	Urban	Richest	Improved source of drinking water	Improved
979	Male	15-34 years	Middle/JSS/JHS	Never married/never lived together	15-34 years	Central	Rural	Richer	Improved source of drinking water	Unimproved
980	Male	15-34 years	Higher	Never married/never lived together	15-34 years	Central	Rural	Poorer	Improved source of drinking water	Unimproved
981	Male	15-34 years	No education/preschool	Never married/never lived together	15-34 years	Northern	Rural	Poorest	Unimproved source of drinking water	Unimproved
982	Male	15-34 years	Middle/JSS/JHS	Never married/never lived together	15-34 years	Northern	Rural	Poorest	Unimproved source of drinking water	Unimproved
983	Male	15-34 years	Middle/JSS/JHS	Never married/never lived together	15-34 years	Eastern	Urban	Richer	Improved source of drinking water	Unimproved
984	Male	15-34 years	Higher	Never married/never lived together	15-34 years	Eastern	Urban	Richer	Improved source of drinking water	Unimproved
985	Male	15-34 years	Primary	Never married/never lived together	15-34 years	Ashanti	Urban	Richest	Improved source of drinking water	Unimproved
986	Male	15-34 years	Middle/JSS/JHS	Never married/never lived together	15-34 years	Ashanti	Urban	Richest	Improved source of drinking water	Unimproved
987	Male	15-34 years	Higher	Never married/never lived together	15-34 years	Ashanti	Urban	Richest	Improved source of drinking water	Unimproved
988	Male	15-34 years	Higher	Never married/never lived together	15-34 years	Ashanti	Urban	Richer	Improved source of drinking water	Unimproved
989	Male	15-34 years	Middle/JSS/JHS	Never married/never lived together	15-34 years	Ashanti	Urban	Richest	Improved source of drinking water	Unimproved
990	Male	15-34 years	Secondary/SSS/SHS	Never married/never lived together	15-34 years	Greater Accra	Urban	Richest	Improved source of drinking water	Unimproved
991	Male	15-34 years	Secondary/SSS/SHS	Never married/never lived together	15-34 years	Greater Accra	Urban	Richest	Improved source of drinking water	Unimproved
992	Male	15-34 years	Middle/JSS/JHS	Never married/never lived together	15-34 years	Greater Accra	Urban	Richest	Improved source of drinking water	Unimproved
993	Male	15-34 years	Middle/JSS/JHS	Never married/never lived together	15-34 years	Greater Accra	Urban	Richer	Improved source of drinking water	Unimproved
994	Male	15-34 years	Middle/JSS/JHS	Never married/never lived together	15-34 years	Greater Accra	Urban	Richer	Improved source of drinking water	Unimproved
995	Male	15-34 years	No education/preschool	Never married/never lived together	15-34 years	Upper West	Rural	Poorest	Improved source of drinking water	Unimproved
996	Male	15-34 years	Primary	Never married/never lived together	15-34 years	Eastern	Urban	Richer	Improved source of drinking water	Unimproved
997	Male	15-34 years	Higher	Never married/never lived together	15-34 years	Eastern	Urban	Richest	Improved source of drinking water	Unimproved
998	Male	15-34 years	Middle/JSS/JHS	Never married/never lived together	15-34 years	Eastern	Urban	Richer	Improved source of drinking water	Unimproved
999	Male	15-34 years	Middle/JSS/JHS	Never married/never lived together	15-34 years	Upper East	Rural	Poorest	Improved source of drinking water	Unimproved
1000	Male	15-34 years	Higher	Never married/never lived together	15-34 years	Eastern	Urban	Richest	Improved source of drinking water	Unimproved
1001	Male	15-34 years	Higher	Never married/never lived together	15-34 years	Eastern	Urban	Richest	Improved source of drinking water	Unimproved
1002	Male	15-34 years	Higher	Never married/never lived together	15-34 years	Central	Urban	Richest	Improved source of drinking water	Improved
1003	Male	15-34 years	Middle/JSS/JHS	Never married/never lived together	15-34 years	Brong Ahafo	Urban	Richer	Improved source of drinking water	Unimproved
1004	Male	15-34 years	Secondary/SSS/SHS	Never married/never lived together	15-34 years	Brong Ahafo	Urban	Middle	Improved source of drinking water	Unimproved
1005	Male	15-34 years	Middle/JSS/JHS	Never married/never lived together	15-34 years	Brong Ahafo	Urban	Richer	Improved source of drinking water	Unimproved
1006	Male	15-34 years	Secondary/SSS/SHS	Never married/never lived together	15-34 years	Brong Ahafo	Urban	Middle	Improved source of drinking water	Unimproved
1007	Male	15-34 years	Higher	Never married/never lived together	15-34 years	Volta	Rural	Richer	Improved source of drinking water	Improved
1008	Male	15-34 years	Secondary/SSS/SHS	Never married/never lived together	15-34 years	Volta	Rural	Middle	Improved source of drinking water	Unimproved
1009	Male	15-34 years	Middle/JSS/JHS	Never married/never lived together	15-34 years	Ashanti	Urban	Richer	Improved source of drinking water	Unimproved
1010	Male	15-34 years	Secondary/SSS/SHS	Never married/never lived together	15-34 years	Ashanti	Urban	Richest	Improved source of drinking water	Unimproved
1011	Male	15-34 years	Middle/JSS/JHS	Never married/never lived together	15-34 years	Ashanti	Urban	Richer	Improved source of drinking water	Unimproved
1012	Male	15-34 years	Middle/JSS/JHS	Never married/never lived together	15-34 years	Ashanti	Urban	Richest	Improved source of drinking water	Unimproved
1013	Male	15-34 years	Middle/JSS/JHS	Never married/never lived together	15-34 years	Ashanti	Urban	Richer	Improved source of drinking water	Unimproved
1014	Male	15-34 years	Secondary/SSS/SHS	Never married/never lived together	15-34 years	Ashanti	Urban	Richest	Improved source of drinking water	Unimproved
1015	Male	15-34 years	No education/preschool	Never married/never lived together	15-34 years	Northern	Urban	Middle	Improved source of drinking water	Unimproved
1016	Male	15-34 years	Primary	Never married/never lived together	15-34 years	Northern	Urban	Richer	Improved source of drinking water	Unimproved
1017	Male	15-34 years	Higher	Never married/never lived together	15-34 years	Northern	Urban	Richest	Improved source of drinking water	Unimproved
1018	Male	15-34 years	Secondary/SSS/SHS	Never married/never lived together	15-34 years	Northern	Urban	Middle	Improved source of drinking water	Unimproved
1019	Male	15-34 years	Middle/JSS/JHS	Never married/never lived together	15-34 years	Upper East	Rural	Poorest	Improved source of drinking water	Unimproved
1020	Male	15-34 years	Middle/JSS/JHS	Never married/never lived together	15-34 years	Central	Rural	Poorer	Improved source of drinking water	Unimproved
1021	Male	15-34 years	Secondary/SSS/SHS	Never married/never lived together	15-34 years	Volta	Rural	Poorer	Improved source of drinking water	Unimproved
1022	Male	15-34 years	Primary	Never married/never lived together	15-34 years	Volta	Rural	Poorest	Unimproved source of drinking water	Unimproved
1023	Male	15-34 years	Secondary/SSS/SHS	Never married/never lived together	15-34 years	Volta	Rural	Middle	Improved source of drinking water	Unimproved
1024	Male	15-34 years	Secondary/SSS/SHS	Never married/never lived together	15-34 years	Volta	Urban	Middle	Unimproved source of drinking water	Unimproved
1025	Male	15-34 years	Middle/JSS/JHS	Never married/never lived together	15-34 years	Volta	Urban	Richer	Unimproved source of drinking water	Unimproved
1026	Male	15-34 years	Middle/JSS/JHS	Never married/never lived together	15-34 years	Volta	Urban	Middle	Unimproved source of drinking water	Unimproved
1027	Male	15-34 years	Middle/JSS/JHS	Never married/never lived together	15-34 years	Western	Urban	Richer	Improved source of drinking water	Unimproved
1028	Male	15-34 years	Higher	Never married/never lived together	15-34 years	Western	Urban	Richest	Improved source of drinking water	Unimproved
1029	Male	15-34 years	Middle/JSS/JHS	Never married/never lived together	15-34 years	Western	Urban	Middle	Improved source of drinking water	Unimproved
1030	Male	15-34 years	Middle/JSS/JHS	Never married/never lived together	15-34 years	Western	Urban	Richer	Improved source of drinking water	Unimproved
1031	Male	15-34 years	Secondary/SSS/SHS	Never married/never lived together	15-34 years	Western	Urban	Richest	Improved source of drinking water	Unimproved
1032	Male	15-34 years	Secondary/SSS/SHS	Never married/never lived together	15-34 years	Brong Ahafo	Rural	Middle	Improved source of drinking water	Improved
1033	Male	15-34 years	Secondary/SSS/SHS	Never married/never lived together	15-34 years	Upper East	Urban	Richest	Improved source of drinking water	Improved
1034	Male	15-34 years	Secondary/SSS/SHS	Never married/never lived together	15-34 years	Upper East	Urban	Richer	Improved source of drinking water	Unimproved
1035	Male	15-34 years	Primary	Never married/never lived together	15-34 years	Upper East	Urban	Poorest	Improved source of drinking water	Unimproved
1036	Male	15-34 years	Middle/JSS/JHS	Never married/never lived together	15-34 years	Eastern	Rural	Middle	Improved source of drinking water	Unimproved
1037	Male	15-34 years	Primary	Never married/never lived together	15-34 years	Eastern	Rural	Poorer	Unimproved source of drinking water	Unimproved
1038	Male	15-34 years	Primary	Never married/never lived together	15-34 years	Upper East	Rural	Poorest	Improved source of drinking water	Unimproved
1039	Male	15-34 years	Primary	Never married/never lived together	15-34 years	Upper East	Rural	Poorest	Improved source of drinking water	Unimproved
1040	Male	15-34 years	Primary	Never married/never lived together	15-34 years	Central	Urban	Richer	Improved source of drinking water	Unimproved
1041	Male	15-34 years	Middle/JSS/JHS	Never married/never lived together	15-34 years	Central	Urban	Richer	Improved source of drinking water	Unimproved
1042	Male	15-34 years	Secondary/SSS/SHS	Never married/never lived together	15-34 years	Upper East	Rural	Poorest	Improved source of drinking water	Unimproved
1043	Male	15-34 years	Middle/JSS/JHS	Never married/never lived together	15-34 years	Upper East	Rural	Poorest	Improved source of drinking water	Unimproved
1044	Male	15-34 years	Higher	Never married/never lived together	15-34 years	Upper East	Rural	Poorest	Unimproved source of drinking water	Unimproved
1045	Male	15-34 years	Middle/JSS/JHS	Never married/never lived together	15-34 years	Upper East	Rural	Poorest	Unimproved source of drinking water	Unimproved
1046	Male	15-34 years	Primary	Never married/never lived together	15-34 years	Greater Accra	Rural	Poorer	Improved source of drinking water	Unimproved
1047	Male	15-34 years	Middle/JSS/JHS	Never married/never lived together	15-34 years	Upper East	Urban	Poorer	Improved source of drinking water	Unimproved
1048	Male	15-34 years	Higher	Never married/never lived together	15-34 years	Upper East	Urban	Middle	Improved source of drinking water	Unimproved
1049	Male	15-34 years	Secondary/SSS/SHS	Never married/never lived together	15-34 years	Greater Accra	Urban	Richest	Improved source of drinking water	Unimproved
1050	Male	15-34 years	Middle/JSS/JHS	Never married/never lived together	15-34 years	Greater Accra	Urban	Richest	Improved source of drinking water	Unimproved
1051	Male	15-34 years	Middle/JSS/JHS	Never married/never lived together	15-34 years	Greater Accra	Urban	Middle	Improved source of drinking water	Unimproved
1052	Male	15-34 years	Secondary/SSS/SHS	Never married/never lived together	15-34 years	Greater Accra	Urban	Richest	Improved source of drinking water	Unimproved
1053	Male	15-34 years	No education/preschool	Never married/never lived together	15-34 years	Greater Accra	Urban	Richer	Improved source of drinking water	Unimproved
1054	Male	15-34 years	Middle/JSS/JHS	Never married/never lived together	15-34 years	Greater Accra	Urban	Richest	Improved source of drinking water	Improved
1055	Male	15-34 years	Secondary/SSS/SHS	Never married/never lived together	15-34 years	Greater Accra	Urban	Richest	Improved source of drinking water	Unimproved
1056	Male	15-34 years	Secondary/SSS/SHS	Never married/never lived together	15-34 years	Greater Accra	Urban	Richer	Improved source of drinking water	Unimproved
1057	Male	15-34 years	Primary	Never married/never lived together	15-34 years	Volta	Rural	Poorer	Improved source of drinking water	Unimproved
1058	Male	15-34 years	Primary	Never married/never lived together	15-34 years	Volta	Rural	Poorer	Improved source of drinking water	Unimproved
1059	Male	15-34 years	Primary	Never married/never lived together	15-34 years	Volta	Rural	Poorer	Improved source of drinking water	Unimproved
1060	Male	15-34 years	Primary	Never married/never lived together	15-34 years	Eastern	Rural	Middle	Improved source of drinking water	Unimproved
1061	Male	15-34 years	Secondary/SSS/SHS	Never married/never lived together	15-34 years	Eastern	Rural	Poorer	Unimproved source of drinking water	Unimproved
1062	Male	15-34 years	Primary	Never married/never lived together	15-34 years	Eastern	Rural	Poorer	Improved source of drinking water	Unimproved
1063	Male	15-34 years	Middle/JSS/JHS	Never married/never lived together	15-34 years	Central	Urban	Richer	Improved source of drinking water	Unimproved
1064	Male	15-34 years	Secondary/SSS/SHS	Never married/never lived together	15-34 years	Central	Urban	Richer	Improved source of drinking water	Unimproved
1065	Male	15-34 years	Middle/JSS/JHS	Never married/never lived together	15-34 years	Central	Urban	Richest	Improved source of drinking water	Unimproved
1066	Male	15-34 years	Primary	Never married/never lived together	15-34 years	Central	Urban	Richer	Improved source of drinking water	Unimproved
1067	Male	15-34 years	Primary	Never married/never lived together	15-34 years	Upper East	Rural	Poorest	Improved source of drinking water	Unimproved
1068	Male	15-34 years	Secondary/SSS/SHS	Never married/never lived together	15-34 years	Ashanti	Urban	Richer	Improved source of drinking water	Unimproved
1069	Male	15-34 years	Middle/JSS/JHS	Never married/never lived together	15-34 years	Ashanti	Urban	Richer	Improved source of drinking water	Unimproved
1070	Male	15-34 years	Middle/JSS/JHS	Never married/never lived together	15-34 years	Western	Rural	Middle	Improved source of drinking water	Unimproved
1071	Male	15-34 years	Middle/JSS/JHS	Never married/never lived together	15-34 years	Western	Rural	Middle	Improved source of drinking water	Unimproved
1072	Male	15-34 years	Secondary/SSS/SHS	Never married/never lived together	15-34 years	Ashanti	Urban	Richest	Improved source of drinking water	Unimproved
1073	Male	15-34 years	Middle/JSS/JHS	Never married/never lived together	15-34 years	Ashanti	Urban	Richest	Improved source of drinking water	Unimproved
1074	Male	15-34 years	Secondary/SSS/SHS	Never married/never lived together	15-34 years	Ashanti	Urban	Richest	Improved source of drinking water	Unimproved
1075	Male	15-34 years	Middle/JSS/JHS	Never married/never lived together	15-34 years	Western	Rural	Richer	Improved source of drinking water	Unimproved
1076	Male	15-34 years	Secondary/SSS/SHS	Never married/never lived together	15-34 years	Western	Urban	Richest	Improved source of drinking water	Unimproved
1077	Male	15-34 years	Higher	Never married/never lived together	15-34 years	Eastern	Urban	Richer	Improved source of drinking water	Unimproved
1078	Male	15-34 years	Secondary/SSS/SHS	Never married/never lived together	15-34 years	Eastern	Urban	Richest	Improved source of drinking water	Unimproved
1079	Male	15-34 years	Middle/JSS/JHS	Never married/never lived together	15-34 years	Eastern	Urban	Richer	Improved source of drinking water	Unimproved
1080	Male	15-34 years	Secondary/SSS/SHS	Never married/never lived together	15-34 years	Eastern	Urban	Richest	Improved source of drinking water	Unimproved
1081	Male	15-34 years	Primary	Never married/never lived together	15-34 years	Greater Accra	Urban	Middle	Improved source of drinking water	Unimproved
1082	Male	15-34 years	Secondary/SSS/SHS	Never married/never lived together	15-34 years	Greater Accra	Urban	Middle	Improved source of drinking water	Unimproved
1083	Male	15-34 years	Middle/JSS/JHS	Never married/never lived together	15-34 years	Greater Accra	Urban	Middle	Improved source of drinking water	Unimproved
1084	Male	15-34 years	Secondary/SSS/SHS	Never married/never lived together	15-34 years	Greater Accra	Urban	Richer	Improved source of drinking water	Unimproved
1085	Male	15-34 years	Middle/JSS/JHS	Never married/never lived together	15-34 years	Greater Accra	Urban	Richer	Improved source of drinking water	Unimproved
1086	Male	15-34 years	Middle/JSS/JHS	Never married/never lived together	15-34 years	Ashanti	Urban	Richest	Improved source of drinking water	Unimproved
1087	Male	15-34 years	Higher	Never married/never lived together	15-34 years	Ashanti	Urban	Richest	Improved source of drinking water	Unimproved
1088	Male	15-34 years	Middle/JSS/JHS	Never married/never lived together	15-34 years	Ashanti	Urban	Richer	Improved source of drinking water	Improved
1089	Male	15-34 years	Middle/JSS/JHS	Never married/never lived together	15-34 years	Ashanti	Urban	Richest	Improved source of drinking water	Unimproved
1090	Male	15-34 years	Higher	Never married/never lived together	15-34 years	Ashanti	Urban	Richest	Improved source of drinking water	Improved
1091	Male	15-34 years	Middle/JSS/JHS	Never married/never lived together	15-34 years	Ashanti	Urban	Richest	Improved source of drinking water	Unimproved
1092	Male	15-34 years	Higher	Never married/never lived together	15-34 years	Ashanti	Urban	Richest	Improved source of drinking water	Improved
1093	Male	15-34 years	Middle/JSS/JHS	Never married/never lived together	15-34 years	Western	Urban	Richer	Improved source of drinking water	Unimproved
1094	Male	15-34 years	Secondary/SSS/SHS	Never married/never lived together	15-34 years	Western	Urban	Richer	Improved source of drinking water	Unimproved
1095	Male	15-34 years	Middle/JSS/JHS	Never married/never lived together	15-34 years	Western	Urban	Middle	Improved source of drinking water	Unimproved
1096	Male	15-34 years	Secondary/SSS/SHS	Never married/never lived together	15-34 years	Western	Urban	Richer	Improved source of drinking water	Unimproved
1097	Male	15-34 years	Primary	Never married/never lived together	15-34 years	Western	Urban	Richer	Improved source of drinking water	Unimproved
1098	Male	15-34 years	Higher	Never married/never lived together	15-34 years	Upper West	Rural	Richer	Improved source of drinking water	Unimproved
1099	Male	15-34 years	Higher	Never married/never lived together	15-34 years	Upper West	Rural	Richer	Improved source of drinking water	Unimproved
1100	Male	15-34 years	Higher	Never married/never lived together	15-34 years	Upper West	Rural	Middle	Unimproved source of drinking water	Unimproved
1101	Male	15-34 years	Secondary/SSS/SHS	Never married/never lived together	15-34 years	Upper West	Rural	Poorer	Improved source of drinking water	Unimproved
1102	Male	15-34 years	Secondary/SSS/SHS	Never married/never lived together	15-34 years	Upper West	Rural	Middle	Improved source of drinking water	Unimproved
1103	Male	15-34 years	Higher	Never married/never lived together	15-34 years	Upper West	Rural	Middle	Unimproved source of drinking water	Unimproved
1104	Male	15-34 years	Secondary/SSS/SHS	Never married/never lived together	15-34 years	Upper West	Rural	Poorer	Improved source of drinking water	Unimproved
1105	Male	15-34 years	Secondary/SSS/SHS	Never married/never lived together	15-34 years	Upper West	Rural	Richer	Improved source of drinking water	Unimproved
1106	Male	15-34 years	Secondary/SSS/SHS	Never married/never lived together	15-34 years	Upper West	Rural	Middle	Unimproved source of drinking water	Unimproved
1107	Male	15-34 years	Higher	Never married/never lived together	15-34 years	Upper West	Rural	Middle	Improved source of drinking water	Unimproved
1108	Male	15-34 years	Secondary/SSS/SHS	Never married/never lived together	15-34 years	Upper West	Rural	Middle	Unimproved source of drinking water	Unimproved
1109	Male	15-34 years	Higher	Never married/never lived together	15-34 years	Upper West	Rural	Richer	Improved source of drinking water	Unimproved
1110	Male	15-34 years	Secondary/SSS/SHS	Never married/never lived together	15-34 years	Upper West	Rural	Richer	Unimproved source of drinking water	Unimproved
1111	Male	15-34 years	Middle/JSS/JHS	Never married/never lived together	15-34 years	Upper West	Rural	Middle	Improved source of drinking water	Unimproved
1112	Male	15-34 years	Higher	Never married/never lived together	15-34 years	Upper West	Rural	Richer	Improved source of drinking water	Unimproved
1113	Male	15-34 years	Secondary/SSS/SHS	Never married/never lived together	15-34 years	Upper West	Rural	Richer	Improved source of drinking water	Unimproved
1114	Male	15-34 years	Higher	Never married/never lived together	15-34 years	Upper West	Rural	Middle	Improved source of drinking water	Unimproved
1115	Male	15-34 years	Higher	Never married/never lived together	15-34 years	Upper West	Rural	Richer	Improved source of drinking water	Unimproved
1116	Male	15-34 years	Middle/JSS/JHS	Never married/never lived together	15-34 years	Central	Rural	Middle	Improved source of drinking water	Unimproved
1117	Male	15-34 years	Secondary/SSS/SHS	Never married/never lived together	15-34 years	Central	Rural	Middle	Improved source of drinking water	Unimproved
1118	Male	15-34 years	Higher	Never married/never lived together	15-34 years	Volta	Urban	Richest	Improved source of drinking water	Unimproved
1119	Male	15-34 years	Secondary/SSS/SHS	Never married/never lived together	15-34 years	Volta	Urban	Richer	Improved source of drinking water	Unimproved
1120	Male	15-34 years	Secondary/SSS/SHS	Never married/never lived together	15-34 years	Volta	Urban	Richer	Improved source of drinking water	Unimproved
1121	Male	15-34 years	Middle/JSS/JHS	Never married/never lived together	15-34 years	Volta	Urban	Richer	Improved source of drinking water	Unimproved
1122	Male	15-34 years	Secondary/SSS/SHS	Never married/never lived together	15-34 years	Volta	Urban	Richer	Improved source of drinking water	Unimproved
1123	Male	15-34 years	Secondary/SSS/SHS	Never married/never lived together	15-34 years	Volta	Urban	Middle	Improved source of drinking water	Unimproved
1124	Male	15-34 years	Primary	Never married/never lived together	15-34 years	Greater Accra	Urban	Richer	Improved source of drinking water	Unimproved
1125	Male	15-34 years	Middle/JSS/JHS	Never married/never lived together	15-34 years	Eastern	Urban	Richer	Improved source of drinking water	Unimproved
1126	Male	15-34 years	Secondary/SSS/SHS	Never married/never lived together	15-34 years	Eastern	Urban	Richer	Improved source of drinking water	Unimproved
1127	Male	15-34 years	Secondary/SSS/SHS	Never married/never lived together	15-34 years	Eastern	Urban	Richer	Improved source of drinking water	Unimproved
1128	Male	15-34 years	Middle/JSS/JHS	Never married/never lived together	15-34 years	Upper West	Urban	Richer	Improved source of drinking water	Unimproved
1129	Male	15-34 years	Middle/JSS/JHS	Never married/never lived together	15-34 years	Upper West	Urban	Richer	Improved source of drinking water	Unimproved
1130	Male	15-34 years	Higher	Never married/never lived together	15-34 years	Upper West	Urban	Richest	Improved source of drinking water	Unimproved
1131	Male	15-34 years	Secondary/SSS/SHS	Never married/never lived together	15-34 years	Upper West	Urban	Middle	Improved source of drinking water	Unimproved
1132	Male	15-34 years	Primary	Never married/never lived together	15-34 years	Ashanti	Rural	Middle	Improved source of drinking water	Unimproved
1133	Male	15-34 years	Primary	Never married/never lived together	15-34 years	Ashanti	Rural	Middle	Improved source of drinking water	Unimproved
1134	Male	15-34 years	Middle/JSS/JHS	Never married/never lived together	15-34 years	Ashanti	Rural	Middle	Improved source of drinking water	Unimproved
1135	Male	15-34 years	Secondary/SSS/SHS	Never married/never lived together	15-34 years	Central	Urban	Richer	Improved source of drinking water	Unimproved
1136	Male	15-34 years	Higher	Never married/never lived together	15-34 years	Central	Urban	Richest	Improved source of drinking water	Unimproved
1137	Male	15-34 years	Secondary/SSS/SHS	Never married/never lived together	15-34 years	Central	Urban	Richer	Improved source of drinking water	Improved
1138	Male	15-34 years	Higher	Never married/never lived together	15-34 years	Central	Urban	Richest	Improved source of drinking water	Unimproved
1139	Male	15-34 years	Middle/JSS/JHS	Never married/never lived together	15-34 years	Central	Urban	Richer	Improved source of drinking water	Unimproved
1140	Male	15-34 years	No education/preschool	Never married/never lived together	15-34 years	Northern	Rural	Poorest	Unimproved source of drinking water	Unimproved
1141	Male	15-34 years	Primary	Never married/never lived together	15-34 years	Northern	Rural	Poorest	Unimproved source of drinking water	Unimproved
1142	Male	15-34 years	No education/preschool	Never married/never lived together	15-34 years	Northern	Rural	Poorest	Unimproved source of drinking water	Unimproved
1143	Male	15-34 years	No education/preschool	Never married/never lived together	15-34 years	Northern	Rural	Poorest	Unimproved source of drinking water	Unimproved
1144	Male	15-34 years	Secondary/SSS/SHS	Never married/never lived together	15-34 years	Ashanti	Rural	Richer	Improved source of drinking water	Improved
1145	Male	15-34 years	Secondary/SSS/SHS	Never married/never lived together	15-34 years	Ashanti	Rural	Middle	Improved source of drinking water	Unimproved
1146	Male	15-34 years	Higher	Never married/never lived together	15-34 years	Eastern	Urban	Richest	Improved source of drinking water	Improved
1147	Male	15-34 years	Higher	Never married/never lived together	15-34 years	Eastern	Urban	Richest	Improved source of drinking water	Unimproved
1148	Male	15-34 years	Higher	Never married/never lived together	15-34 years	Eastern	Urban	Richest	Improved source of drinking water	Improved
1149	Male	15-34 years	No education/preschool	Never married/never lived together	15-34 years	Upper East	Urban	Poorest	Improved source of drinking water	Unimproved
1150	Male	15-34 years	No education/preschool	Never married/never lived together	15-34 years	Upper East	Urban	Poorest	Unimproved source of drinking water	Unimproved
1151	Male	15-34 years	Secondary/SSS/SHS	Never married/never lived together	15-34 years	Central	Rural	Richer	Improved source of drinking water	Unimproved
1152	Male	15-34 years	Middle/JSS/JHS	Never married/never lived together	15-34 years	Central	Rural	Poorer	Improved source of drinking water	Unimproved
1153	Male	15-34 years	Middle/JSS/JHS	Never married/never lived together	15-34 years	Greater Accra	Urban	Richer	Improved source of drinking water	Unimproved
1154	Male	15-34 years	Secondary/SSS/SHS	Never married/never lived together	15-34 years	Greater Accra	Urban	Richest	Improved source of drinking water	Unimproved
1155	Male	15-34 years	Secondary/SSS/SHS	Never married/never lived together	15-34 years	Greater Accra	Urban	Richest	Improved source of drinking water	Unimproved
1156	Male	15-34 years	Higher	Never married/never lived together	15-34 years	Greater Accra	Urban	Richest	Improved source of drinking water	Unimproved
1157	Male	15-34 years	Middle/JSS/JHS	Never married/never lived together	15-34 years	Ashanti	Urban	Richest	Improved source of drinking water	Improved
1158	Male	15-34 years	Secondary/SSS/SHS	Never married/never lived together	15-34 years	Upper West	Urban	Middle	Improved source of drinking water	Unimproved
1159	Male	15-34 years	Middle/JSS/JHS	Never married/never lived together	15-34 years	Upper West	Urban	Middle	Improved source of drinking water	Unimproved
1160	Male	15-34 years	Higher	Never married/never lived together	15-34 years	Upper West	Urban	Richer	Improved source of drinking water	Unimproved
1161	Male	15-34 years	Secondary/SSS/SHS	Never married/never lived together	15-34 years	Upper West	Urban	Middle	Improved source of drinking water	Unimproved
1162	Male	15-34 years	Secondary/SSS/SHS	Never married/never lived together	15-34 years	Upper West	Urban	Poorer	Improved source of drinking water	Unimproved
1163	Male	15-34 years	No education/preschool	Never married/never lived together	15-34 years	Ashanti	Rural	Middle	Improved source of drinking water	Unimproved
1164	Male	15-34 years	Primary	Never married/never lived together	15-34 years	Ashanti	Rural	Poorest	Unimproved source of drinking water	Unimproved
1165	Male	15-34 years	No education/preschool	Never married/never lived together	15-34 years	Ashanti	Rural	Middle	Improved source of drinking water	Unimproved
1166	Male	15-34 years	Primary	Never married/never lived together	15-34 years	Ashanti	Rural	Poorer	Improved source of drinking water	Unimproved
1167	Male	15-34 years	Middle/JSS/JHS	Never married/never lived together	15-34 years	Eastern	Rural	Middle	Improved source of drinking water	Unimproved
1168	Male	15-34 years	Secondary/SSS/SHS	Never married/never lived together	15-34 years	Eastern	Rural	Middle	Improved source of drinking water	Unimproved
1169	Male	15-34 years	Secondary/SSS/SHS	Never married/never lived together	15-34 years	Ashanti	Rural	Richer	Improved source of drinking water	Unimproved
1170	Male	15-34 years	Secondary/SSS/SHS	Never married/never lived together	15-34 years	Ashanti	Rural	Middle	Improved source of drinking water	Unimproved
1171	Male	15-34 years	Secondary/SSS/SHS	Never married/never lived together	15-34 years	Ashanti	Rural	Middle	Improved source of drinking water	Unimproved
1172	Male	15-34 years	Secondary/SSS/SHS	Never married/never lived together	15-34 years	Eastern	Urban	Middle	Improved source of drinking water	Unimproved
1173	Male	15-34 years	Higher	Never married/never lived together	15-34 years	Eastern	Urban	Richest	Improved source of drinking water	Unimproved
1174	Male	15-34 years	Secondary/SSS/SHS	Never married/never lived together	15-34 years	Eastern	Urban	Richer	Improved source of drinking water	Unimproved
1175	Male	15-34 years	Secondary/SSS/SHS	Never married/never lived together	15-34 years	Eastern	Urban	Richer	Improved source of drinking water	Unimproved
1176	Male	15-34 years	Middle/JSS/JHS	Never married/never lived together	15-34 years	Eastern	Urban	Middle	Improved source of drinking water	Unimproved
1177	Male	15-34 years	Primary	Never married/never lived together	15-34 years	Volta	Rural	Poorest	Improved source of drinking water	Unimproved
1178	Male	15-34 years	Middle/JSS/JHS	Never married/never lived together	15-34 years	Volta	Rural	Poorer	Improved source of drinking water	Unimproved
1179	Male	15-34 years	Middle/JSS/JHS	Never married/never lived together	15-34 years	Volta	Rural	Middle	Improved source of drinking water	Unimproved
1180	Male	15-34 years	Middle/JSS/JHS	Never married/never lived together	15-34 years	Greater Accra	Urban	Richest	Improved source of drinking water	Unimproved
1181	Male	15-34 years	Higher	Never married/never lived together	15-34 years	Greater Accra	Urban	Richest	Improved source of drinking water	Unimproved
1182	Male	15-34 years	Secondary/SSS/SHS	Never married/never lived together	15-34 years	Greater Accra	Urban	Richer	Improved source of drinking water	Unimproved
1183	Male	15-34 years	Secondary/SSS/SHS	Never married/never lived together	15-34 years	Greater Accra	Urban	Richest	Improved source of drinking water	Unimproved
1184	Male	15-34 years	Higher	Never married/never lived together	15-34 years	Greater Accra	Urban	Richest	Improved source of drinking water	Unimproved
1185	Male	15-34 years	Middle/JSS/JHS	Never married/never lived together	15-34 years	Greater Accra	Urban	Richest	Improved source of drinking water	Unimproved
1186	Male	15-34 years	Primary	Never married/never lived together	15-34 years	Western	Rural	Poorer	Improved source of drinking water	Unimproved
1187	Male	15-34 years	No education/preschool	Never married/never lived together	15-34 years	Western	Rural	Poorer	Improved source of drinking water	Unimproved
1188	Male	15-34 years	Higher	Never married/never lived together	15-34 years	Greater Accra	Urban	Richest	Improved source of drinking water	Improved
1189	Male	15-34 years	Higher	Never married/never lived together	15-34 years	Greater Accra	Urban	Richest	Improved source of drinking water	Unimproved
1190	Male	15-34 years	Middle/JSS/JHS	Never married/never lived together	15-34 years	Greater Accra	Urban	Middle	Improved source of drinking water	Unimproved
1191	Male	15-34 years	Higher	Never married/never lived together	15-34 years	Greater Accra	Urban	Richest	Improved source of drinking water	Improved
1192	Male	15-34 years	Middle/JSS/JHS	Never married/never lived together	15-34 years	Northern	Rural	Middle	Improved source of drinking water	Unimproved
1193	Male	15-34 years	Primary	Never married/never lived together	15-34 years	Northern	Rural	Poorer	Improved source of drinking water	Unimproved
1194	Male	15-34 years	Higher	Never married/never lived together	15-34 years	Northern	Rural	Richest	Improved source of drinking water	Unimproved
1195	Male	15-34 years	Primary	Never married/never lived together	15-34 years	Western	Rural	Middle	Improved source of drinking water	Unimproved
1196	Male	15-34 years	Middle/JSS/JHS	Never married/never lived together	15-34 years	Western	Rural	Poorer	Unimproved source of drinking water	Unimproved
1197	Male	15-34 years	Secondary/SSS/SHS	Never married/never lived together	15-34 years	Western	Rural	Middle	Improved source of drinking water	Unimproved
1198	Male	15-34 years	Primary	Never married/never lived together	15-34 years	Western	Rural	Middle	Unimproved source of drinking water	Unimproved
1199	Male	15-34 years	Secondary/SSS/SHS	Never married/never lived together	15-34 years	Western	Rural	Richer	Improved source of drinking water	Unimproved
1200	Male	15-34 years	Middle/JSS/JHS	Never married/never lived together	15-34 years	Central	Urban	Richer	Improved source of drinking water	Unimproved
1201	Male	15-34 years	Middle/JSS/JHS	Never married/never lived together	15-34 years	Central	Urban	Richer	Improved source of drinking water	Unimproved
1202	Male	15-34 years	Secondary/SSS/SHS	Never married/never lived together	15-34 years	Central	Urban	Richest	Improved source of drinking water	Unimproved
1203	Male	15-34 years	Secondary/SSS/SHS	Never married/never lived together	15-34 years	Central	Urban	Richest	Improved source of drinking water	Unimproved
1204	Male	15-34 years	Primary	Never married/never lived together	15-34 years	Volta	Rural	Poorer	Unimproved source of drinking water	Unimproved
1205	Male	15-34 years	Middle/JSS/JHS	Never married/never lived together	15-34 years	Central	Urban	Richer	Improved source of drinking water	Unimproved
1206	Male	15-34 years	Higher	Never married/never lived together	15-34 years	Central	Urban	Richest	Improved source of drinking water	Unimproved
1207	Male	15-34 years	Secondary/SSS/SHS	Never married/never lived together	15-34 years	Western	Rural	Poorer	Unimproved source of drinking water	Unimproved
1208	Male	15-34 years	No education/preschool	Never married/never lived together	15-34 years	Western	Rural	Poorest	Improved source of drinking water	Unimproved
1209	Male	15-34 years	Secondary/SSS/SHS	Never married/never lived together	15-34 years	Western	Rural	Poorer	Unimproved source of drinking water	Unimproved
1210	Male	15-34 years	No education/preschool	Never married/never lived together	15-34 years	Upper West	Rural	Poorer	Improved source of drinking water	Unimproved
1211	Male	15-34 years	Secondary/SSS/SHS	Never married/never lived together	15-34 years	Western	Rural	Poorer	Improved source of drinking water	Unimproved
1212	Male	15-34 years	Higher	Never married/never lived together	15-34 years	Upper East	Urban	Middle	Improved source of drinking water	Unimproved
1213	Male	15-34 years	Middle/JSS/JHS	Never married/never lived together	15-34 years	Volta	Urban	Middle	Improved source of drinking water	Unimproved
1214	Male	15-34 years	Middle/JSS/JHS	Never married/never lived together	15-34 years	Volta	Urban	Poorer	Improved source of drinking water	Unimproved
1215	Male	15-34 years	Higher	Never married/never lived together	15-34 years	Ashanti	Urban	Richer	Improved source of drinking water	Unimproved
1216	Male	15-34 years	Secondary/SSS/SHS	Never married/never lived together	15-34 years	Ashanti	Urban	Middle	Unimproved source of drinking water	Unimproved
1217	Male	15-34 years	Secondary/SSS/SHS	Never married/never lived together	15-34 years	Ashanti	Urban	Richer	Unimproved source of drinking water	Improved
1218	Male	15-34 years	Primary	Never married/never lived together	15-34 years	Volta	Urban	Middle	Improved source of drinking water	Unimproved
1219	Male	15-34 years	No education/preschool	Never married/never lived together	15-34 years	Volta	Urban	Middle	Improved source of drinking water	Unimproved
1220	Male	15-34 years	Primary	Never married/never lived together	15-34 years	Eastern	Urban	Middle	Improved source of drinking water	Unimproved
1221	Male	15-34 years	Primary	Never married/never lived together	15-34 years	Eastern	Urban	Middle	Improved source of drinking water	Unimproved
1222	Male	15-34 years	Primary	Never married/never lived together	15-34 years	Eastern	Urban	Poorer	Improved source of drinking water	Unimproved
1223	Male	15-34 years	Secondary/SSS/SHS	Never married/never lived together	15-34 years	Upper West	Rural	Poorest	Improved source of drinking water	Unimproved
1224	Male	15-34 years	Middle/JSS/JHS	Never married/never lived together	15-34 years	Upper West	Rural	Poorest	Improved source of drinking water	Unimproved
1225	Male	15-34 years	Primary	Never married/never lived together	15-34 years	Upper West	Rural	Poorer	Improved source of drinking water	Unimproved
1226	Male	15-34 years	Primary	Never married/never lived together	15-34 years	Upper West	Rural	Poorest	Improved source of drinking water	Unimproved
1227	Male	15-34 years	No education/preschool	Never married/never lived together	15-34 years	Upper West	Rural	Poorest	Improved source of drinking water	Unimproved
1228	Male	15-34 years	Higher	Never married/never lived together	15-34 years	Western	Urban	Richest	Improved source of drinking water	Unimproved
1229	Male	15-34 years	Higher	Never married/never lived together	15-34 years	Western	Urban	Richest	Improved source of drinking water	Unimproved
1230	Male	15-34 years	Higher	Never married/never lived together	15-34 years	Western	Urban	Richer	Improved source of drinking water	Unimproved
1231	Male	15-34 years	Secondary/SSS/SHS	Never married/never lived together	15-34 years	Western	Rural	Richer	Improved source of drinking water	Unimproved
1232	Male	15-34 years	Secondary/SSS/SHS	Never married/never lived together	15-34 years	Western	Rural	Middle	Improved source of drinking water	Unimproved
1233	Male	15-34 years	Secondary/SSS/SHS	Never married/never lived together	15-34 years	Western	Rural	Richer	Improved source of drinking water	Unimproved
1234	Male	15-34 years	Primary	Never married/never lived together	15-34 years	Western	Rural	Middle	Improved source of drinking water	Unimproved
1235	Male	15-34 years	Secondary/SSS/SHS	Never married/never lived together	15-34 years	Western	Rural	Middle	Improved source of drinking water	Unimproved
1236	Male	15-34 years	Secondary/SSS/SHS	Never married/never lived together	15-34 years	Western	Rural	Middle	Improved source of drinking water	Unimproved
1237	Male	15-34 years	Secondary/SSS/SHS	Never married/never lived together	15-34 years	Eastern	Rural	Middle	Improved source of drinking water	Unimproved
1238	Male	15-34 years	Middle/JSS/JHS	Never married/never lived together	15-34 years	Eastern	Rural	Middle	Improved source of drinking water	Unimproved
1239	Male	15-34 years	Middle/JSS/JHS	Never married/never lived together	15-34 years	Central	Rural	Richer	Improved source of drinking water	Unimproved
1240	Male	15-34 years	Middle/JSS/JHS	Never married/never lived together	15-34 years	Central	Rural	Richest	Improved source of drinking water	Unimproved
1241	Male	15-34 years	Primary	Never married/never lived together	15-34 years	Central	Rural	Middle	Improved source of drinking water	Unimproved
1242	Male	15-34 years	Middle/JSS/JHS	Never married/never lived together	15-34 years	Central	Rural	Richer	Improved source of drinking water	Unimproved
1243	Male	15-34 years	Middle/JSS/JHS	Never married/never lived together	15-34 years	Central	Rural	Middle	Improved source of drinking water	Unimproved
1244	Male	15-34 years	Middle/JSS/JHS	Never married/never lived together	15-34 years	Central	Rural	Richer	Improved source of drinking water	Unimproved
1245	Male	15-34 years	Higher	Never married/never lived together	15-34 years	Upper West	Urban	Richest	Improved source of drinking water	Unimproved
1246	Male	15-34 years	Higher	Never married/never lived together	15-34 years	Upper West	Urban	Richest	Improved source of drinking water	Improved
1247	Male	15-34 years	Middle/JSS/JHS	Never married/never lived together	15-34 years	Upper West	Urban	Middle	Improved source of drinking water	Unimproved
1248	Male	15-34 years	Higher	Never married/never lived together	15-34 years	Upper West	Urban	Richest	Improved source of drinking water	Unimproved
1249	Male	15-34 years	Higher	Never married/never lived together	15-34 years	Upper West	Urban	Richest	Improved source of drinking water	Unimproved
1250	Male	15-34 years	Higher	Never married/never lived together	15-34 years	Upper West	Urban	Middle	Improved source of drinking water	Unimproved
1251	Male	15-34 years	Higher	Never married/never lived together	15-34 years	Volta	Rural	Poorer	Improved source of drinking water	Improved
1252	Male	15-34 years	Higher	Never married/never lived together	15-34 years	Northern	Urban	Middle	Improved source of drinking water	Unimproved
1253	Male	15-34 years	Middle/JSS/JHS	Never married/never lived together	15-34 years	Northern	Urban	Middle	Improved source of drinking water	Unimproved
1254	Male	15-34 years	Higher	Never married/never lived together	15-34 years	Northern	Urban	Middle	Improved source of drinking water	Unimproved
1255	Male	15-34 years	No education/preschool	Never married/never lived together	15-34 years	Northern	Urban	Poorer	Improved source of drinking water	Unimproved
1256	Male	15-34 years	Secondary/SSS/SHS	Never married/never lived together	15-34 years	Northern	Urban	Poorest	Improved source of drinking water	Unimproved
1257	Male	15-34 years	Middle/JSS/JHS	Never married/never lived together	15-34 years	Central	Rural	Middle	Improved source of drinking water	Unimproved
1258	Male	15-34 years	Middle/JSS/JHS	Never married/never lived together	15-34 years	Central	Rural	Middle	Improved source of drinking water	Unimproved
1259	Male	15-34 years	Middle/JSS/JHS	Never married/never lived together	15-34 years	Central	Rural	Middle	Improved source of drinking water	Unimproved
1260	Male	15-34 years	Primary	Never married/never lived together	15-34 years	Central	Rural	Poorer	Improved source of drinking water	Unimproved
1261	Male	15-34 years	Primary	Never married/never lived together	15-34 years	Western	Rural	Poorest	Unimproved source of drinking water	Unimproved
1262	Male	15-34 years	Secondary/SSS/SHS	Never married/never lived together	15-34 years	Upper East	Urban	Richest	Improved source of drinking water	Unimproved
1263	Male	15-34 years	Middle/JSS/JHS	Never married/never lived together	15-34 years	Upper East	Urban	Middle	Improved source of drinking water	Unimproved
1264	Male	15-34 years	Middle/JSS/JHS	Never married/never lived together	15-34 years	Ashanti	Urban	Richest	Improved source of drinking water	Unimproved
1265	Male	15-34 years	Middle/JSS/JHS	Never married/never lived together	15-34 years	Central	Urban	Richer	Improved source of drinking water	Unimproved
1266	Male	15-34 years	Middle/JSS/JHS	Never married/never lived together	15-34 years	Ashanti	Urban	Richer	Improved source of drinking water	Unimproved
1267	Male	15-34 years	Secondary/SSS/SHS	Never married/never lived together	15-34 years	Ashanti	Urban	Richer	Improved source of drinking water	Unimproved
1268	Male	15-34 years	Secondary/SSS/SHS	Never married/never lived together	15-34 years	Ashanti	Urban	Richer	Improved source of drinking water	Unimproved
1269	Male	15-34 years	Middle/JSS/JHS	Never married/never lived together	15-34 years	Ashanti	Urban	Richer	Improved source of drinking water	Unimproved
1270	Male	15-34 years	Higher	Never married/never lived together	15-34 years	Central	Rural	Middle	Improved source of drinking water	Unimproved
1271	Male	15-34 years	Middle/JSS/JHS	Never married/never lived together	15-34 years	Northern	Urban	Middle	Improved source of drinking water	Unimproved
1272	Male	15-34 years	Secondary/SSS/SHS	Never married/never lived together	15-34 years	Volta	Urban	Poorer	Improved source of drinking water	Unimproved
1273	Male	15-34 years	Higher	Never married/never lived together	15-34 years	Volta	Urban	Richer	Improved source of drinking water	Improved
1274	Male	15-34 years	Middle/JSS/JHS	Never married/never lived together	15-34 years	Western	Urban	Richest	Improved source of drinking water	Unimproved
1275	Male	15-34 years	Secondary/SSS/SHS	Never married/never lived together	15-34 years	Greater Accra	Urban	Richest	Improved source of drinking water	Unimproved
1276	Male	15-34 years	Higher	Never married/never lived together	15-34 years	Greater Accra	Urban	Richest	Improved source of drinking water	Unimproved
1277	Male	15-34 years	Secondary/SSS/SHS	Never married/never lived together	15-34 years	Greater Accra	Urban	Richest	Improved source of drinking water	Unimproved
1278	Male	15-34 years	Primary	Never married/never lived together	15-34 years	Greater Accra	Urban	Middle	Improved source of drinking water	Unimproved
1279	Male	15-34 years	Middle/JSS/JHS	Never married/never lived together	15-34 years	Volta	Rural	Poorer	Improved source of drinking water	Unimproved
1280	Male	15-34 years	Middle/JSS/JHS	Never married/never lived together	15-34 years	Volta	Rural	Poorer	Improved source of drinking water	Unimproved
1281	Male	15-34 years	Middle/JSS/JHS	Never married/never lived together	15-34 years	Volta	Rural	Middle	Improved source of drinking water	Unimproved
1282	Male	15-34 years	Secondary/SSS/SHS	Never married/never lived together	15-34 years	Volta	Rural	Middle	Improved source of drinking water	Unimproved
1283	Male	15-34 years	Secondary/SSS/SHS	Never married/never lived together	15-34 years	Upper East	Urban	Richest	Improved source of drinking water	Unimproved
1284	Male	15-34 years	Higher	Never married/never lived together	15-34 years	Upper East	Urban	Poorer	Improved source of drinking water	Unimproved
1285	Male	15-34 years	Higher	Never married/never lived together	15-34 years	Upper East	Urban	Richest	Improved source of drinking water	Unimproved
1286	Male	15-34 years	Higher	Never married/never lived together	15-34 years	Upper East	Urban	Richest	Improved source of drinking water	Unimproved
1287	Male	15-34 years	No education/preschool	Never married/never lived together	15-34 years	Northern	Rural	Poorest	Improved source of drinking water	Unimproved
1288	Male	15-34 years	Primary	Never married/never lived together	15-34 years	Brong Ahafo	Rural	Poorest	Improved source of drinking water	Unimproved
1289	Male	15-34 years	No education/preschool	Never married/never lived together	15-34 years	Brong Ahafo	Rural	Poorest	Unimproved source of drinking water	Unimproved
1290	Male	15-34 years	Higher	Never married/never lived together	15-34 years	Central	Urban	Richest	Improved source of drinking water	Unimproved
1291	Male	15-34 years	Higher	Never married/never lived together	15-34 years	Central	Urban	Richest	Improved source of drinking water	Unimproved
1292	Male	15-34 years	Secondary/SSS/SHS	Never married/never lived together	15-34 years	Central	Urban	Richer	Improved source of drinking water	Unimproved
1293	Male	15-34 years	Higher	Never married/never lived together	15-34 years	Central	Urban	Richest	Improved source of drinking water	Unimproved
1294	Male	15-34 years	Higher	Never married/never lived together	15-34 years	Central	Urban	Richest	Improved source of drinking water	Unimproved
1295	Male	15-34 years	Secondary/SSS/SHS	Never married/never lived together	15-34 years	Central	Urban	Richer	Improved source of drinking water	Unimproved
1296	Male	15-34 years	Secondary/SSS/SHS	Never married/never lived together	15-34 years	Upper East	Rural	Poorest	Improved source of drinking water	Unimproved
1297	Male	15-34 years	Primary	Never married/never lived together	15-34 years	Upper East	Rural	Poorer	Improved source of drinking water	Unimproved
1298	Male	15-34 years	Primary	Never married/never lived together	15-34 years	Upper East	Rural	Poorest	Improved source of drinking water	Unimproved
1299	Male	15-34 years	Secondary/SSS/SHS	Never married/never lived together	15-34 years	Upper East	Rural	Poorest	Improved source of drinking water	Unimproved
1300	Male	15-34 years	Secondary/SSS/SHS	Never married/never lived together	15-34 years	Volta	Rural	Middle	Improved source of drinking water	Unimproved
1301	Male	15-34 years	Middle/JSS/JHS	Never married/never lived together	15-34 years	Volta	Rural	Middle	Improved source of drinking water	Unimproved
1302	Male	15-34 years	Higher	Never married/never lived together	15-34 years	Volta	Rural	Richer	Improved source of drinking water	Unimproved
1303	Male	15-34 years	Primary	Never married/never lived together	15-34 years	Volta	Rural	Poorer	Improved source of drinking water	Unimproved
1304	Male	15-34 years	Primary	Never married/never lived together	15-34 years	Volta	Rural	Poorer	Improved source of drinking water	Unimproved
1305	Male	15-34 years	Middle/JSS/JHS	Never married/never lived together	15-34 years	Greater Accra	Urban	Richest	Improved source of drinking water	Unimproved
1306	Male	15-34 years	Higher	Never married/never lived together	15-34 years	Greater Accra	Urban	Richest	Improved source of drinking water	Improved
1307	Male	15-34 years	Higher	Never married/never lived together	15-34 years	Greater Accra	Urban	Richest	Improved source of drinking water	Unimproved
1308	Male	15-34 years	Higher	Never married/never lived together	15-34 years	Volta	Rural	Richer	Improved source of drinking water	Unimproved
1309	Male	15-34 years	Higher	Never married/never lived together	15-34 years	Volta	Rural	Richer	Improved source of drinking water	Unimproved
1310	Male	15-34 years	Secondary/SSS/SHS	Never married/never lived together	15-34 years	Brong Ahafo	Urban	Middle	Improved source of drinking water	Unimproved
1311	Male	15-34 years	Higher	Never married/never lived together	15-34 years	Brong Ahafo	Urban	Richest	Improved source of drinking water	Unimproved
1312	Male	15-34 years	Higher	Never married/never lived together	15-34 years	Brong Ahafo	Urban	Richest	Improved source of drinking water	Unimproved
1313	Male	15-34 years	Secondary/SSS/SHS	Never married/never lived together	15-34 years	Brong Ahafo	Urban	Richer	Improved source of drinking water	Improved
1314	Male	15-34 years	Secondary/SSS/SHS	Never married/never lived together	15-34 years	Brong Ahafo	Urban	Richest	Improved source of drinking water	Unimproved
1315	Male	15-34 years	Middle/JSS/JHS	Never married/never lived together	15-34 years	Brong Ahafo	Urban	Richest	Improved source of drinking water	Unimproved
1316	Male	15-34 years	Primary	Never married/never lived together	15-34 years	Greater Accra	Urban	Middle	Improved source of drinking water	Unimproved
1317	Male	15-34 years	Secondary/SSS/SHS	Never married/never lived together	15-34 years	Greater Accra	Urban	Richest	Improved source of drinking water	Unimproved
1318	Male	15-34 years	Secondary/SSS/SHS	Never married/never lived together	15-34 years	Greater Accra	Urban	Richest	Improved source of drinking water	Improved
1319	Male	15-34 years	Secondary/SSS/SHS	Never married/never lived together	15-34 years	Greater Accra	Urban	Richest	Improved source of drinking water	Improved
1320	Male	15-34 years	Primary	Never married/never lived together	15-34 years	Greater Accra	Urban	Middle	Improved source of drinking water	Unimproved
1321	Male	15-34 years	Secondary/SSS/SHS	Never married/never lived together	15-34 years	Greater Accra	Urban	Richest	Improved source of drinking water	Unimproved
1322	Male	15-34 years	Secondary/SSS/SHS	Never married/never lived together	15-34 years	Greater Accra	Urban	Richest	Improved source of drinking water	Improved
1323	Male	15-34 years	Secondary/SSS/SHS	Never married/never lived together	15-34 years	Western	Urban	Middle	Improved source of drinking water	Unimproved
1324	Male	15-34 years	No education/preschool	Never married/never lived together	15-34 years	Eastern	Rural	Poorer	Improved source of drinking water	Unimproved
1325	Male	15-34 years	Middle/JSS/JHS	Never married/never lived together	15-34 years	Eastern	Rural	Middle	Improved source of drinking water	Unimproved
1326	Male	15-34 years	Secondary/SSS/SHS	Never married/never lived together	15-34 years	Volta	Urban	Middle	Improved source of drinking water	Unimproved
1327	Male	15-34 years	Middle/JSS/JHS	Never married/never lived together	15-34 years	Volta	Urban	Middle	Improved source of drinking water	Unimproved
1328	Male	15-34 years	Primary	Never married/never lived together	15-34 years	Volta	Urban	Richer	Improved source of drinking water	Unimproved
1329	Male	15-34 years	Secondary/SSS/SHS	Never married/never lived together	15-34 years	Volta	Urban	Poorer	Improved source of drinking water	Unimproved
1330	Male	15-34 years	Middle/JSS/JHS	Never married/never lived together	15-34 years	Eastern	Urban	Richest	Improved source of drinking water	Unimproved
1331	Male	15-34 years	Higher	Never married/never lived together	15-34 years	Eastern	Urban	Richest	Improved source of drinking water	Unimproved
1332	Male	15-34 years	Middle/JSS/JHS	Never married/never lived together	15-34 years	Upper West	Rural	Poorest	Improved source of drinking water	Unimproved
1333	Male	15-34 years	Middle/JSS/JHS	Never married/never lived together	15-34 years	Upper West	Rural	Poorest	Improved source of drinking water	Unimproved
1334	Male	15-34 years	Middle/JSS/JHS	Never married/never lived together	15-34 years	Greater Accra	Urban	Richer	Improved source of drinking water	Unimproved
1335	Male	15-34 years	Primary	Never married/never lived together	15-34 years	Brong Ahafo	Rural	Poorer	Unimproved source of drinking water	Unimproved
1336	Male	15-34 years	Higher	Never married/never lived together	15-34 years	Volta	Rural	Richer	Improved source of drinking water	Unimproved
1337	Male	15-34 years	Secondary/SSS/SHS	Never married/never lived together	15-34 years	Greater Accra	Urban	Richer	Improved source of drinking water	Unimproved
1338	Male	15-34 years	Middle/JSS/JHS	Never married/never lived together	15-34 years	Greater Accra	Urban	Richest	Improved source of drinking water	Unimproved
1339	Male	15-34 years	Secondary/SSS/SHS	Never married/never lived together	15-34 years	Western	Rural	Middle	Improved source of drinking water	Unimproved
1340	Male	15-34 years	Secondary/SSS/SHS	Never married/never lived together	15-34 years	Western	Rural	Middle	Improved source of drinking water	Improved
1341	Male	15-34 years	Secondary/SSS/SHS	Never married/never lived together	15-34 years	Western	Rural	Richer	Improved source of drinking water	Unimproved
1342	Male	15-34 years	Higher	Never married/never lived together	15-34 years	Upper West	Rural	Middle	Improved source of drinking water	Unimproved
1343	Male	15-34 years	Higher	Never married/never lived together	15-34 years	Central	Urban	Richest	Improved source of drinking water	Unimproved
1344	Male	15-34 years	Middle/JSS/JHS	Never married/never lived together	15-34 years	Upper West	Rural	Poorest	Improved source of drinking water	Unimproved
1345	Male	15-34 years	Higher	Never married/never lived together	15-34 years	Eastern	Urban	Richest	Improved source of drinking water	Unimproved
1346	Male	15-34 years	Higher	Never married/never lived together	15-34 years	Eastern	Urban	Richest	Improved source of drinking water	Unimproved
1347	Male	15-34 years	Higher	Never married/never lived together	15-34 years	Eastern	Urban	Richer	Improved source of drinking water	Unimproved
1348	Male	15-34 years	Higher	Never married/never lived together	15-34 years	Eastern	Urban	Richest	Improved source of drinking water	Improved
1349	Male	15-34 years	Secondary/SSS/SHS	Never married/never lived together	15-34 years	Eastern	Urban	Richer	Improved source of drinking water	Improved
1350	Male	15-34 years	Secondary/SSS/SHS	Never married/never lived together	15-34 years	Eastern	Urban	Richer	Improved source of drinking water	Unimproved
1351	Male	15-34 years	Middle/JSS/JHS	Never married/never lived together	15-34 years	Central	Rural	Richer	Improved source of drinking water	Unimproved
1352	Male	15-34 years	Middle/JSS/JHS	Never married/never lived together	15-34 years	Upper West	Rural	Poorer	Improved source of drinking water	Unimproved
1353	Male	15-34 years	Higher	Never married/never lived together	15-34 years	Ashanti	Rural	Richest	Improved source of drinking water	Improved
1354	Male	15-34 years	Middle/JSS/JHS	Never married/never lived together	15-34 years	Ashanti	Rural	Middle	Improved source of drinking water	Unimproved
1355	Male	15-34 years	Middle/JSS/JHS	Never married/never lived together	15-34 years	Volta	Rural	Poorest	Improved source of drinking water	Unimproved
1356	Male	15-34 years	Secondary/SSS/SHS	Never married/never lived together	15-34 years	Greater Accra	Urban	Richest	Improved source of drinking water	Unimproved
1357	Male	15-34 years	Middle/JSS/JHS	Never married/never lived together	15-34 years	Upper East	Rural	Poorer	Improved source of drinking water	Unimproved
1358	Male	15-34 years	Primary	Never married/never lived together	15-34 years	Ashanti	Urban	Richest	Improved source of drinking water	Improved
1359	Male	15-34 years	Secondary/SSS/SHS	Never married/never lived together	15-34 years	Ashanti	Urban	Richest	Improved source of drinking water	Unimproved
1360	Male	15-34 years	No education/preschool	Never married/never lived together	15-34 years	Brong Ahafo	Rural	Poorer	Improved source of drinking water	Unimproved
1361	Male	15-34 years	Secondary/SSS/SHS	Never married/never lived together	15-34 years	Brong Ahafo	Rural	Poorer	Improved source of drinking water	Unimproved
1362	Male	15-34 years	Primary	Never married/never lived together	15-34 years	Ashanti	Urban	Richer	Improved source of drinking water	Unimproved
1363	Male	15-34 years	Higher	Never married/never lived together	15-34 years	Ashanti	Urban	Richest	Improved source of drinking water	Unimproved
1364	Male	15-34 years	Higher	Never married/never lived together	15-34 years	Ashanti	Urban	Richest	Improved source of drinking water	Unimproved
1365	Male	15-34 years	Secondary/SSS/SHS	Never married/never lived together	15-34 years	Ashanti	Urban	Richest	Improved source of drinking water	Improved
1366	Male	15-34 years	Secondary/SSS/SHS	Never married/never lived together	15-34 years	Ashanti	Urban	Richer	Improved source of drinking water	Unimproved
1367	Male	15-34 years	Higher	Never married/never lived together	15-34 years	Western	Rural	Richer	Improved source of drinking water	Unimproved
1368	Male	15-34 years	Higher	Never married/never lived together	15-34 years	Western	Rural	Richer	Improved source of drinking water	Unimproved
1369	Male	15-34 years	No education/preschool	Never married/never lived together	15-34 years	Northern	Urban	Middle	Improved source of drinking water	Unimproved
1370	Male	15-34 years	Secondary/SSS/SHS	Never married/never lived together	15-34 years	Northern	Urban	Richer	Improved source of drinking water	Unimproved
1371	Male	15-34 years	Higher	Never married/never lived together	15-34 years	Greater Accra	Urban	Richer	Improved source of drinking water	Unimproved
1372	Male	15-34 years	Secondary/SSS/SHS	Never married/never lived together	15-34 years	Greater Accra	Urban	Richest	Improved source of drinking water	Unimproved
1373	Male	15-34 years	Higher	Never married/never lived together	15-34 years	Greater Accra	Urban	Richest	Improved source of drinking water	Unimproved
1374	Male	15-34 years	Secondary/SSS/SHS	Never married/never lived together	15-34 years	Ashanti	Urban	Richest	Improved source of drinking water	Unimproved
1375	Male	15-34 years	Middle/JSS/JHS	Never married/never lived together	15-34 years	Ashanti	Urban	Middle	Improved source of drinking water	Unimproved
1376	Male	15-34 years	Secondary/SSS/SHS	Never married/never lived together	15-34 years	Ashanti	Urban	Richer	Improved source of drinking water	Unimproved
1377	Male	15-34 years	Secondary/SSS/SHS	Never married/never lived together	15-34 years	Ashanti	Urban	Richer	Improved source of drinking water	Unimproved
1378	Male	15-34 years	Secondary/SSS/SHS	Never married/never lived together	15-34 years	Ashanti	Urban	Richer	Improved source of drinking water	Unimproved
1379	Male	15-34 years	Middle/JSS/JHS	Never married/never lived together	15-34 years	Ashanti	Urban	Richer	Improved source of drinking water	Unimproved
1380	Male	15-34 years	Middle/JSS/JHS	Never married/never lived together	15-34 years	Central	Rural	Middle	Improved source of drinking water	Unimproved
1381	Male	15-34 years	Primary	Never married/never lived together	15-34 years	Central	Rural	Poorer	Improved source of drinking water	Unimproved
1382	Male	15-34 years	Middle/JSS/JHS	Never married/never lived together	15-34 years	Eastern	Rural	Middle	Improved source of drinking water	Unimproved
1383	Male	15-34 years	Higher	Never married/never lived together	15-34 years	Greater Accra	Urban	Richest	Improved source of drinking water	Improved
1384	Male	15-34 years	Middle/JSS/JHS	Never married/never lived together	15-34 years	Greater Accra	Urban	Richer	Improved source of drinking water	Unimproved
1385	Male	15-34 years	Higher	Never married/never lived together	15-34 years	Greater Accra	Urban	Richest	Improved source of drinking water	Improved
1386	Male	15-34 years	Higher	Never married/never lived together	15-34 years	Greater Accra	Urban	Richest	Improved source of drinking water	Improved
1387	Male	15-34 years	Secondary/SSS/SHS	Never married/never lived together	15-34 years	Upper East	Rural	Poorest	Improved source of drinking water	Unimproved
1388	Male	15-34 years	Middle/JSS/JHS	Never married/never lived together	15-34 years	Volta	Urban	Richer	Unimproved source of drinking water	Unimproved
1389	Male	15-34 years	Higher	Never married/never lived together	15-34 years	Volta	Urban	Richest	Improved source of drinking water	Improved
1390	Male	15-34 years	Secondary/SSS/SHS	Never married/never lived together	15-34 years	Volta	Urban	Richest	Improved source of drinking water	Unimproved
1391	Male	15-34 years	Higher	Never married/never lived together	15-34 years	Volta	Urban	Richer	Improved source of drinking water	Unimproved
1392	Male	15-34 years	Secondary/SSS/SHS	Never married/never lived together	15-34 years	Volta	Urban	Richer	Improved source of drinking water	Improved
1393	Male	15-34 years	Middle/JSS/JHS	Never married/never lived together	15-34 years	Ashanti	Rural	Richer	Unimproved source of drinking water	Unimproved
1394	Male	15-34 years	Higher	Never married/never lived together	15-34 years	Ashanti	Rural	Middle	Improved source of drinking water	Unimproved
1395	Male	15-34 years	Middle/JSS/JHS	Never married/never lived together	15-34 years	Eastern	Rural	Middle	Improved source of drinking water	Unimproved
1396	Male	15-34 years	Primary	Never married/never lived together	15-34 years	Eastern	Rural	Middle	Improved source of drinking water	Unimproved
1397	Male	15-34 years	Middle/JSS/JHS	Never married/never lived together	15-34 years	Greater Accra	Urban	Richest	Improved source of drinking water	Unimproved
1398	Male	15-34 years	Higher	Never married/never lived together	15-34 years	Greater Accra	Urban	Richest	Improved source of drinking water	Unimproved
1399	Male	15-34 years	Primary	Never married/never lived together	15-34 years	Western	Rural	Poorer	Improved source of drinking water	Unimproved
1400	Male	15-34 years	Middle/JSS/JHS	Never married/never lived together	15-34 years	Western	Rural	Poorer	Improved source of drinking water	Unimproved
1401	Male	15-34 years	Secondary/SSS/SHS	Never married/never lived together	15-34 years	Greater Accra	Urban	Richer	Improved source of drinking water	Unimproved
1402	Male	15-34 years	Primary	Never married/never lived together	15-34 years	Northern	Rural	Poorest	Improved source of drinking water	Unimproved
1403	Male	15-34 years	Primary	Never married/never lived together	15-34 years	Brong Ahafo	Rural	Poorest	Unimproved source of drinking water	Unimproved
1404	Male	15-34 years	Middle/JSS/JHS	Never married/never lived together	15-34 years	Eastern	Rural	Middle	Improved source of drinking water	Unimproved
1405	Male	15-34 years	Secondary/SSS/SHS	Never married/never lived together	15-34 years	Eastern	Rural	Middle	Improved source of drinking water	Unimproved
1406	Male	15-34 years	Secondary/SSS/SHS	Never married/never lived together	15-34 years	Greater Accra	Urban	Richer	Improved source of drinking water	Unimproved
1407	Male	15-34 years	Middle/JSS/JHS	Never married/never lived together	15-34 years	Greater Accra	Urban	Richer	Improved source of drinking water	Unimproved
1408	Male	15-34 years	Middle/JSS/JHS	Never married/never lived together	15-34 years	Greater Accra	Urban	Richest	Improved source of drinking water	Unimproved
1409	Male	15-34 years	Higher	Never married/never lived together	15-34 years	Greater Accra	Urban	Richest	Improved source of drinking water	Unimproved
1410	Male	15-34 years	Higher	Never married/never lived together	15-34 years	Ashanti	Urban	Richest	Improved source of drinking water	Unimproved
1411	Male	15-34 years	Primary	Never married/never lived together	15-34 years	Ashanti	Urban	Richer	Improved source of drinking water	Unimproved
1412	Male	15-34 years	Secondary/SSS/SHS	Never married/never lived together	15-34 years	Ashanti	Urban	Richer	Improved source of drinking water	Unimproved
1413	Male	15-34 years	Primary	Never married/never lived together	15-34 years	Western	Rural	Poorer	Unimproved source of drinking water	Unimproved
1414	Male	15-34 years	Primary	Never married/never lived together	15-34 years	Western	Rural	Poorer	Unimproved source of drinking water	Unimproved
1415	Male	15-34 years	Middle/JSS/JHS	Never married/never lived together	15-34 years	Western	Rural	Poorer	Unimproved source of drinking water	Unimproved
1416	Male	15-34 years	Middle/JSS/JHS	Never married/never lived together	15-34 years	Western	Rural	Middle	Unimproved source of drinking water	Unimproved
1417	Male	15-34 years	Secondary/SSS/SHS	Never married/never lived together	15-34 years	Western	Rural	Middle	Unimproved source of drinking water	Unimproved
1418	Male	15-34 years	Middle/JSS/JHS	Never married/never lived together	15-34 years	Western	Rural	Middle	Improved source of drinking water	Improved
1419	Male	15-34 years	Middle/JSS/JHS	Never married/never lived together	15-34 years	Western	Rural	Poorer	Unimproved source of drinking water	Unimproved
1420	Male	15-34 years	No education/preschool	Never married/never lived together	15-34 years	Western	Rural	Poorest	Unimproved source of drinking water	Unimproved
1421	Male	15-34 years	Middle/JSS/JHS	Never married/never lived together	15-34 years	Ashanti	Urban	Richest	Improved source of drinking water	Unimproved
1422	Male	15-34 years	Secondary/SSS/SHS	Never married/never lived together	15-34 years	Ashanti	Urban	Richest	Improved source of drinking water	Unimproved
1423	Male	15-34 years	Middle/JSS/JHS	Never married/never lived together	15-34 years	Ashanti	Urban	Richest	Improved source of drinking water	Unimproved
1424	Male	15-34 years	Secondary/SSS/SHS	Never married/never lived together	15-34 years	Ashanti	Urban	Richest	Improved source of drinking water	Unimproved
1425	Male	15-34 years	Secondary/SSS/SHS	Never married/never lived together	15-34 years	Central	Urban	Richer	Improved source of drinking water	Unimproved
1426	Male	15-34 years	Middle/JSS/JHS	Never married/never lived together	15-34 years	Central	Urban	Richest	Improved source of drinking water	Unimproved
1427	Male	15-34 years	Secondary/SSS/SHS	Never married/never lived together	15-34 years	Central	Urban	Middle	Improved source of drinking water	Unimproved
1428	Male	15-34 years	Secondary/SSS/SHS	Never married/never lived together	15-34 years	Brong Ahafo	Urban	Richest	Improved source of drinking water	Unimproved
1429	Male	15-34 years	Higher	Never married/never lived together	15-34 years	Brong Ahafo	Urban	Richer	Improved source of drinking water	Unimproved
1430	Male	15-34 years	Middle/JSS/JHS	Never married/never lived together	15-34 years	Brong Ahafo	Urban	Richer	Improved source of drinking water	Unimproved
1431	Male	15-34 years	Secondary/SSS/SHS	Never married/never lived together	15-34 years	Brong Ahafo	Urban	Richest	Improved source of drinking water	Unimproved
1432	Male	15-34 years	Higher	Never married/never lived together	15-34 years	Upper West	Urban	Richest	Improved source of drinking water	Unimproved
1433	Male	15-34 years	Higher	Never married/never lived together	15-34 years	Upper West	Urban	Poorest	Improved source of drinking water	Improved
1434	Male	15-34 years	Higher	Never married/never lived together	15-34 years	Upper West	Urban	Richer	Improved source of drinking water	Unimproved
1435	Male	15-34 years	Primary	Never married/never lived together	15-34 years	Western	Urban	Middle	Improved source of drinking water	Unimproved
1436	Male	15-34 years	Middle/JSS/JHS	Never married/never lived together	15-34 years	Greater Accra	Urban	Middle	Improved source of drinking water	Unimproved
1437	Male	15-34 years	Higher	Never married/never lived together	15-34 years	Greater Accra	Urban	Richer	Improved source of drinking water	Unimproved
1438	Male	15-34 years	Secondary/SSS/SHS	Never married/never lived together	15-34 years	Greater Accra	Urban	Richest	Improved source of drinking water	Unimproved
1439	Male	15-34 years	Secondary/SSS/SHS	Never married/never lived together	15-34 years	Greater Accra	Urban	Richer	Improved source of drinking water	Unimproved
1440	Male	15-34 years	Secondary/SSS/SHS	Never married/never lived together	15-34 years	Greater Accra	Urban	Richest	Improved source of drinking water	Improved
1441	Male	15-34 years	Middle/JSS/JHS	Never married/never lived together	15-34 years	Greater Accra	Urban	Middle	Improved source of drinking water	Unimproved
1442	Male	15-34 years	Secondary/SSS/SHS	Never married/never lived together	15-34 years	Ashanti	Urban	Richest	Improved source of drinking water	Unimproved
1443	Male	15-34 years	Middle/JSS/JHS	Never married/never lived together	15-34 years	Ashanti	Urban	Richer	Unimproved source of drinking water	Unimproved
1444	Male	15-34 years	Secondary/SSS/SHS	Never married/never lived together	15-34 years	Volta	Urban	Richer	Improved source of drinking water	Unimproved
1445	Male	15-34 years	Middle/JSS/JHS	Never married/never lived together	15-34 years	Volta	Rural	Middle	Improved source of drinking water	Improved
1446	Male	15-34 years	Middle/JSS/JHS	Never married/never lived together	15-34 years	Volta	Rural	Poorer	Improved source of drinking water	Unimproved
1447	Male	15-34 years	Secondary/SSS/SHS	Never married/never lived together	15-34 years	Volta	Rural	Middle	Improved source of drinking water	Unimproved
1448	Male	15-34 years	Middle/JSS/JHS	Never married/never lived together	15-34 years	Volta	Rural	Middle	Improved source of drinking water	Unimproved
1449	Male	15-34 years	Primary	Never married/never lived together	15-34 years	Volta	Rural	Middle	Improved source of drinking water	Unimproved
1450	Male	15-34 years	Middle/JSS/JHS	Never married/never lived together	15-34 years	Western	Urban	Richer	Improved source of drinking water	Unimproved
1451	Male	15-34 years	Higher	Never married/never lived together	15-34 years	Western	Urban	Richest	Improved source of drinking water	Unimproved
1452	Male	15-34 years	Middle/JSS/JHS	Never married/never lived together	15-34 years	Brong Ahafo	Urban	Middle	Unimproved source of drinking water	Unimproved
1453	Male	15-34 years	Secondary/SSS/SHS	Never married/never lived together	15-34 years	Brong Ahafo	Urban	Middle	Unimproved source of drinking water	Unimproved
1454	Male	15-34 years	Primary	Never married/never lived together	15-34 years	Brong Ahafo	Urban	Middle	Improved source of drinking water	Unimproved
1455	Male	15-34 years	Higher	Never married/never lived together	15-34 years	Upper East	Urban	Richest	Improved source of drinking water	Unimproved
1456	Male	15-34 years	Higher	Never married/never lived together	15-34 years	Upper East	Urban	Richer	Improved source of drinking water	Unimproved
1457	Male	15-34 years	Middle/JSS/JHS	Never married/never lived together	15-34 years	Eastern	Rural	Poorer	Unimproved source of drinking water	Unimproved
1458	Male	15-34 years	Middle/JSS/JHS	Never married/never lived together	15-34 years	Eastern	Rural	Poorer	Unimproved source of drinking water	Improved
1459	Male	15-34 years	Middle/JSS/JHS	Never married/never lived together	15-34 years	Eastern	Rural	Poorest	Unimproved source of drinking water	Unimproved
1460	Male	15-34 years	Middle/JSS/JHS	Never married/never lived together	15-34 years	Eastern	Rural	Poorer	Unimproved source of drinking water	Unimproved
1461	Male	15-34 years	Secondary/SSS/SHS	Never married/never lived together	15-34 years	Eastern	Rural	Middle	Unimproved source of drinking water	Unimproved
1462	Male	15-34 years	Middle/JSS/JHS	Never married/never lived together	15-34 years	Eastern	Rural	Poorer	Unimproved source of drinking water	Unimproved
1463	Male	15-34 years	Higher	Never married/never lived together	15-34 years	Greater Accra	Urban	Richest	Improved source of drinking water	Improved
1464	Male	15-34 years	Middle/JSS/JHS	Never married/never lived together	15-34 years	Greater Accra	Urban	Richer	Improved source of drinking water	Unimproved
1465	Male	15-34 years	Middle/JSS/JHS	Never married/never lived together	15-34 years	Greater Accra	Urban	Richest	Improved source of drinking water	Unimproved
1466	Male	15-34 years	Higher	Never married/never lived together	15-34 years	Ashanti	Urban	Richest	Improved source of drinking water	Unimproved
1467	Male	15-34 years	Higher	Never married/never lived together	15-34 years	Ashanti	Urban	Richest	Improved source of drinking water	Unimproved
1468	Male	15-34 years	Secondary/SSS/SHS	Never married/never lived together	15-34 years	Ashanti	Urban	Richest	Improved source of drinking water	Unimproved
1469	Male	15-34 years	Secondary/SSS/SHS	Never married/never lived together	15-34 years	Ashanti	Urban	Richest	Improved source of drinking water	Unimproved
1470	Male	15-34 years	Higher	Never married/never lived together	15-34 years	Northern	Rural	Middle	Improved source of drinking water	Unimproved
1471	Male	15-34 years	Middle/JSS/JHS	Never married/never lived together	15-34 years	Volta	Urban	Poorer	Improved source of drinking water	Unimproved
1472	Male	15-34 years	Higher	Never married/never lived together	15-34 years	Volta	Urban	Richer	Improved source of drinking water	Unimproved
1473	Male	15-34 years	Secondary/SSS/SHS	Never married/never lived together	15-34 years	Volta	Urban	Poorer	Improved source of drinking water	Unimproved
1474	Male	15-34 years	Secondary/SSS/SHS	Never married/never lived together	15-34 years	Volta	Urban	Richer	Improved source of drinking water	Unimproved
1475	Male	15-34 years	Primary	Never married/never lived together	15-34 years	Brong Ahafo	Rural	Poorest	Improved source of drinking water	Unimproved
1476	Male	15-34 years	Primary	Never married/never lived together	15-34 years	Brong Ahafo	Rural	Poorest	Improved source of drinking water	Unimproved
1477	Male	15-34 years	Middle/JSS/JHS	Never married/never lived together	15-34 years	Volta	Rural	Richer	Improved source of drinking water	Unimproved
1478	Male	15-34 years	Middle/JSS/JHS	Never married/never lived together	15-34 years	Volta	Rural	Middle	Improved source of drinking water	Unimproved
1479	Male	15-34 years	Primary	Never married/never lived together	15-34 years	Volta	Rural	Middle	Improved source of drinking water	Unimproved
1480	Male	15-34 years	Secondary/SSS/SHS	Never married/never lived together	15-34 years	Volta	Rural	Richer	Improved source of drinking water	Unimproved
1481	Male	15-34 years	Middle/JSS/JHS	Never married/never lived together	15-34 years	Volta	Urban	Richer	Improved source of drinking water	Unimproved
1482	Male	15-34 years	Secondary/SSS/SHS	Never married/never lived together	15-34 years	Volta	Urban	Richer	Improved source of drinking water	Unimproved
1483	Male	15-34 years	Secondary/SSS/SHS	Never married/never lived together	15-34 years	Volta	Urban	Richer	Improved source of drinking water	Unimproved
1484	Male	15-34 years	Secondary/SSS/SHS	Never married/never lived together	15-34 years	Volta	Urban	Richer	Improved source of drinking water	Unimproved
1485	Male	15-34 years	Higher	Never married/never lived together	15-34 years	Volta	Urban	Richer	Improved source of drinking water	Unimproved
1486	Male	15-34 years	Secondary/SSS/SHS	Never married/never lived together	15-34 years	Eastern	Urban	Richest	Improved source of drinking water	Unimproved
1487	Male	15-34 years	Secondary/SSS/SHS	Never married/never lived together	15-34 years	Eastern	Urban	Richest	Improved source of drinking water	Unimproved
1488	Male	15-34 years	Middle/JSS/JHS	Never married/never lived together	15-34 years	Eastern	Urban	Richer	Improved source of drinking water	Unimproved
1489	Male	15-34 years	Secondary/SSS/SHS	Never married/never lived together	15-34 years	Eastern	Urban	Richer	Improved source of drinking water	Unimproved
1490	Male	15-34 years	Secondary/SSS/SHS	Never married/never lived together	15-34 years	Volta	Urban	Richest	Improved source of drinking water	Unimproved
1491	Male	15-34 years	Middle/JSS/JHS	Never married/never lived together	15-34 years	Volta	Urban	Richer	Improved source of drinking water	Unimproved
1492	Male	15-34 years	No education/preschool	Never married/never lived together	15-34 years	Volta	Urban	Middle	Improved source of drinking water	Unimproved
1493	Male	15-34 years	Secondary/SSS/SHS	Never married/never lived together	15-34 years	Northern	Urban	Middle	Improved source of drinking water	Unimproved
1494	Male	15-34 years	Middle/JSS/JHS	Never married/never lived together	15-34 years	Northern	Urban	Richer	Improved source of drinking water	Unimproved
1495	Male	15-34 years	Higher	Never married/never lived together	15-34 years	Northern	Urban	Richest	Improved source of drinking water	Unimproved
1496	Male	15-34 years	No education/preschool	Never married/never lived together	15-34 years	Northern	Urban	Middle	Improved source of drinking water	Unimproved
1497	Male	15-34 years	No education/preschool	Never married/never lived together	15-34 years	Upper West	Rural	Poorest	Improved source of drinking water	Unimproved
1498	Male	15-34 years	No education/preschool	Never married/never lived together	15-34 years	Upper West	Rural	Poorest	Improved source of drinking water	Unimproved
1499	Male	15-34 years	No education/preschool	Never married/never lived together	15-34 years	Brong Ahafo	Urban	Poorer	Improved source of drinking water	Unimproved
1500	Male	15-34 years	Middle/JSS/JHS	Never married/never lived together	15-34 years	Brong Ahafo	Urban	Poorer	Improved source of drinking water	Unimproved
1501	Male	15-34 years	Higher	Never married/never lived together	15-34 years	Brong Ahafo	Urban	Richest	Improved source of drinking water	Unimproved
1502	Male	15-34 years	Middle/JSS/JHS	Never married/never lived together	15-34 years	Brong Ahafo	Urban	Middle	Improved source of drinking water	Unimproved
1503	Male	15-34 years	Middle/JSS/JHS	Never married/never lived together	15-34 years	Brong Ahafo	Urban	Poorer	Improved source of drinking water	Unimproved
1504	Male	15-34 years	Secondary/SSS/SHS	Never married/never lived together	15-34 years	Brong Ahafo	Urban	Richest	Improved source of drinking water	Unimproved
1505	Male	15-34 years	Secondary/SSS/SHS	Never married/never lived together	15-34 years	Brong Ahafo	Urban	Middle	Improved source of drinking water	Improved
1506	Male	15-34 years	Middle/JSS/JHS	Never married/never lived together	15-34 years	Brong Ahafo	Urban	Middle	Improved source of drinking water	Unimproved
1507	Male	15-34 years	Secondary/SSS/SHS	Never married/never lived together	15-34 years	Northern	Rural	Poorest	Improved source of drinking water	Unimproved
1508	Male	15-34 years	Higher	Never married/never lived together	15-34 years	Brong Ahafo	Urban	Richer	Improved source of drinking water	Unimproved
1509	Male	15-34 years	Secondary/SSS/SHS	Never married/never lived together	15-34 years	Brong Ahafo	Urban	Middle	Improved source of drinking water	Unimproved
1510	Male	15-34 years	Middle/JSS/JHS	Never married/never lived together	15-34 years	Brong Ahafo	Urban	Middle	Unimproved source of drinking water	Unimproved
1511	Male	15-34 years	Secondary/SSS/SHS	Never married/never lived together	15-34 years	Western	Rural	Middle	Improved source of drinking water	Unimproved
1512	Male	15-34 years	Middle/JSS/JHS	Never married/never lived together	15-34 years	Western	Rural	Middle	Improved source of drinking water	Unimproved
1513	Male	15-34 years	Middle/JSS/JHS	Never married/never lived together	15-34 years	Western	Rural	Middle	Unimproved source of drinking water	Unimproved
1514	Male	15-34 years	Secondary/SSS/SHS	Never married/never lived together	15-34 years	Ashanti	Urban	Richer	Improved source of drinking water	Unimproved
1515	Male	15-34 years	Secondary/SSS/SHS	Never married/never lived together	15-34 years	Ashanti	Urban	Richest	Improved source of drinking water	Unimproved
1516	Male	15-34 years	Secondary/SSS/SHS	Never married/never lived together	15-34 years	Ashanti	Urban	Richest	Improved source of drinking water	Unimproved
1517	Male	15-34 years	Higher	Never married/never lived together	15-34 years	Ashanti	Urban	Richest	Improved source of drinking water	Unimproved
1518	Male	15-34 years	Secondary/SSS/SHS	Never married/never lived together	15-34 years	Ashanti	Urban	Richest	Improved source of drinking water	Unimproved
1519	Male	15-34 years	No education/preschool	Never married/never lived together	15-34 years	Upper West	Rural	Poorest	Improved source of drinking water	Unimproved
1520	Male	15-34 years	Middle/JSS/JHS	Never married/never lived together	15-34 years	Upper West	Rural	Poorer	Improved source of drinking water	Unimproved
1521	Male	15-34 years	Secondary/SSS/SHS	Never married/never lived together	15-34 years	Volta	Rural	Richer	Improved source of drinking water	Unimproved
1522	Male	15-34 years	Secondary/SSS/SHS	Never married/never lived together	15-34 years	Ashanti	Urban	Middle	Improved source of drinking water	Unimproved
1523	Male	15-34 years	Higher	Never married/never lived together	15-34 years	Ashanti	Urban	Richest	Improved source of drinking water	Unimproved
1524	Male	15-34 years	Secondary/SSS/SHS	Never married/never lived together	15-34 years	Ashanti	Urban	Richest	Improved source of drinking water	Unimproved
1525	Male	15-34 years	Secondary/SSS/SHS	Never married/never lived together	15-34 years	Ashanti	Urban	Richer	Improved source of drinking water	Unimproved
1526	Male	15-34 years	Secondary/SSS/SHS	Never married/never lived together	15-34 years	Upper West	Urban	Middle	Improved source of drinking water	Unimproved
1527	Male	15-34 years	Middle/JSS/JHS	Never married/never lived together	15-34 years	Upper West	Urban	Richer	Improved source of drinking water	Unimproved
1528	Male	15-34 years	Secondary/SSS/SHS	Never married/never lived together	15-34 years	Upper West	Urban	Richer	Improved source of drinking water	Unimproved
1529	Male	15-34 years	Middle/JSS/JHS	Never married/never lived together	15-34 years	Upper West	Urban	Middle	Improved source of drinking water	Unimproved
1530	Male	15-34 years	Higher	Never married/never lived together	15-34 years	Eastern	Urban	Richest	Improved source of drinking water	Unimproved
1531	Female	35-54 years	Middle/JSS/JHS	Never married/never lived together	35-54 years	Ashanti	Urban	Richest	Improved source of drinking water	Improved
1532	Female	35-54 years	Middle/JSS/JHS	Never married/never lived together	35-54 years	Ashanti	Urban	Richest	Improved source of drinking water	Unimproved
1533	Female	35-54 years	Primary	Never married/never lived together	35-54 years	Brong Ahafo	Rural	Middle	Improved source of drinking water	Improved
1534	Female	35-54 years	Higher	Never married/never lived together	35-54 years	Eastern	Rural	Middle	Improved source of drinking water	Unimproved
1535	Female	35-54 years	Middle/JSS/JHS	Never married/never lived together	35-54 years	Brong Ahafo	Urban	Middle	Improved source of drinking water	Unimproved
1536	Female	35-54 years	Middle/JSS/JHS	Never married/never lived together	35-54 years	Western	Urban	Richer	Improved source of drinking water	Unimproved
1537	Female	35-54 years	Primary	Never married/never lived together	35-54 years	Greater Accra	Urban	Richer	Improved source of drinking water	Unimproved
1538	Female	35-54 years	No education/preschool	Never married/never lived together	35-54 years	Central	Rural	Poorer	Improved source of drinking water	Unimproved
1539	Female	35-54 years	Middle/JSS/JHS	Never married/never lived together	35-54 years	Central	Rural	Middle	Improved source of drinking water	Unimproved
1540	Female	35-54 years	Middle/JSS/JHS	Never married/never lived together	35-54 years	Western	Urban	Richer	Improved source of drinking water	Unimproved
1541	Female	35-54 years	Middle/JSS/JHS	Never married/never lived together	35-54 years	Eastern	Rural	Poorer	Improved source of drinking water	Unimproved
1542	Female	35-54 years	Secondary/SSS/SHS	Never married/never lived together	35-54 years	Ashanti	Urban	Richest	Improved source of drinking water	Unimproved
1543	Female	35-54 years	No education/preschool	Never married/never lived together	35-54 years	Ashanti	Rural	Poorest	Unimproved source of drinking water	Unimproved
1544	Female	35-54 years	Middle/JSS/JHS	Never married/never lived together	35-54 years	Western	Urban	Richest	Improved source of drinking water	Unimproved
1545	Female	35-54 years	Secondary/SSS/SHS	Never married/never lived together	35-54 years	Greater Accra	Urban	Richest	Improved source of drinking water	Improved
1546	Female	35-54 years	Middle/JSS/JHS	Never married/never lived together	35-54 years	Greater Accra	Urban	Middle	Improved source of drinking water	Unimproved
1547	Female	35-54 years	Middle/JSS/JHS	Never married/never lived together	35-54 years	Volta	Rural	Poorer	Improved source of drinking water	Unimproved
1548	Female	35-54 years	Middle/JSS/JHS	Never married/never lived together	35-54 years	Volta	Rural	Middle	Improved source of drinking water	Unimproved
1549	Female	35-54 years	Middle/JSS/JHS	Never married/never lived together	35-54 years	Volta	Urban	Richer	Improved source of drinking water	Unimproved
1550	Female	35-54 years	Middle/JSS/JHS	Never married/never lived together	35-54 years	Volta	Rural	Poorer	Improved source of drinking water	Unimproved
1551	Female	35-54 years	Primary	Never married/never lived together	35-54 years	Western	Urban	Richer	Improved source of drinking water	Unimproved
1552	Female	35-54 years	Higher	Never married/never lived together	35-54 years	Greater Accra	Urban	Richest	Improved source of drinking water	Unimproved
1553	Female	35-54 years	Middle/JSS/JHS	Never married/never lived together	35-54 years	Western	Urban	Middle	Improved source of drinking water	Unimproved
1554	Female	35-54 years	Primary	Never married/never lived together	35-54 years	Western	Urban	Richer	Improved source of drinking water	Unimproved
1555	Female	35-54 years	Middle/JSS/JHS	Never married/never lived together	35-54 years	Brong Ahafo	Urban	Middle	Improved source of drinking water	Unimproved
1556	Female	35-54 years	No education/preschool	Never married/never lived together	35-54 years	Upper East	Rural	Poorest	Improved source of drinking water	Unimproved
1557	Female	35-54 years	Primary	Never married/never lived together	35-54 years	Greater Accra	Urban	Richest	Improved source of drinking water	Unimproved
1558	Female	35-54 years	Middle/JSS/JHS	Never married/never lived together	35-54 years	Western	Rural	Middle	Improved source of drinking water	Unimproved
1559	Female	35-54 years	Secondary/SSS/SHS	Never married/never lived together	35-54 years	Greater Accra	Urban	Richest	Improved source of drinking water	Unimproved
1560	Female	35-54 years	Middle/JSS/JHS	Never married/never lived together	35-54 years	Greater Accra	Urban	Richest	Improved source of drinking water	Unimproved
1561	Female	35-54 years	Secondary/SSS/SHS	Never married/never lived together	35-54 years	Greater Accra	Urban	Middle	Improved source of drinking water	Unimproved
1562	Female	35-54 years	Middle/JSS/JHS	Never married/never lived together	35-54 years	Ashanti	Urban	Richer	Improved source of drinking water	Unimproved
1563	Female	35-54 years	Middle/JSS/JHS	Never married/never lived together	35-54 years	Western	Urban	Middle	Improved source of drinking water	Unimproved
1564	Female	35-54 years	Middle/JSS/JHS	Never married/never lived together	35-54 years	Ashanti	Urban	Middle	Improved source of drinking water	Unimproved
1565	Female	35-54 years	Primary	Never married/never lived together	35-54 years	Greater Accra	Urban	Richer	Improved source of drinking water	Unimproved
1566	Female	35-54 years	Secondary/SSS/SHS	Never married/never lived together	35-54 years	Greater Accra	Urban	Richest	Improved source of drinking water	Unimproved
1567	Female	35-54 years	Secondary/SSS/SHS	Never married/never lived together	35-54 years	Greater Accra	Urban	Richest	Improved source of drinking water	Improved
1568	Female	35-54 years	Middle/JSS/JHS	Never married/never lived together	35-54 years	Central	Urban	Richer	Improved source of drinking water	Unimproved
1569	Female	35-54 years	Secondary/SSS/SHS	Never married/never lived together	35-54 years	Eastern	Rural	Middle	Improved source of drinking water	Unimproved
1570	Female	35-54 years	Secondary/SSS/SHS	Never married/never lived together	35-54 years	Eastern	Urban	Richer	Improved source of drinking water	Unimproved
1571	Female	35-54 years	Secondary/SSS/SHS	Never married/never lived together	35-54 years	Eastern	Urban	Richer	Improved source of drinking water	Unimproved
1572	Female	35-54 years	No education/preschool	Never married/never lived together	35-54 years	Ashanti	Urban	Richer	Improved source of drinking water	Improved
1573	Female	35-54 years	Middle/JSS/JHS	Never married/never lived together	35-54 years	Western	Urban	Richer	Improved source of drinking water	Unimproved
1574	Female	35-54 years	Primary	Never married/never lived together	35-54 years	Volta	Urban	Richer	Improved source of drinking water	Improved
1575	Female	35-54 years	Middle/JSS/JHS	Never married/never lived together	35-54 years	Ashanti	Rural	Middle	Improved source of drinking water	Improved
1576	Female	35-54 years	Higher	Never married/never lived together	35-54 years	Central	Urban	Richest	Improved source of drinking water	Improved
1577	Female	35-54 years	No education/preschool	Never married/never lived together	35-54 years	Greater Accra	Urban	Richest	Improved source of drinking water	Unimproved
1578	Female	35-54 years	Higher	Never married/never lived together	35-54 years	Greater Accra	Urban	Richest	Improved source of drinking water	Unimproved
1579	Female	35-54 years	Middle/JSS/JHS	Never married/never lived together	35-54 years	Ashanti	Urban	Richer	Improved source of drinking water	Unimproved
1580	Female	35-54 years	Secondary/SSS/SHS	Never married/never lived together	35-54 years	Upper West	Urban	Middle	Improved source of drinking water	Unimproved
1581	Female	35-54 years	Higher	Never married/never lived together	35-54 years	Greater Accra	Urban	Richest	Improved source of drinking water	Improved
1582	Female	35-54 years	Secondary/SSS/SHS	Never married/never lived together	35-54 years	Eastern	Urban	Middle	Improved source of drinking water	Unimproved
1583	Female	35-54 years	Middle/JSS/JHS	Never married/never lived together	35-54 years	Central	Rural	Middle	Improved source of drinking water	Unimproved
1584	Female	35-54 years	Middle/JSS/JHS	Never married/never lived together	35-54 years	Volta	Rural	Poorer	Improved source of drinking water	Unimproved
1585	Female	35-54 years	Higher	Never married/never lived together	35-54 years	Volta	Rural	Richer	Improved source of drinking water	Unimproved
1586	Female	35-54 years	Middle/JSS/JHS	Never married/never lived together	35-54 years	Greater Accra	Urban	Richer	Improved source of drinking water	Unimproved
1587	Female	35-54 years	Primary	Never married/never lived together	35-54 years	Volta	Rural	Middle	Improved source of drinking water	Unimproved
1588	Female	35-54 years	Middle/JSS/JHS	Never married/never lived together	35-54 years	Central	Urban	Richest	Improved source of drinking water	Unimproved
1589	Female	35-54 years	Middle/JSS/JHS	Never married/never lived together	35-54 years	Greater Accra	Urban	Richer	Improved source of drinking water	Unimproved
1590	Female	35-54 years	Middle/JSS/JHS	Never married/never lived together	35-54 years	Ashanti	Urban	Richer	Improved source of drinking water	Unimproved
1591	Female	35-54 years	Secondary/SSS/SHS	Never married/never lived together	35-54 years	Western	Rural	Middle	Improved source of drinking water	Unimproved
1592	Female	35-54 years	Secondary/SSS/SHS	Never married/never lived together	35-54 years	Greater Accra	Urban	Richer	Improved source of drinking water	Unimproved
1593	Female	35-54 years	Middle/JSS/JHS	Never married/never lived together	35-54 years	Eastern	Rural	Poorest	Improved source of drinking water	Unimproved
1594	Female	35-54 years	Middle/JSS/JHS	Never married/never lived together	35-54 years	Western	Urban	Richer	Improved source of drinking water	Unimproved
1595	Female	35-54 years	Middle/JSS/JHS	Never married/never lived together	35-54 years	Central	Urban	Richer	Improved source of drinking water	Unimproved
1596	Female	35-54 years	Secondary/SSS/SHS	Never married/never lived together	35-54 years	Central	Urban	Richer	Improved source of drinking water	Unimproved
1597	Female	35-54 years	Middle/JSS/JHS	Never married/never lived together	35-54 years	Greater Accra	Urban	Richest	Improved source of drinking water	Unimproved
1598	Female	35-54 years	Middle/JSS/JHS	Never married/never lived together	35-54 years	Ashanti	Urban	Richest	Improved source of drinking water	Improved
1599	Female	35-54 years	Higher	Never married/never lived together	35-54 years	Volta	Urban	Richest	Improved source of drinking water	Unimproved
1600	Female	35-54 years	No education/preschool	Never married/never lived together	35-54 years	Northern	Urban	Middle	Improved source of drinking water	Unimproved
1601	Female	35-54 years	Middle/JSS/JHS	Never married/never lived together	35-54 years	Volta	Rural	Middle	Improved source of drinking water	Unimproved
1602	Male	35-54 years	No education/preschool	Never married/never lived together	35-54 years	Central	Rural	Poorer	Improved source of drinking water	Unimproved
1603	Male	35-54 years	Middle/JSS/JHS	Never married/never lived together	35-54 years	Ashanti	Urban	Richer	Improved source of drinking water	Unimproved
1604	Male	35-54 years	Middle/JSS/JHS	Never married/never lived together	35-54 years	Brong Ahafo	Urban	Richer	Improved source of drinking water	Unimproved
1605	Male	35-54 years	Primary	Never married/never lived together	35-54 years	Brong Ahafo	Rural	Poorer	Improved source of drinking water	Unimproved
1606	Male	35-54 years	Primary	Never married/never lived together	35-54 years	Eastern	Rural	Poorer	Unimproved source of drinking water	Unimproved
1607	Male	35-54 years	Secondary/SSS/SHS	Never married/never lived together	35-54 years	Brong Ahafo	Urban	Richer	Improved source of drinking water	Unimproved
1608	Male	35-54 years	No education/preschool	Never married/never lived together	35-54 years	Upper West	Rural	Poorest	Improved source of drinking water	Unimproved
1609	Male	35-54 years	Middle/JSS/JHS	Never married/never lived together	35-54 years	Central	Urban	Richer	Improved source of drinking water	Unimproved
1610	Male	35-54 years	Primary	Never married/never lived together	35-54 years	Eastern	Rural	Poorer	Improved source of drinking water	Unimproved
1611	Male	35-54 years	Middle/JSS/JHS	Never married/never lived together	35-54 years	Greater Accra	Rural	Middle	Improved source of drinking water	Unimproved
1612	Male	35-54 years	Secondary/SSS/SHS	Never married/never lived together	35-54 years	Greater Accra	Urban	Richest	Improved source of drinking water	Unimproved
1613	Male	35-54 years	Middle/JSS/JHS	Never married/never lived together	35-54 years	Volta	Urban	Middle	Unimproved source of drinking water	Unimproved
1614	Male	35-54 years	Higher	Never married/never lived together	35-54 years	Central	Rural	Richer	Improved source of drinking water	Unimproved
1615	Male	35-54 years	Middle/JSS/JHS	Never married/never lived together	35-54 years	Eastern	Urban	Richer	Improved source of drinking water	Unimproved
1616	Male	35-54 years	No education/preschool	Never married/never lived together	35-54 years	Brong Ahafo	Rural	Poorer	Improved source of drinking water	Unimproved
1617	Male	35-54 years	Primary	Never married/never lived together	35-54 years	Brong Ahafo	Rural	Poorer	Improved source of drinking water	Unimproved
1618	Male	35-54 years	Primary	Never married/never lived together	35-54 years	Brong Ahafo	Rural	Poorer	Improved source of drinking water	Unimproved
1619	Male	35-54 years	Primary	Never married/never lived together	35-54 years	Volta	Urban	Middle	Improved source of drinking water	Unimproved
1620	Male	35-54 years	Primary	Never married/never lived together	35-54 years	Eastern	Rural	Middle	Improved source of drinking water	Unimproved
1621	Male	35-54 years	Middle/JSS/JHS	Never married/never lived together	35-54 years	Eastern	Rural	Poorer	Improved source of drinking water	Unimproved
1622	Male	35-54 years	Secondary/SSS/SHS	Never married/never lived together	35-54 years	Northern	Rural	Poorer	Unimproved source of drinking water	Unimproved
1623	Male	35-54 years	Middle/JSS/JHS	Never married/never lived together	35-54 years	Western	Rural	Middle	Unimproved source of drinking water	Improved
1624	Male	35-54 years	Higher	Never married/never lived together	35-54 years	Western	Urban	Richest	Improved source of drinking water	Improved
1625	Male	35-54 years	Middle/JSS/JHS	Never married/never lived together	35-54 years	Greater Accra	Urban	Richest	Improved source of drinking water	Improved
1626	Male	35-54 years	Secondary/SSS/SHS	Never married/never lived together	35-54 years	Greater Accra	Urban	Richest	Improved source of drinking water	Improved
1627	Male	35-54 years	Higher	Never married/never lived together	35-54 years	Eastern	Urban	Richest	Improved source of drinking water	Unimproved
1628	Male	35-54 years	Middle/JSS/JHS	Never married/never lived together	35-54 years	Brong Ahafo	Urban	Richer	Improved source of drinking water	Unimproved
1629	Male	35-54 years	Higher	Never married/never lived together	35-54 years	Ashanti	Urban	Richest	Improved source of drinking water	Unimproved
1630	Male	35-54 years	Secondary/SSS/SHS	Never married/never lived together	35-54 years	Western	Urban	Richer	Improved source of drinking water	Unimproved
1631	Male	35-54 years	Higher	Never married/never lived together	35-54 years	Western	Urban	Richer	Improved source of drinking water	Unimproved
1632	Male	35-54 years	Middle/JSS/JHS	Never married/never lived together	35-54 years	Greater Accra	Rural	Poorest	Improved source of drinking water	Unimproved
1633	Male	35-54 years	Middle/JSS/JHS	Never married/never lived together	35-54 years	Greater Accra	Urban	Richer	Improved source of drinking water	Unimproved
1634	Male	35-54 years	Secondary/SSS/SHS	Never married/never lived together	35-54 years	Brong Ahafo	Urban	Richer	Improved source of drinking water	Unimproved
1635	Male	35-54 years	Middle/JSS/JHS	Never married/never lived together	35-54 years	Volta	Rural	Poorest	Improved source of drinking water	Unimproved
1636	Male	35-54 years	Higher	Never married/never lived together	35-54 years	Greater Accra	Urban	Richest	Improved source of drinking water	Improved
1637	Male	35-54 years	No education/preschool	Never married/never lived together	35-54 years	Upper West	Rural	Poorest	Improved source of drinking water	Unimproved
1638	Male	35-54 years	Secondary/SSS/SHS	Never married/never lived together	35-54 years	Western	Rural	Richer	Improved source of drinking water	Unimproved
1639	Male	35-54 years	Middle/JSS/JHS	Never married/never lived together	35-54 years	Greater Accra	Urban	Richest	Improved source of drinking water	Unimproved
1640	Male	35-54 years	Middle/JSS/JHS	Never married/never lived together	35-54 years	Greater Accra	Urban	Richest	Improved source of drinking water	Unimproved
1641	Male	35-54 years	Secondary/SSS/SHS	Never married/never lived together	35-54 years	Greater Accra	Urban	Richest	Improved source of drinking water	Unimproved
1642	Male	35-54 years	Higher	Never married/never lived together	35-54 years	Central	Urban	Richest	Improved source of drinking water	Unimproved
1643	Male	35-54 years	Middle/JSS/JHS	Never married/never lived together	35-54 years	Greater Accra	Rural	Richer	Improved source of drinking water	Unimproved
1644	Male	35-54 years	No education/preschool	Never married/never lived together	35-54 years	Brong Ahafo	Rural	Poorest	Unimproved source of drinking water	Unimproved
1645	Male	35-54 years	Higher	Never married/never lived together	35-54 years	Central	Urban	Richest	Improved source of drinking water	Improved
1646	Male	35-54 years	No education/preschool	Never married/never lived together	35-54 years	Upper East	Rural	Poorest	Improved source of drinking water	Unimproved
1647	Male	35-54 years	Primary	Never married/never lived together	35-54 years	Brong Ahafo	Urban	Poorest	Improved source of drinking water	Unimproved
1648	Male	35-54 years	Secondary/SSS/SHS	Never married/never lived together	35-54 years	Central	Rural	Poorer	Unimproved source of drinking water	Unimproved
1649	Male	35-54 years	Higher	Never married/never lived together	35-54 years	Western	Urban	Richest	Improved source of drinking water	Unimproved
1650	Male	35-54 years	Higher	Never married/never lived together	35-54 years	Western	Urban	Richest	Improved source of drinking water	Unimproved
1651	Male	35-54 years	Middle/JSS/JHS	Never married/never lived together	35-54 years	Volta	Rural	Poorer	Unimproved source of drinking water	Unimproved
1652	Male	35-54 years	Middle/JSS/JHS	Never married/never lived together	35-54 years	Volta	Rural	Poorer	Unimproved source of drinking water	Unimproved
1653	Male	35-54 years	Secondary/SSS/SHS	Never married/never lived together	35-54 years	Volta	Urban	Richer	Improved source of drinking water	Unimproved
1654	Male	35-54 years	Middle/JSS/JHS	Never married/never lived together	35-54 years	Greater Accra	Urban	Richer	Improved source of drinking water	Unimproved
1655	Male	35-54 years	Primary	Never married/never lived together	35-54 years	Eastern	Rural	Poorer	Improved source of drinking water	Unimproved
1656	Male	35-54 years	No education/preschool	Never married/never lived together	35-54 years	Brong Ahafo	Urban	Poorer	Improved source of drinking water	Unimproved
1657	Male	35-54 years	Secondary/SSS/SHS	Never married/never lived together	35-54 years	Upper East	Urban	Middle	Improved source of drinking water	Unimproved
1658	Male	35-54 years	Primary	Never married/never lived together	35-54 years	Northern	Rural	Middle	Improved source of drinking water	Unimproved
1659	Male	35-54 years	Middle/JSS/JHS	Never married/never lived together	35-54 years	Ashanti	Urban	Middle	Improved source of drinking water	Unimproved
1660	Male	35-54 years	Secondary/SSS/SHS	Never married/never lived together	35-54 years	Eastern	Urban	Richer	Improved source of drinking water	Improved
1661	Male	35-54 years	Primary	Never married/never lived together	35-54 years	Brong Ahafo	Urban	Richer	Improved source of drinking water	Unimproved
1662	Male	35-54 years	Middle/JSS/JHS	Never married/never lived together	35-54 years	Volta	Rural	Poorer	Improved source of drinking water	Unimproved
1663	Male	35-54 years	Higher	Never married/never lived together	35-54 years	Ashanti	Urban	Richest	Improved source of drinking water	Unimproved
1664	Male	35-54 years	Middle/JSS/JHS	Never married/never lived together	35-54 years	Greater Accra	Urban	Middle	Improved source of drinking water	Unimproved
1665	Male	35-54 years	Middle/JSS/JHS	Never married/never lived together	35-54 years	Central	Urban	Richest	Improved source of drinking water	Unimproved
1666	Male	35-54 years	Middle/JSS/JHS	Never married/never lived together	35-54 years	Western	Rural	Middle	Improved source of drinking water	Improved
1667	Male	35-54 years	Middle/JSS/JHS	Never married/never lived together	35-54 years	Ashanti	Urban	Richer	Improved source of drinking water	Unimproved
1668	Male	35-54 years	Higher	Never married/never lived together	35-54 years	Ashanti	Urban	Richest	Improved source of drinking water	Unimproved
1669	Male	35-54 years	Primary	Never married/never lived together	35-54 years	Eastern	Rural	Poorest	Unimproved source of drinking water	Unimproved
1670	Male	35-54 years	Middle/JSS/JHS	Never married/never lived together	35-54 years	Central	Rural	Middle	Improved source of drinking water	Unimproved
1671	Male	35-54 years	Secondary/SSS/SHS	Never married/never lived together	35-54 years	Eastern	Urban	Richer	Improved source of drinking water	Unimproved
1672	Male	35-54 years	Secondary/SSS/SHS	Never married/never lived together	35-54 years	Ashanti	Urban	Richest	Improved source of drinking water	Improved
1673	Male	35-54 years	Middle/JSS/JHS	Never married/never lived together	35-54 years	Ashanti	Urban	Richest	Improved source of drinking water	Unimproved
1674	Male	35-54 years	Secondary/SSS/SHS	Never married/never lived together	35-54 years	Greater Accra	Urban	Richest	Improved source of drinking water	Unimproved
1675	Male	35-54 years	Secondary/SSS/SHS	Never married/never lived together	35-54 years	Greater Accra	Urban	Richest	Improved source of drinking water	Unimproved
1676	Male	35-54 years	Secondary/SSS/SHS	Never married/never lived together	35-54 years	Greater Accra	Urban	Richest	Improved source of drinking water	Unimproved
1677	Male	35-54 years	Secondary/SSS/SHS	Never married/never lived together	35-54 years	Greater Accra	Urban	Richest	Improved source of drinking water	Unimproved
1678	Male	35-54 years	Primary	Never married/never lived together	35-54 years	Northern	Rural	Middle	Improved source of drinking water	Unimproved
1679	Male	35-54 years	Middle/JSS/JHS	Never married/never lived together	35-54 years	Central	Urban	Middle	Improved source of drinking water	Unimproved
1680	Male	35-54 years	Higher	Never married/never lived together	35-54 years	Volta	Rural	Richer	Unimproved source of drinking water	Unimproved
1681	Male	35-54 years	Secondary/SSS/SHS	Never married/never lived together	35-54 years	Upper East	Urban	Middle	Improved source of drinking water	Unimproved
1682	Male	35-54 years	Middle/JSS/JHS	Never married/never lived together	35-54 years	Brong Ahafo	Rural	Middle	Improved source of drinking water	Unimproved
1683	Male	35-54 years	Middle/JSS/JHS	Never married/never lived together	35-54 years	Ashanti	Urban	Poorest	Unimproved source of drinking water	Unimproved
1684	Male	35-54 years	No education/preschool	Never married/never lived together	35-54 years	Upper West	Rural	Poorest	Unimproved source of drinking water	Unimproved
1685	Male	35-54 years	Higher	Never married/never lived together	35-54 years	Western	Urban	Richest	Improved source of drinking water	Improved
1686	Male	35-54 years	No education/preschool	Never married/never lived together	35-54 years	Central	Urban	Richer	Improved source of drinking water	Unimproved
1687	Male	35-54 years	Primary	Never married/never lived together	35-54 years	Western	Urban	Richer	Improved source of drinking water	Unimproved
1688	Male	35-54 years	Secondary/SSS/SHS	Never married/never lived together	35-54 years	Western	Urban	Richest	Improved source of drinking water	Unimproved
1689	Male	35-54 years	Higher	Never married/never lived together	35-54 years	Western	Urban	Richest	Improved source of drinking water	Unimproved
1690	Male	35-54 years	Middle/JSS/JHS	Never married/never lived together	35-54 years	Greater Accra	Urban	Richer	Improved source of drinking water	Unimproved
1691	Male	35-54 years	Middle/JSS/JHS	Never married/never lived together	35-54 years	Greater Accra	Urban	Richer	Improved source of drinking water	Unimproved
1692	Male	35-54 years	Middle/JSS/JHS	Never married/never lived together	35-54 years	Central	Urban	Richer	Improved source of drinking water	Unimproved
1693	Male	35-54 years	Secondary/SSS/SHS	Never married/never lived together	35-54 years	Volta	Rural	Middle	Improved source of drinking water	Unimproved
1694	Male	35-54 years	Higher	Never married/never lived together	35-54 years	Greater Accra	Urban	Richest	Improved source of drinking water	Unimproved
1695	Male	35-54 years	Higher	Never married/never lived together	35-54 years	Greater Accra	Urban	Richest	Improved source of drinking water	Improved
1696	Male	35-54 years	No education/preschool	Never married/never lived together	35-54 years	Eastern	Rural	Middle	Improved source of drinking water	Unimproved
1697	Male	35-54 years	Higher	Never married/never lived together	35-54 years	Eastern	Urban	Richest	Improved source of drinking water	Unimproved
1698	Male	35-54 years	Higher	Never married/never lived together	35-54 years	Eastern	Urban	Richest	Improved source of drinking water	Improved
1699	Male	35-54 years	Primary	Never married/never lived together	35-54 years	Brong Ahafo	Rural	Poorest	Improved source of drinking water	Unimproved
1700	Male	35-54 years	Secondary/SSS/SHS	Never married/never lived together	35-54 years	Greater Accra	Urban	Richest	Improved source of drinking water	Unimproved
1701	Male	35-54 years	Secondary/SSS/SHS	Never married/never lived together	35-54 years	Greater Accra	Urban	Richest	Improved source of drinking water	Unimproved
1702	Male	35-54 years	Middle/JSS/JHS	Never married/never lived together	35-54 years	Volta	Rural	Middle	Improved source of drinking water	Unimproved
1703	Male	35-54 years	Secondary/SSS/SHS	Never married/never lived together	35-54 years	Greater Accra	Urban	Richest	Improved source of drinking water	Improved
1704	Male	35-54 years	Secondary/SSS/SHS	Never married/never lived together	35-54 years	Brong Ahafo	Rural	Poorer	Unimproved source of drinking water	Unimproved
1705	Male	35-54 years	Secondary/SSS/SHS	Never married/never lived together	35-54 years	Greater Accra	Urban	Richest	Improved source of drinking water	Unimproved
1706	Male	35-54 years	Secondary/SSS/SHS	Never married/never lived together	35-54 years	Ashanti	Urban	Richest	Improved source of drinking water	Unimproved
1707	Male	35-54 years	Secondary/SSS/SHS	Never married/never lived together	35-54 years	Eastern	Rural	Poorer	Improved source of drinking water	Unimproved
1708	Male	35-54 years	Middle/JSS/JHS	Never married/never lived together	35-54 years	Ashanti	Rural	Middle	Unimproved source of drinking water	Unimproved
1709	Male	35-54 years	Middle/JSS/JHS	Never married/never lived together	35-54 years	Western	Urban	Richest	Improved source of drinking water	Unimproved
1710	Male	35-54 years	Middle/JSS/JHS	Never married/never lived together	35-54 years	Greater Accra	Urban	Richer	Improved source of drinking water	Unimproved
1711	Male	35-54 years	Middle/JSS/JHS	Never married/never lived together	35-54 years	Greater Accra	Urban	Richer	Improved source of drinking water	Unimproved
1712	Male	35-54 years	Secondary/SSS/SHS	Never married/never lived together	35-54 years	Western	Rural	Middle	Improved source of drinking water	Unimproved
1713	Male	35-54 years	Middle/JSS/JHS	Never married/never lived together	35-54 years	Ashanti	Urban	Richest	Improved source of drinking water	Unimproved
1714	Male	35-54 years	Secondary/SSS/SHS	Never married/never lived together	35-54 years	Central	Urban	Richer	Improved source of drinking water	Unimproved
1715	Male	35-54 years	Middle/JSS/JHS	Never married/never lived together	35-54 years	Central	Urban	Richest	Improved source of drinking water	Unimproved
1716	Male	35-54 years	Higher	Never married/never lived together	35-54 years	Central	Urban	Richest	Improved source of drinking water	Improved
1717	Male	35-54 years	No education/preschool	Never married/never lived together	35-54 years	Upper West	Urban	Poorer	Improved source of drinking water	Unimproved
1718	Male	35-54 years	Middle/JSS/JHS	Never married/never lived together	35-54 years	Greater Accra	Urban	Richest	Improved source of drinking water	Improved
1719	Male	35-54 years	Middle/JSS/JHS	Never married/never lived together	35-54 years	Greater Accra	Urban	Richest	Improved source of drinking water	Unimproved
1720	Male	35-54 years	Higher	Never married/never lived together	35-54 years	Greater Accra	Urban	Richest	Improved source of drinking water	Improved
1721	Male	35-54 years	Middle/JSS/JHS	Never married/never lived together	35-54 years	Volta	Rural	Poorer	Improved source of drinking water	Unimproved
1722	Male	35-54 years	Middle/JSS/JHS	Never married/never lived together	35-54 years	Western	Urban	Richer	Improved source of drinking water	Unimproved
1723	Male	35-54 years	No education/preschool	Never married/never lived together	35-54 years	Greater Accra	Urban	Richest	Improved source of drinking water	Improved
1724	Male	35-54 years	Middle/JSS/JHS	Never married/never lived together	35-54 years	Greater Accra	Urban	Middle	Improved source of drinking water	Unimproved
1725	Male	35-54 years	Middle/JSS/JHS	Never married/never lived together	35-54 years	Volta	Urban	Richer	Improved source of drinking water	Unimproved
1726	Male	35-54 years	Primary	Never married/never lived together	35-54 years	Volta	Urban	Richer	Improved source of drinking water	Improved
1727	Male	35-54 years	Middle/JSS/JHS	Never married/never lived together	35-54 years	Volta	Urban	Richer	Improved source of drinking water	Unimproved
1728	Male	35-54 years	No education/preschool	Never married/never lived together	35-54 years	Northern	Rural	Poorest	Improved source of drinking water	Unimproved
1729	Male	35-54 years	Primary	Never married/never lived together	35-54 years	Western	Rural	Poorer	Improved source of drinking water	Unimproved
1730	Male	35-54 years	Primary	Never married/never lived together	35-54 years	Ashanti	Urban	Richer	Improved source of drinking water	Unimproved
1731	Male	35-54 years	Middle/JSS/JHS	Never married/never lived together	35-54 years	Ashanti	Urban	Richest	Improved source of drinking water	Unimproved
1732	Male	35-54 years	Secondary/SSS/SHS	Never married/never lived together	35-54 years	Upper West	Urban	Richer	Improved source of drinking water	Unimproved
1733	Female	55 years plus	Higher	Never married/never lived together	55 years plus	Greater Accra	Rural	Richest	Improved source of drinking water	Improved
1734	Female	55 years plus	Middle/JSS/JHS	Never married/never lived together	55 years plus	Volta	Rural	Poorer	Improved source of drinking water	Unimproved
1735	Female	55 years plus	No education/preschool	Never married/never lived together	55 years plus	Greater Accra	Urban	Poorer	Improved source of drinking water	Unimproved
1736	Female	55 years plus	Secondary/SSS/SHS	Never married/never lived together	55 years plus	Eastern	Urban	Middle	Improved source of drinking water	Unimproved
1737	Female	55 years plus	Primary	Never married/never lived together	55 years plus	Greater Accra	Urban	Middle	Improved source of drinking water	Unimproved
1738	Female	55 years plus	Middle/JSS/JHS	Never married/never lived together	55 years plus	Eastern	Urban	Middle	Improved source of drinking water	Improved
1739	Female	55 years plus	Secondary/SSS/SHS	Never married/never lived together	55 years plus	Greater Accra	Urban	Richest	Improved source of drinking water	Improved
1740	Female	55 years plus	Middle/JSS/JHS	Never married/never lived together	55 years plus	Ashanti	Urban	Richest	Improved source of drinking water	Unimproved
1741	Male	55 years plus	Middle/JSS/JHS	Never married/never lived together	55 years plus	Ashanti	Urban	Middle	Improved source of drinking water	Unimproved
1742	Male	55 years plus	Secondary/SSS/SHS	Never married/never lived together	55 years plus	Ashanti	Urban	Middle	Improved source of drinking water	Unimproved
1743	Male	55 years plus	Middle/JSS/JHS	Never married/never lived together	55 years plus	Volta	Urban	Poorest	Improved source of drinking water	Unimproved
1744	Male	55 years plus	Primary	Never married/never lived together	55 years plus	Brong Ahafo	Rural	Poorer	Improved source of drinking water	Unimproved
1745	Male	55 years plus	No education/preschool	Never married/never lived together	55 years plus	Brong Ahafo	Rural	Poorer	Unimproved source of drinking water	Unimproved
1746	Male	55 years plus	No education/preschool	Never married/never lived together	55 years plus	Greater Accra	Rural	Poorer	Improved source of drinking water	Unimproved
1747	Male	55 years plus	No education/preschool	Never married/never lived together	55 years plus	Volta	Rural	Poorer	Unimproved source of drinking water	Unimproved
1748	Male	55 years plus	Middle/JSS/JHS	Never married/never lived together	55 years plus	Eastern	Rural	Poorer	Unimproved source of drinking water	Unimproved
1749	Male	55 years plus	Higher	Never married/never lived together	55 years plus	Greater Accra	Urban	Richest	Improved source of drinking water	Unimproved
1750	Male	55 years plus	Middle/JSS/JHS	Never married/never lived together	55 years plus	Central	Urban	Poorer	Improved source of drinking water	Unimproved
1751	Male	55 years plus	No education/preschool	Never married/never lived together	55 years plus	Northern	Urban	Poorest	Improved source of drinking water	Unimproved
1752	Male	55 years plus	No education/preschool	Never married/never lived together	55 years plus	Upper East	Rural	Poorest	Improved source of drinking water	Unimproved
1753	Male	55 years plus	Secondary/SSS/SHS	Never married/never lived together	55 years plus	Volta	Rural	Poorer	Improved source of drinking water	Unimproved
1754	Male	55 years plus	Middle/JSS/JHS	Never married/never lived together	55 years plus	Volta	Rural	Middle	Improved source of drinking water	Improved
1755	Male	55 years plus	No education/preschool	Never married/never lived together	55 years plus	Northern	Rural	Poorest	Improved source of drinking water	Unimproved
1756	Male	55 years plus	Primary	Never married/never lived together	55 years plus	Greater Accra	Urban	Richer	Improved source of drinking water	Unimproved
1757	Female	15-34 years	No education/preschool	Currently married	15-34 years	Western	Rural	Middle	Improved source of drinking water	Unimproved
1758	Female	15-34 years	Middle/JSS/JHS	Currently married	15-34 years	Western	Rural	Richer	Improved source of drinking water	Unimproved
1759	Female	15-34 years	Primary	Currently married	15-34 years	Central	Rural	Poorer	Improved source of drinking water	Unimproved
1760	Female	15-34 years	Middle/JSS/JHS	Currently married	15-34 years	Central	Rural	Middle	Improved source of drinking water	Unimproved
1761	Female	15-34 years	Primary	Currently married	15-34 years	Central	Rural	Poorer	Improved source of drinking water	Unimproved
1762	Female	15-34 years	Middle/JSS/JHS	Currently married	15-34 years	Central	Urban	Richer	Improved source of drinking water	Unimproved
1763	Female	15-34 years	Secondary/SSS/SHS	Currently married	15-34 years	Central	Urban	Richer	Improved source of drinking water	Unimproved
1764	Female	15-34 years	Middle/JSS/JHS	Currently married	15-34 years	Central	Urban	Richer	Improved source of drinking water	Unimproved
1765	Female	15-34 years	No education/preschool	Currently married	15-34 years	Volta	Rural	Middle	Improved source of drinking water	Unimproved
1766	Female	15-34 years	No education/preschool	Currently married	15-34 years	Brong Ahafo	Rural	Poorer	Improved source of drinking water	Unimproved
1767	Female	15-34 years	Primary	Currently married	15-34 years	Brong Ahafo	Rural	Poorer	Improved source of drinking water	Unimproved
1768	Female	15-34 years	Middle/JSS/JHS	Currently married	15-34 years	Brong Ahafo	Rural	Poorer	Improved source of drinking water	Unimproved
1769	Female	15-34 years	Primary	Currently married	15-34 years	Brong Ahafo	Urban	Middle	Improved source of drinking water	Unimproved
1770	Female	15-34 years	Secondary/SSS/SHS	Currently married	15-34 years	Brong Ahafo	Urban	Richer	Improved source of drinking water	Unimproved
1771	Female	15-34 years	Primary	Currently married	15-34 years	Brong Ahafo	Urban	Poorer	Improved source of drinking water	Unimproved
1772	Female	15-34 years	Secondary/SSS/SHS	Currently married	15-34 years	Brong Ahafo	Urban	Middle	Improved source of drinking water	Unimproved
1773	Female	15-34 years	Secondary/SSS/SHS	Currently married	15-34 years	Northern	Urban	Richer	Improved source of drinking water	Unimproved
1774	Female	15-34 years	Secondary/SSS/SHS	Currently married	15-34 years	Northern	Urban	Richer	Improved source of drinking water	Unimproved
1775	Female	15-34 years	Primary	Currently married	15-34 years	Brong Ahafo	Rural	Poorer	Improved source of drinking water	Unimproved
1776	Female	15-34 years	Higher	Currently married	15-34 years	Brong Ahafo	Urban	Richest	Improved source of drinking water	Improved
1777	Female	15-34 years	No education/preschool	Currently married	15-34 years	Ashanti	Rural	Poorest	Unimproved source of drinking water	Unimproved
1778	Female	15-34 years	Middle/JSS/JHS	Currently married	15-34 years	Brong Ahafo	Urban	Richer	Improved source of drinking water	Unimproved
1779	Female	15-34 years	Primary	Currently married	15-34 years	Eastern	Rural	Poorer	Unimproved source of drinking water	Unimproved
1780	Female	15-34 years	Higher	Currently married	15-34 years	Ashanti	Urban	Richer	Improved source of drinking water	Unimproved
1781	Female	15-34 years	Middle/JSS/JHS	Currently married	15-34 years	Ashanti	Urban	Richest	Improved source of drinking water	Improved
1782	Female	15-34 years	Secondary/SSS/SHS	Currently married	15-34 years	Brong Ahafo	Rural	Middle	Improved source of drinking water	Unimproved
1783	Female	15-34 years	No education/preschool	Currently married	15-34 years	Volta	Rural	Poorer	Improved source of drinking water	Unimproved
1784	Female	15-34 years	No education/preschool	Currently married	15-34 years	Eastern	Rural	Poorest	Unimproved source of drinking water	Unimproved
1785	Female	15-34 years	No education/preschool	Currently married	15-34 years	Eastern	Rural	Poorer	Unimproved source of drinking water	Unimproved
1786	Female	15-34 years	Middle/JSS/JHS	Currently married	15-34 years	Eastern	Rural	Poorest	Unimproved source of drinking water	Unimproved
1787	Female	15-34 years	Middle/JSS/JHS	Currently married	15-34 years	Central	Urban	Middle	Improved source of drinking water	Unimproved
1788	Female	15-34 years	No education/preschool	Currently married	15-34 years	Central	Rural	Poorer	Unimproved source of drinking water	Unimproved
1789	Female	15-34 years	Higher	Currently married	15-34 years	Western	Urban	Richer	Improved source of drinking water	Unimproved
1790	Female	15-34 years	Higher	Currently married	15-34 years	Northern	Urban	Middle	Improved source of drinking water	Unimproved
1791	Female	15-34 years	No education/preschool	Currently married	15-34 years	Northern	Urban	Middle	Improved source of drinking water	Unimproved
1792	Female	15-34 years	Middle/JSS/JHS	Currently married	15-34 years	Eastern	Urban	Richer	Improved source of drinking water	Unimproved
1793	Female	15-34 years	Secondary/SSS/SHS	Currently married	15-34 years	Eastern	Urban	Middle	Improved source of drinking water	Unimproved
1794	Female	15-34 years	Middle/JSS/JHS	Currently married	15-34 years	Eastern	Urban	Middle	Improved source of drinking water	Unimproved
1795	Female	15-34 years	Primary	Currently married	15-34 years	Eastern	Urban	Middle	Improved source of drinking water	Unimproved
1796	Female	15-34 years	Middle/JSS/JHS	Currently married	15-34 years	Eastern	Urban	Middle	Improved source of drinking water	Unimproved
1797	Female	15-34 years	Middle/JSS/JHS	Currently married	15-34 years	Volta	Urban	Middle	Improved source of drinking water	Unimproved
1798	Female	15-34 years	Middle/JSS/JHS	Currently married	15-34 years	Brong Ahafo	Rural	Poorer	Improved source of drinking water	Unimproved
1799	Female	15-34 years	Middle/JSS/JHS	Currently married	15-34 years	Brong Ahafo	Rural	Middle	Improved source of drinking water	Unimproved
1800	Female	15-34 years	No education/preschool	Currently married	15-34 years	Brong Ahafo	Rural	Poorer	Improved source of drinking water	Unimproved
1801	Female	15-34 years	Secondary/SSS/SHS	Currently married	15-34 years	Volta	Urban	Richest	Improved source of drinking water	Unimproved
1802	Female	15-34 years	No education/preschool	Currently married	15-34 years	Central	Rural	Middle	Improved source of drinking water	Unimproved
1803	Female	15-34 years	Middle/JSS/JHS	Currently married	15-34 years	Western	Rural	Middle	Improved source of drinking water	Unimproved
1804	Female	15-34 years	No education/preschool	Currently married	15-34 years	Western	Rural	Richer	Improved source of drinking water	Unimproved
1805	Female	15-34 years	Middle/JSS/JHS	Currently married	15-34 years	Western	Rural	Middle	Improved source of drinking water	Unimproved
1806	Female	15-34 years	Primary	Currently married	15-34 years	Volta	Rural	Poorer	Unimproved source of drinking water	Unimproved
1807	Female	15-34 years	Middle/JSS/JHS	Currently married	15-34 years	Eastern	Rural	Poorer	Improved source of drinking water	Unimproved
1808	Female	15-34 years	Higher	Currently married	15-34 years	Upper West	Urban	Richer	Improved source of drinking water	Unimproved
1809	Female	15-34 years	Middle/JSS/JHS	Currently married	15-34 years	Brong Ahafo	Rural	Poorer	Improved source of drinking water	Unimproved
1810	Female	15-34 years	Middle/JSS/JHS	Currently married	15-34 years	Ashanti	Urban	Middle	Improved source of drinking water	Unimproved
1811	Female	15-34 years	Primary	Currently married	15-34 years	Ashanti	Urban	Middle	Improved source of drinking water	Unimproved
1812	Female	15-34 years	Primary	Currently married	15-34 years	Western	Rural	Poorer	Improved source of drinking water	Unimproved
1813	Female	15-34 years	No education/preschool	Currently married	15-34 years	Brong Ahafo	Urban	Richer	Improved source of drinking water	Unimproved
1814	Female	15-34 years	No education/preschool	Currently married	15-34 years	Brong Ahafo	Urban	Poorer	Improved source of drinking water	Unimproved
1815	Female	15-34 years	No education/preschool	Currently married	15-34 years	Brong Ahafo	Urban	Poorest	Improved source of drinking water	Unimproved
1816	Female	15-34 years	Secondary/SSS/SHS	Currently married	15-34 years	Western	Urban	Richest	Improved source of drinking water	Unimproved
1817	Female	15-34 years	Primary	Currently married	15-34 years	Western	Urban	Middle	Improved source of drinking water	Unimproved
1818	Female	15-34 years	Middle/JSS/JHS	Currently married	15-34 years	Western	Urban	Richer	Improved source of drinking water	Unimproved
1819	Female	15-34 years	Middle/JSS/JHS	Currently married	15-34 years	Western	Urban	Middle	Improved source of drinking water	Unimproved
1820	Female	15-34 years	Middle/JSS/JHS	Currently married	15-34 years	Eastern	Rural	Middle	Improved source of drinking water	Unimproved
1821	Female	15-34 years	Middle/JSS/JHS	Currently married	15-34 years	Eastern	Rural	Middle	Improved source of drinking water	Unimproved
1822	Female	15-34 years	Middle/JSS/JHS	Currently married	15-34 years	Eastern	Rural	Middle	Improved source of drinking water	Unimproved
1823	Female	15-34 years	Middle/JSS/JHS	Currently married	15-34 years	Western	Rural	Poorer	Unimproved source of drinking water	Unimproved
1824	Female	15-34 years	Middle/JSS/JHS	Currently married	15-34 years	Western	Rural	Poorer	Improved source of drinking water	Unimproved
1825	Female	15-34 years	Middle/JSS/JHS	Currently married	15-34 years	Ashanti	Urban	Richest	Improved source of drinking water	Unimproved
1826	Female	15-34 years	Primary	Currently married	15-34 years	Ashanti	Rural	Poorer	Improved source of drinking water	Unimproved
1827	Female	15-34 years	Primary	Currently married	15-34 years	Upper West	Urban	Middle	Improved source of drinking water	Unimproved
1828	Female	15-34 years	Secondary/SSS/SHS	Currently married	15-34 years	Northern	Urban	Richer	Improved source of drinking water	Unimproved
1829	Female	15-34 years	Middle/JSS/JHS	Currently married	15-34 years	Eastern	Urban	Middle	Unimproved source of drinking water	Unimproved
1830	Female	15-34 years	Middle/JSS/JHS	Currently married	15-34 years	Brong Ahafo	Urban	Middle	Improved source of drinking water	Unimproved
1831	Female	15-34 years	Middle/JSS/JHS	Currently married	15-34 years	Western	Urban	Richest	Improved source of drinking water	Unimproved
1832	Female	15-34 years	Higher	Currently married	15-34 years	Western	Urban	Richest	Improved source of drinking water	Unimproved
1833	Female	15-34 years	Higher	Currently married	15-34 years	Brong Ahafo	Rural	Middle	Improved source of drinking water	Unimproved
1834	Female	15-34 years	Secondary/SSS/SHS	Currently married	15-34 years	Greater Accra	Urban	Richest	Improved source of drinking water	Unimproved
1835	Female	15-34 years	Middle/JSS/JHS	Currently married	15-34 years	Ashanti	Rural	Poorest	Improved source of drinking water	Unimproved
1836	Female	15-34 years	Middle/JSS/JHS	Currently married	15-34 years	Ashanti	Urban	Richer	Improved source of drinking water	Unimproved
1837	Female	15-34 years	Secondary/SSS/SHS	Currently married	15-34 years	Central	Urban	Middle	Improved source of drinking water	Unimproved
1838	Female	15-34 years	No education/preschool	Currently married	15-34 years	Upper West	Rural	Poorest	Improved source of drinking water	Unimproved
1839	Female	15-34 years	No education/preschool	Currently married	15-34 years	Northern	Rural	Poorest	Improved source of drinking water	Unimproved
1840	Female	15-34 years	No education/preschool	Currently married	15-34 years	Northern	Rural	Poorest	Improved source of drinking water	Unimproved
1841	Female	15-34 years	Higher	Currently married	15-34 years	Greater Accra	Urban	Richest	Improved source of drinking water	Unimproved
1842	Female	15-34 years	Middle/JSS/JHS	Currently married	15-34 years	Volta	Rural	Poorer	Improved source of drinking water	Unimproved
1843	Female	15-34 years	Middle/JSS/JHS	Currently married	15-34 years	Brong Ahafo	Urban	Richer	Improved source of drinking water	Unimproved
1844	Female	15-34 years	Primary	Currently married	15-34 years	Volta	Urban	Middle	Improved source of drinking water	Unimproved
1845	Female	15-34 years	Middle/JSS/JHS	Currently married	15-34 years	Volta	Urban	Middle	Improved source of drinking water	Unimproved
1846	Female	15-34 years	Middle/JSS/JHS	Currently married	15-34 years	Volta	Rural	Poorest	Improved source of drinking water	Unimproved
1847	Female	15-34 years	Middle/JSS/JHS	Currently married	15-34 years	Upper West	Urban	Middle	Improved source of drinking water	Unimproved
1848	Female	15-34 years	Higher	Currently married	15-34 years	Upper West	Urban	Middle	Improved source of drinking water	Unimproved
1849	Female	15-34 years	Higher	Currently married	15-34 years	Eastern	Rural	Richer	Improved source of drinking water	Unimproved
1850	Female	15-34 years	Middle/JSS/JHS	Currently married	15-34 years	Eastern	Rural	Middle	Improved source of drinking water	Unimproved
1851	Female	15-34 years	Middle/JSS/JHS	Currently married	15-34 years	Western	Urban	Richest	Improved source of drinking water	Unimproved
1852	Female	15-34 years	Middle/JSS/JHS	Currently married	15-34 years	Ashanti	Urban	Richest	Improved source of drinking water	Unimproved
1853	Female	15-34 years	Middle/JSS/JHS	Currently married	15-34 years	Eastern	Urban	Richest	Improved source of drinking water	Improved
1854	Female	15-34 years	Middle/JSS/JHS	Currently married	15-34 years	Eastern	Urban	Richest	Improved source of drinking water	Improved
1855	Female	15-34 years	Secondary/SSS/SHS	Currently married	15-34 years	Eastern	Urban	Richest	Improved source of drinking water	Unimproved
1856	Female	15-34 years	Secondary/SSS/SHS	Currently married	15-34 years	Eastern	Urban	Richest	Improved source of drinking water	Unimproved
1857	Female	15-34 years	Middle/JSS/JHS	Currently married	15-34 years	Eastern	Urban	Richest	Improved source of drinking water	Unimproved
1858	Female	15-34 years	Middle/JSS/JHS	Currently married	15-34 years	Eastern	Urban	Richer	Improved source of drinking water	Unimproved
1859	Female	15-34 years	Middle/JSS/JHS	Currently married	15-34 years	Eastern	Urban	Richest	Improved source of drinking water	Improved
1860	Female	15-34 years	Middle/JSS/JHS	Currently married	15-34 years	Eastern	Rural	Poorer	Improved source of drinking water	Unimproved
1861	Female	15-34 years	Higher	Currently married	15-34 years	Central	Rural	Richer	Improved source of drinking water	Unimproved
1862	Female	15-34 years	Middle/JSS/JHS	Currently married	15-34 years	Brong Ahafo	Urban	Richer	Improved source of drinking water	Unimproved
1863	Female	15-34 years	Primary	Currently married	15-34 years	Greater Accra	Rural	Poorer	Unimproved source of drinking water	Unimproved
1864	Female	15-34 years	Middle/JSS/JHS	Currently married	15-34 years	Brong Ahafo	Urban	Richer	Improved source of drinking water	Unimproved
1865	Female	15-34 years	Secondary/SSS/SHS	Currently married	15-34 years	Brong Ahafo	Urban	Richest	Improved source of drinking water	Unimproved
1866	Female	15-34 years	Secondary/SSS/SHS	Currently married	15-34 years	Brong Ahafo	Urban	Richest	Improved source of drinking water	Unimproved
1867	Female	15-34 years	Primary	Currently married	15-34 years	Central	Urban	Richer	Improved source of drinking water	Unimproved
1868	Female	15-34 years	No education/preschool	Currently married	15-34 years	Central	Urban	Richer	Improved source of drinking water	Unimproved
1869	Female	15-34 years	Middle/JSS/JHS	Currently married	15-34 years	Brong Ahafo	Urban	Middle	Improved source of drinking water	Unimproved
1870	Female	15-34 years	Secondary/SSS/SHS	Currently married	15-34 years	Brong Ahafo	Urban	Richest	Improved source of drinking water	Unimproved
1871	Female	15-34 years	Middle/JSS/JHS	Currently married	15-34 years	Central	Rural	Middle	Improved source of drinking water	Unimproved
1872	Female	15-34 years	Higher	Currently married	15-34 years	Central	Rural	Richer	Improved source of drinking water	Unimproved
1873	Female	15-34 years	Higher	Currently married	15-34 years	Eastern	Urban	Richest	Improved source of drinking water	Unimproved
1874	Female	15-34 years	Middle/JSS/JHS	Currently married	15-34 years	Eastern	Urban	Richer	Improved source of drinking water	Unimproved
1875	Female	15-34 years	Primary	Currently married	15-34 years	Brong Ahafo	Rural	Poorer	Unimproved source of drinking water	Unimproved
1876	Female	15-34 years	Middle/JSS/JHS	Currently married	15-34 years	Western	Urban	Middle	Improved source of drinking water	Unimproved
1877	Female	15-34 years	Higher	Currently married	15-34 years	Western	Urban	Richer	Improved source of drinking water	Unimproved
1878	Female	15-34 years	Primary	Currently married	15-34 years	Western	Urban	Middle	Improved source of drinking water	Unimproved
1879	Female	15-34 years	Middle/JSS/JHS	Currently married	15-34 years	Brong Ahafo	Rural	Poorer	Improved source of drinking water	Unimproved
1880	Female	15-34 years	Middle/JSS/JHS	Currently married	15-34 years	Brong Ahafo	Rural	Middle	Improved source of drinking water	Unimproved
1881	Female	15-34 years	Secondary/SSS/SHS	Currently married	15-34 years	Greater Accra	Urban	Richest	Improved source of drinking water	Improved
1882	Female	15-34 years	Primary	Currently married	15-34 years	Greater Accra	Urban	Richest	Improved source of drinking water	Improved
1883	Female	15-34 years	Higher	Currently married	15-34 years	Greater Accra	Urban	Richest	Improved source of drinking water	Improved
1884	Female	15-34 years	Primary	Currently married	15-34 years	Western	Rural	Poorer	Improved source of drinking water	Unimproved
1885	Female	15-34 years	Middle/JSS/JHS	Currently married	15-34 years	Western	Rural	Middle	Improved source of drinking water	Unimproved
1886	Female	15-34 years	Primary	Currently married	15-34 years	Upper West	Urban	Richer	Improved source of drinking water	Unimproved
1887	Female	15-34 years	Primary	Currently married	15-34 years	Upper West	Urban	Poorer	Improved source of drinking water	Unimproved
1888	Female	15-34 years	Middle/JSS/JHS	Currently married	15-34 years	Western	Rural	Richer	Improved source of drinking water	Unimproved
1889	Female	15-34 years	Middle/JSS/JHS	Currently married	15-34 years	Western	Rural	Middle	Improved source of drinking water	Unimproved
1890	Female	15-34 years	Primary	Currently married	15-34 years	Ashanti	Rural	Poorer	Improved source of drinking water	Unimproved
1891	Female	15-34 years	Primary	Currently married	15-34 years	Greater Accra	Urban	Middle	Improved source of drinking water	Unimproved
1892	Female	15-34 years	Higher	Currently married	15-34 years	Western	Urban	Richest	Improved source of drinking water	Unimproved
1893	Female	15-34 years	Middle/JSS/JHS	Currently married	15-34 years	Brong Ahafo	Urban	Middle	Improved source of drinking water	Unimproved
1894	Female	15-34 years	Higher	Currently married	15-34 years	Greater Accra	Rural	Richest	Improved source of drinking water	Improved
1895	Female	15-34 years	Higher	Currently married	15-34 years	Brong Ahafo	Rural	Middle	Improved source of drinking water	Unimproved
1896	Female	15-34 years	Higher	Currently married	15-34 years	Central	Urban	Richest	Improved source of drinking water	Unimproved
1897	Female	15-34 years	Higher	Currently married	15-34 years	Greater Accra	Urban	Richest	Improved source of drinking water	Improved
1898	Female	15-34 years	Secondary/SSS/SHS	Currently married	15-34 years	Western	Rural	Richer	Improved source of drinking water	Unimproved
1899	Female	15-34 years	Middle/JSS/JHS	Currently married	15-34 years	Eastern	Urban	Richest	Improved source of drinking water	Improved
1900	Female	15-34 years	Secondary/SSS/SHS	Currently married	15-34 years	Brong Ahafo	Rural	Middle	Improved source of drinking water	Unimproved
1901	Female	15-34 years	Middle/JSS/JHS	Currently married	15-34 years	Brong Ahafo	Rural	Middle	Improved source of drinking water	Unimproved
1902	Female	15-34 years	Middle/JSS/JHS	Currently married	15-34 years	Ashanti	Urban	Richer	Improved source of drinking water	Unimproved
1903	Female	15-34 years	Middle/JSS/JHS	Currently married	15-34 years	Ashanti	Urban	Richer	Improved source of drinking water	Unimproved
1904	Female	15-34 years	Middle/JSS/JHS	Currently married	15-34 years	Brong Ahafo	Rural	Middle	Improved source of drinking water	Unimproved
1905	Female	15-34 years	Middle/JSS/JHS	Currently married	15-34 years	Brong Ahafo	Rural	Middle	Improved source of drinking water	Unimproved
1906	Female	15-34 years	Middle/JSS/JHS	Currently married	15-34 years	Greater Accra	Urban	Richest	Improved source of drinking water	Unimproved
1907	Female	15-34 years	Secondary/SSS/SHS	Currently married	15-34 years	Greater Accra	Urban	Middle	Improved source of drinking water	Unimproved
1908	Female	15-34 years	Higher	Currently married	15-34 years	Upper East	Urban	Richest	Improved source of drinking water	Unimproved
1909	Female	15-34 years	Secondary/SSS/SHS	Currently married	15-34 years	Upper East	Urban	Middle	Improved source of drinking water	Unimproved
1910	Female	15-34 years	Middle/JSS/JHS	Currently married	15-34 years	Upper East	Rural	Middle	Improved source of drinking water	Improved
1911	Female	15-34 years	No education/preschool	Currently married	15-34 years	Upper East	Rural	Poorest	Improved source of drinking water	Unimproved
1912	Female	15-34 years	Middle/JSS/JHS	Currently married	15-34 years	Brong Ahafo	Urban	Poorest	Improved source of drinking water	Unimproved
1913	Female	15-34 years	Primary	Currently married	15-34 years	Brong Ahafo	Urban	Middle	Improved source of drinking water	Unimproved
1914	Female	15-34 years	Middle/JSS/JHS	Currently married	15-34 years	Brong Ahafo	Urban	Middle	Improved source of drinking water	Unimproved
1915	Female	15-34 years	No education/preschool	Currently married	15-34 years	Central	Urban	Middle	Improved source of drinking water	Unimproved
1916	Female	15-34 years	Secondary/SSS/SHS	Currently married	15-34 years	Volta	Urban	Richer	Improved source of drinking water	Unimproved
1917	Female	15-34 years	Middle/JSS/JHS	Currently married	15-34 years	Volta	Urban	Poorer	Improved source of drinking water	Unimproved
1918	Female	15-34 years	Primary	Currently married	15-34 years	Eastern	Rural	Richer	Improved source of drinking water	Unimproved
1919	Female	15-34 years	Higher	Currently married	15-34 years	Greater Accra	Urban	Richest	Improved source of drinking water	Unimproved
1920	Female	15-34 years	Primary	Currently married	15-34 years	Central	Rural	Richer	Improved source of drinking water	Unimproved
1921	Female	15-34 years	Higher	Currently married	15-34 years	Central	Rural	Richer	Improved source of drinking water	Unimproved
1922	Female	15-34 years	Primary	Currently married	15-34 years	Central	Rural	Middle	Improved source of drinking water	Unimproved
1923	Female	15-34 years	Middle/JSS/JHS	Currently married	15-34 years	Eastern	Urban	Richest	Improved source of drinking water	Unimproved
1924	Female	15-34 years	Secondary/SSS/SHS	Currently married	15-34 years	Eastern	Urban	Richest	Improved source of drinking water	Unimproved
1925	Female	15-34 years	Middle/JSS/JHS	Currently married	15-34 years	Eastern	Urban	Richest	Improved source of drinking water	Unimproved
1926	Female	15-34 years	Middle/JSS/JHS	Currently married	15-34 years	Upper East	Rural	Poorest	Improved source of drinking water	Unimproved
1927	Female	15-34 years	Middle/JSS/JHS	Currently married	15-34 years	Central	Urban	Richer	Improved source of drinking water	Unimproved
1928	Female	15-34 years	Primary	Currently married	15-34 years	Brong Ahafo	Urban	Richer	Improved source of drinking water	Unimproved
1929	Female	15-34 years	Secondary/SSS/SHS	Currently married	15-34 years	Brong Ahafo	Urban	Middle	Improved source of drinking water	Unimproved
1930	Female	15-34 years	Middle/JSS/JHS	Currently married	15-34 years	Eastern	Rural	Poorer	Improved source of drinking water	Unimproved
1931	Female	15-34 years	Middle/JSS/JHS	Currently married	15-34 years	Eastern	Rural	Middle	Improved source of drinking water	Unimproved
1932	Female	15-34 years	Middle/JSS/JHS	Currently married	15-34 years	Eastern	Rural	Middle	Improved source of drinking water	Unimproved
1933	Female	15-34 years	No education/preschool	Currently married	15-34 years	Central	Rural	Poorer	Improved source of drinking water	Unimproved
1934	Female	15-34 years	Secondary/SSS/SHS	Currently married	15-34 years	Central	Rural	Poorer	Improved source of drinking water	Unimproved
1935	Female	15-34 years	Primary	Currently married	15-34 years	Volta	Rural	Poorest	Unimproved source of drinking water	Unimproved
1936	Female	15-34 years	Primary	Currently married	15-34 years	Volta	Urban	Middle	Improved source of drinking water	Unimproved
1937	Female	15-34 years	Middle/JSS/JHS	Currently married	15-34 years	Brong Ahafo	Rural	Poorer	Improved source of drinking water	Unimproved
1938	Female	15-34 years	Middle/JSS/JHS	Currently married	15-34 years	Brong Ahafo	Rural	Middle	Improved source of drinking water	Unimproved
1939	Female	15-34 years	Middle/JSS/JHS	Currently married	15-34 years	Brong Ahafo	Rural	Middle	Improved source of drinking water	Unimproved
1940	Female	15-34 years	Middle/JSS/JHS	Currently married	15-34 years	Brong Ahafo	Rural	Poorer	Improved source of drinking water	Unimproved
1941	Female	15-34 years	Primary	Currently married	15-34 years	Upper East	Urban	Poorest	Improved source of drinking water	Unimproved
1942	Female	15-34 years	No education/preschool	Currently married	15-34 years	Upper West	Rural	Poorer	Improved source of drinking water	Unimproved
1943	Female	15-34 years	No education/preschool	Currently married	15-34 years	Northern	Rural	Poorest	Improved source of drinking water	Unimproved
1944	Female	15-34 years	Primary	Currently married	15-34 years	Eastern	Rural	Middle	Improved source of drinking water	Unimproved
1945	Female	15-34 years	Secondary/SSS/SHS	Currently married	15-34 years	Central	Urban	Richest	Improved source of drinking water	Improved
1946	Female	15-34 years	Secondary/SSS/SHS	Currently married	15-34 years	Central	Urban	Richest	Improved source of drinking water	Unimproved
1947	Female	15-34 years	Higher	Currently married	15-34 years	Greater Accra	Rural	Richer	Improved source of drinking water	Unimproved
1948	Female	15-34 years	Primary	Currently married	15-34 years	Greater Accra	Rural	Middle	Improved source of drinking water	Unimproved
1949	Female	15-34 years	Middle/JSS/JHS	Currently married	15-34 years	Ashanti	Rural	Middle	Improved source of drinking water	Unimproved
1950	Female	15-34 years	No education/preschool	Currently married	15-34 years	Upper East	Urban	Poorer	Improved source of drinking water	Unimproved
1951	Female	15-34 years	Middle/JSS/JHS	Currently married	15-34 years	Greater Accra	Urban	Middle	Improved source of drinking water	Unimproved
1952	Female	15-34 years	Middle/JSS/JHS	Currently married	15-34 years	Eastern	Rural	Poorer	Improved source of drinking water	Unimproved
1953	Female	15-34 years	Middle/JSS/JHS	Currently married	15-34 years	Eastern	Rural	Poorer	Improved source of drinking water	Unimproved
1954	Female	15-34 years	Primary	Currently married	15-34 years	Central	Urban	Richest	Improved source of drinking water	Unimproved
1955	Female	15-34 years	Middle/JSS/JHS	Currently married	15-34 years	Central	Urban	Middle	Improved source of drinking water	Unimproved
1956	Female	15-34 years	No education/preschool	Currently married	15-34 years	Central	Urban	Poorer	Improved source of drinking water	Unimproved
1957	Female	15-34 years	Middle/JSS/JHS	Currently married	15-34 years	Ashanti	Urban	Richer	Improved source of drinking water	Unimproved
1958	Female	15-34 years	No education/preschool	Currently married	15-34 years	Ashanti	Urban	Richer	Improved source of drinking water	Unimproved
1959	Female	15-34 years	Primary	Currently married	15-34 years	Western	Rural	Poorer	Improved source of drinking water	Improved
1960	Female	15-34 years	Secondary/SSS/SHS	Currently married	15-34 years	Ashanti	Urban	Richer	Improved source of drinking water	Unimproved
1961	Female	15-34 years	Middle/JSS/JHS	Currently married	15-34 years	Ashanti	Urban	Richest	Improved source of drinking water	Unimproved
1962	Female	15-34 years	Primary	Currently married	15-34 years	Ashanti	Urban	Richer	Improved source of drinking water	Unimproved
1963	Female	15-34 years	Middle/JSS/JHS	Currently married	15-34 years	Ashanti	Urban	Richest	Improved source of drinking water	Improved
1964	Female	15-34 years	Middle/JSS/JHS	Currently married	15-34 years	Western	Rural	Poorer	Improved source of drinking water	Unimproved
1965	Female	15-34 years	Middle/JSS/JHS	Currently married	15-34 years	Western	Rural	Middle	Improved source of drinking water	Unimproved
1966	Female	15-34 years	Middle/JSS/JHS	Currently married	15-34 years	Western	Urban	Richest	Improved source of drinking water	Unimproved
1967	Female	15-34 years	Secondary/SSS/SHS	Currently married	15-34 years	Brong Ahafo	Urban	Richer	Improved source of drinking water	Unimproved
1968	Female	15-34 years	No education/preschool	Currently married	15-34 years	Greater Accra	Urban	Middle	Improved source of drinking water	Unimproved
1969	Female	15-34 years	Higher	Currently married	15-34 years	Ashanti	Urban	Richest	Improved source of drinking water	Improved
1970	Female	15-34 years	Middle/JSS/JHS	Currently married	15-34 years	Ashanti	Urban	Richest	Improved source of drinking water	Unimproved
1971	Female	15-34 years	Primary	Currently married	15-34 years	Eastern	Rural	Poorest	Unimproved source of drinking water	Unimproved
1972	Female	15-34 years	Primary	Currently married	15-34 years	Eastern	Rural	Poorest	Unimproved source of drinking water	Unimproved
1973	Female	15-34 years	Middle/JSS/JHS	Currently married	15-34 years	Central	Rural	Middle	Improved source of drinking water	Unimproved
1974	Female	15-34 years	Secondary/SSS/SHS	Currently married	15-34 years	Central	Rural	Middle	Improved source of drinking water	Unimproved
1975	Female	15-34 years	Middle/JSS/JHS	Currently married	15-34 years	Central	Rural	Middle	Improved source of drinking water	Unimproved
1976	Female	15-34 years	Middle/JSS/JHS	Currently married	15-34 years	Eastern	Urban	Richest	Improved source of drinking water	Unimproved
1977	Female	15-34 years	Middle/JSS/JHS	Currently married	15-34 years	Eastern	Urban	Richer	Improved source of drinking water	Unimproved
1978	Female	15-34 years	Middle/JSS/JHS	Currently married	15-34 years	Ashanti	Rural	Richer	Improved source of drinking water	Unimproved
1979	Female	15-34 years	Middle/JSS/JHS	Currently married	15-34 years	Ashanti	Rural	Middle	Improved source of drinking water	Unimproved
1980	Female	15-34 years	Primary	Currently married	15-34 years	Central	Rural	Poorer	Improved source of drinking water	Unimproved
1981	Female	15-34 years	Higher	Currently married	15-34 years	Upper West	Urban	Richer	Improved source of drinking water	Unimproved
1982	Female	15-34 years	No education/preschool	Currently married	15-34 years	Upper West	Urban	Middle	Improved source of drinking water	Unimproved
1983	Female	15-34 years	Primary	Currently married	15-34 years	Eastern	Rural	Poorer	Unimproved source of drinking water	Unimproved
1984	Female	15-34 years	Primary	Currently married	15-34 years	Eastern	Rural	Poorer	Unimproved source of drinking water	Unimproved
1985	Female	15-34 years	Primary	Currently married	15-34 years	Ashanti	Rural	Middle	Improved source of drinking water	Unimproved
1986	Female	15-34 years	Middle/JSS/JHS	Currently married	15-34 years	Eastern	Urban	Middle	Improved source of drinking water	Unimproved
1987	Female	15-34 years	Primary	Currently married	15-34 years	Western	Rural	Poorer	Unimproved source of drinking water	Unimproved
1988	Female	15-34 years	Middle/JSS/JHS	Currently married	15-34 years	Central	Urban	Richest	Improved source of drinking water	Unimproved
1989	Female	15-34 years	Secondary/SSS/SHS	Currently married	15-34 years	Central	Urban	Richest	Improved source of drinking water	Unimproved
1990	Female	15-34 years	Middle/JSS/JHS	Currently married	15-34 years	Central	Urban	Richer	Improved source of drinking water	Improved
1991	Female	15-34 years	No education/preschool	Currently married	15-34 years	Volta	Rural	Middle	Improved source of drinking water	Unimproved
1992	Female	15-34 years	No education/preschool	Currently married	15-34 years	Western	Rural	Poorer	Improved source of drinking water	Unimproved
1993	Female	15-34 years	No education/preschool	Currently married	15-34 years	Ashanti	Urban	Poorest	Unimproved source of drinking water	Unimproved
1994	Female	15-34 years	Middle/JSS/JHS	Currently married	15-34 years	Ashanti	Urban	Richer	Unimproved source of drinking water	Unimproved
1995	Female	15-34 years	Primary	Currently married	15-34 years	Eastern	Urban	Poorer	Improved source of drinking water	Unimproved
1996	Female	15-34 years	Middle/JSS/JHS	Currently married	15-34 years	Upper West	Rural	Poorer	Improved source of drinking water	Unimproved
1997	Female	15-34 years	Primary	Currently married	15-34 years	Upper West	Rural	Poorest	Unimproved source of drinking water	Unimproved
1998	Female	15-34 years	No education/preschool	Currently married	15-34 years	Western	Rural	Middle	Improved source of drinking water	Unimproved
1999	Female	15-34 years	No education/preschool	Currently married	15-34 years	Western	Rural	Middle	Improved source of drinking water	Unimproved
[truncated: 9,830 more rows]
